1 **The genetic architecture of human infectious diseases and pathogen-**  
2 **induced cellular phenotypes**

3  
4 **Authors:** Andrew T. Hale<sup>1,2</sup>, Dan Zhou<sup>2</sup>, Rebecca L. Sale<sup>2</sup>, Lisa Bastarache<sup>3</sup>, Liuyang Wang<sup>4,5</sup>,  
5 Sandra S. Zinkel<sup>6</sup>, Steven J. Schiff<sup>7</sup>, Dennis C. Ko<sup>4</sup>, and Eric R. Gamazon<sup>2,8,9,10\*</sup>

6  
7 <sup>1</sup>Vanderbilt University School of Medicine, Medical Scientist Training Program, Nashville, TN.

8 <sup>2</sup>Vanderbilt Genetics Institute & Division of Genetic Medicine, Vanderbilt University Medical  
9 Center, Nashville, TN.

10 <sup>3</sup>Department of Bioinformatics, Vanderbilt University School of Medicine, Nashville, TN.

11 <sup>4</sup>Department of Molecular Genetics and Microbiology, Duke University School of Medicine,  
12 Durham, NC.

13 <sup>5</sup>Division of Infectious Diseases, Department of Medicine, Duke University School of Medicine,  
14 Durham, NC.

15 <sup>6</sup>Division of Hematology and Oncology, Vanderbilt University Medical Center, Nashville, TN.

16 <sup>7</sup>Centers for Neural Engineering and Infectious Disease Dynamics, Departments of  
17 Neurosurgery, Engineering Science and Mechanics, and Physics, Penn State University.  
18 University Park, PA.

19 <sup>8</sup>Clare Hall, University of Cambridge, Cambridge, UK.

20 <sup>9</sup>MRC Epidemiology Unit, University of Cambridge, Cambridge, UK

21 <sup>10</sup>Lead Contact.

22

23 \* Correspondence and requests for materials should be addressed to E.R.G.

24 ([eric.gamazon@vanderbilt.edu](mailto:eric.gamazon@vanderbilt.edu))

25

26 **Abstract**

27

28 Here, we develop a genetics-anchored framework to decipher mechanisms of infectious disease  
29 (ID) risk and infer causal effect on potential complications. We perform transcriptome-wide  
30 association studies (TWAS) of 35 ID traits in 27,615 individuals in a broad collection of human  
31 tissues, identifying 70 gene-level associations with 26 ID traits, with replication in two large-  
32 scale biobanks. A phenome-scale scan and Mendelian Randomization of the 70 gene-level  
33 associations across 197 traits proposes a molecular basis for known complications of the ID  
34 traits. This rich resource of host genetic associations with pathogen cultures and 16S-rRNA-  
35 based microbiome variation provides a platform to investigate host-pathogen interactions. To  
36 identify relevant cellular processes, we develop a TWAS repository of 79 pathogen-exposure  
37 induced cellular phenotypes. Our study will facilitate mechanistic insights into the role of host  
38 genetic variation on ID risk and pathophysiology, with important implications for our molecular  
39 understanding of severe phenotypic outcomes.

40

41

42 **Keywords:** PrediXcan; Human Genetics; Infectious Disease; Transcriptomics; TWAS; GWAS;  
43 Electronic Health Records; Hi-HOST; BioVU; UK Biobank; FinnGen; Functional Genomics;  
44 GTEx; PheWAS; Mendelian Randomization; Clinical Microbiology; 16S rRNA; Microbiome

45

46

## 47 INTRODUCTION

48 Genome-wide association studies (GWAS) and large-scale DNA biobanks with  
49 phenome-scale information are making it possible to identify the genetic basis of a wide range  
50 of complex traits in humans<sup>1,2</sup>. A parallel development is the increasing availability of GWAS  
51 summary statistics, facilitating genetic analyses of entire disease classes and promising  
52 considerably improved resolution of genetic effects on human disease<sup>3,4</sup>. Recent analysis  
53 involving 558 well-powered GWAS results found that trait-associated loci cover ~50% of the  
54 genome, enriched in both coding and regulatory regions, and of these, ~90% are implicated in  
55 multiple traits<sup>5</sup>. However, the breadth of clinical and biological information in these datasets will  
56 require new methodologies and additional high-dimensional data to advance our understanding  
57 of the genetic architecture of complex traits and relevant molecular mechanisms<sup>6-8</sup>. Approaches  
58 to understanding the functional consequences of implicated loci and genes are needed to  
59 determine causal pathways and potential mechanisms for pharmacological intervention.

60 The genetic basis of infectious disease (ID) risk and severity has been relatively  
61 understudied using GWAS methodologies. ID risk and pathogenesis is likely to be multifactorial,  
62 resulting from a complex interplay of host genetic variation, environmental exposure, and  
63 pathogen-specific molecular mechanisms. Although monogenic mechanisms of ID risk have  
64 been demonstrated, characterizing the genetic architecture of ID risk remains challenging<sup>9-13</sup>.  
65 Phenome-scale information increasingly available in large-scale DNA biobanks offers  
66 opportunities to fill gaps in our understanding of the causal effect of ID risk on other traits,  
67 including adverse outcomes.

68 Here we conduct genome-wide association studies (GWAS) and transcriptome-wide  
69 association studies (TWAS) of 35 ID traits. To implement the latter, we apply PrediXcan<sup>7,14</sup>,  
70 which exploits the genetic component of gene expression to probe the molecular basis of  
71 disease risk. We combine information across a broad collection of tissues to determine gene-  
72 level associations using a multi-tissue approach, which displays improved statistical power over

73 a single-tissue approach<sup>7,14,15</sup>. Notably, we identify 70 gene-level associations for 26 of 35 ID  
74 traits, i.e., heretofore referred to as ID-associated genes, and conduct replication using the  
75 corresponding traits in the UK Biobank and FinnGen consortia data<sup>1,16</sup>. The rich resource of  
76 genetic information linked to clinical microbiology information (serology and culture data) across  
77 bacterial, fungal, and viral genera that we leverage provides a platform to interrogate the genetic  
78 basis of compartment-specific infection and colonization. Linking high-resolution taxonomic  
79 classification from 16S ribosomal RNA (rRNA) sequencing to host GWAS information has been  
80 used to investigate the contribution of host genetic variation to microbiome composition<sup>17</sup>. We  
81 exploit host GWAS for 155 pathogens in the microbiome<sup>17</sup> to gain further insights into identified  
82 genetic risk factors for an ID trait. To determine the phenotypic consequences of ID-associated  
83 genes, including adverse outcomes and complications, we perform a phenome-scale scan  
84 across hematologic, respiratory, cardiovascular, and neurologic traits. We use a Mendelian  
85 Randomization framework<sup>18</sup> to conduct causal inference on the effect of a clinical ID trait on an  
86 adverse clinical outcome. To elucidate the cellular mechanisms through which host genetic  
87 variation influences disease risk, we generate an atlas of gene-level associations with 79  
88 pathogen-induced cellular phenotypes determined by High-throughput Human *in vitro*  
89 Susceptibility Testing (Hi-HOST)<sup>19</sup> as a discovery and replication platform. The rich genomic  
90 resource we generate and the integrative methodology we develop promise to yield discoveries  
91 on the molecular mechanisms of infection, improve our understanding of adverse outcomes and  
92 complications, and enable prioritization of new therapeutic targets.

93

## 94 **RESULTS**

95 A schematic diagram illustrating our study design and the reference resource we provide  
96 can be found in Figure 1. Here we analyzed 35 clinical ID traits, 79 pathogen-exposure-induced  
97 cellular traits, and 197 (cardiovascular, hematologic, neurologic, and respiratory) traits. We  
98 performed GWAS and TWAS<sup>14,20</sup> to investigate the genetic basis of the ID traits and their

99 potential adverse outcomes and complications. We exploited serology and culture data linked to  
100 genetic information and genome-wide associations with microbiome traits to investigate  
101 compartment-specific patterns of infection. We conducted causal inference within a Mendelian  
102 Randomization framework<sup>21</sup>, exploiting genetic instruments for naturally “randomized controlled  
103 trials” to evaluate the causal effect of a modifiable exposure or risk factor on a clinical  
104 phenotype. We generate a rich resource for understanding the genetic and molecular basis of  
105 infection and potential adverse effects and complications.

106

107 *GWAS and TWAS of 35 infectious disease clinical phenotypes implicate broad range of*  
108 *molecular mechanisms*

109 We sought to characterize the genetic determinants of 35 ID traits, including many which  
110 have never been investigated using a genome-wide approach. First, we performed GWAS of  
111 each of these phenotypes using a cohort of 23,294 and 4,321 BioVU individuals of European  
112 and African ancestry, respectively, with extensive EHR information from BioVU<sup>2</sup>. We identified  
113 genome-wide significant associations ( $p < 5 \times 10^{-8}$ ) for 13 ID traits (Figure 2A and Supplementary  
114 Table 1). The SNP rs17139584 on chromosome 7 was our most significant association ( $p =$   
115  $1.21 \times 10^{-36}$ ) across all traits, with bacterial pneumonia. A LocusZoom plot shows several  
116 additional genome-wide significant variants in the locus (Figure 2B), in low linkage  
117 disequilibrium ( $r^2 < 0.20$ ) with the sentinel variant rs17139584, including variants in the *MET*  
118 gene and in *CFTR*. The *MET* gene acts as a receptor to *Listeria monocytogenes* internalin InIB,  
119 mediating entry into host cells; interestingly, listeriosis, a bacterial infection caused by this  
120 pathogen, can lead to pneumonia<sup>22</sup>. Given the observed associations in the cystic fibrosis gene  
121 *CFTR* (~650 Kb downstream of *MET*), we also asked whether the rs17139584 association was  
122 driven by cystic fibrosis. Notably, the SNP remained nominally significant, though its  
123 significance was substantially reduced, after adjusting for cystic fibrosis status ( $p = 0.007$ ; see  
124 Methods) or excluding the cystic fibrosis cases ( $p = 0.02$ ). The LD profile of the genome-wide

125 significant results in this locus (Figure 2B) is consistent with the involvement of multiple  
126 independent loci (e.g., *MET* and *CFTR*) underlying bacterial pneumonia risk. The rs17139584  
127 association replicated ( $p = 5.3 \times 10^{-3}$ ) in the UK Biobank<sup>1</sup>. Eighty percent to ninety percent of  
128 patients with cystic fibrosis suffer from respiratory failure due to chronic bacterial infection (with  
129 *Pseudomonas aeruginosa*)<sup>23</sup>. Thus, future studies on the role of this locus in lung infection  
130 associated with cystic fibrosis may provide germline predictors of this complication; alternatively,  
131 the locus may confer susceptibility to lung inflammation, regardless of cystic fibrosis status.  
132 Collectively, our analysis shows strong support for allelic heterogeneity, with likely multiple  
133 independent variants in the locus contributing to interindividual variability in bacterial pneumonia  
134 susceptibility.

135 Additional examples of genome-wide significant associations with other ID traits were  
136 identified. For example, rs192146294 on chromosome 1 was significantly associated ( $p =$   
137  $1.23 \times 10^{-9}$ ) with *Staphylococcus* infection. In addition, 10 variants on chromosome 8 were  
138 significantly associated ( $p < 1.17 \times 10^{-8}$ ) with Mycoses infection.

139 Next, to improve statistical power, we performed multi-tissue PrediXcan<sup>7,14,15</sup>. We  
140 constructed an atlas of TWAS associations with these ID traits in separate European and  
141 African American ancestry cohorts (Supplementary Data File 1). Notably, 70 genes reached  
142 experiment-wide or individual ID-trait significance for 26 of the 35 clinical ID traits (Figure 3A  
143 and Table 1). Sepsis, the clinical ID trait with the largest sample size in our data (Figure 3B;  
144 Phecode 994; number of cases 2,921; number of controls 22,874), was significantly associated  
145 ( $p = 8.16 \times 10^{-7}$ ) with *IKZF5* after Bonferroni correction for the number of genes tested (adjusted  $p$   
146  $< 0.05$ ). The significant genes (Table 1) were independent of the sentinel variants from the  
147 GWAS (Supplementary Table 1), indicating that the gene-based test was identifying additional  
148 signals.

149 Our analysis identified previously implicated genes for the specific ID traits but also  
150 proposes novel genes and mechanisms. ID-associated genes include *NDUFA4* for intestinal

151 infection, a component of the cytochrome oxidase and regulator of the electron transport chain<sup>24</sup>;  
152 *AKIRIN2* for candidiasis, an evolutionarily conserved regulator of inflammatory genes in  
153 mammalian innate immune cells<sup>25,26</sup>; *ZNF577* for viral hepatitis C, a gene previously shown to  
154 be significantly hypermethylated in hepatitis C related hepatocellular carcinoma<sup>27</sup>; and epithelial  
155 cell adhesion molecule (*EPCAM*) for tuberculosis, a known marker for differentiating malignant  
156 tuberculous pleurisy<sup>28</sup>, among many others. These examples of ID-associated genes highlight  
157 the enormous range of molecular mechanisms that may contribute to susceptibility and  
158 complication phenotypes.

159  
160 *Replication of gene-level associations with infectious diseases in the UK Biobank and FinnGen*

161 To bolster our genetic findings and show that our results were not driven by biobank-  
162 specific confounding, we performed extensive replication, using the biobank with the largest  
163 sample size (for a given trait) as the discovery dataset (see Methods). Here, replication is  
164 defined by concordant direction of effect and statistical significance after Bonferroni adjustment  
165 (adjusted  $p < 0.05$ ) in the test dataset. Replicated genes include *FAM166A* (discovery  $p =$   
166  $2.85 \times 10^{-11}$ , replication  $p = 2.56 \times 10^{-5}$ ) and *GPATCH11* (discovery  $p = 2.22 \times 10^{-11}$ , replication  $p =$   
167  $4.39 \times 10^{-3}$ ) for bacterial pneumonia in lung tissue. The complete list of replicated genes by trait  
168 and tissue can be found in Supplemental Data File 2.

169 We investigated the concordance of results across the datasets. For example, we found  
170 that the genes associated with intestinal infection ( $p < 0.05$ ) in BioVU (discovery dataset) – the  
171 ID trait with the largest sample size in BioVU and with a matching dataset in the independent  
172 FinnGen biobank – showed a significantly greater level of enrichment for gene-level  
173 associations with the same trait in FinnGen (test dataset) compared to the remaining set of  
174 genes (Figure 3C). In particular, higher significance (i.e., lower p-value) was observed in  
175 FinnGen for the intestinal infection associated genes identified in BioVU, which included the top  
176 association *NDUFA4* (BioVU  $p = 1.83 \times 10^{-9}$ , FinnGen  $p = 0.044$ ). These results suggest there

177 are likely to be additional causal genes among the top associations, which will be identified and  
178 replicated when adequate sample sizes for the biobanks are achieved<sup>12,29</sup>.

179 We identified tissue-level replications for the following ID traits: bacterial pneumonia  
180 (lung, Phecode 480.1), influenza (lung, Phecode 481), meningitis (10 brain regions, Phecode  
181 320), and encephalitis (10 brain regions, Phecode 323) (Supplementary Data Files 2-3). As  
182 before, to improve statistical power to discover tissue-level associations, we used BioVU as the  
183 discovery platform and the UK Biobank as the replication dataset (adjusted  $p < 0.05$ , see  
184 Methods) (Figure S1A-G and Supplementary Data File 2). This replication analysis identified  
185 robust gene-level associations with influenza (Figure 3D, Supplementary Data Files 2-3) and  
186 bacterial pneumonia (Figure S1A, Supplementary Data Files 2-3). We provide a longer list of the  
187 top genes ( $p < 0.05$  in BioVU) with nominal associations with influenza (Supplementary Data  
188 Files 2-3) and viral pneumonia (Supplementary Data File 3) in FinnGen ( $p < 0.05$ ) as a resource  
189 to the community.

190 We found substantial enrichment for genes with high significance (low p-values) in the  
191 respective brain tissues in the UK Biobank (test dataset) for top gene associations with  
192 meningitis ( $p < 0.05$ ) in BioVU (discovery dataset) in hippocampus, cerebellar hemisphere, and  
193 hypothalamus (Figure S1B-D, Supplementary Data Files 2-3). Similar enrichment patterns were  
194 observed for the remaining brain tissues (Supplementary Data Files 2-3). Likewise, significant  
195 enrichment results (Figure S1E-G, Supplementary Data Files 2-3) in brain tissues (with BioVU  
196 as discovery dataset and UK Biobank as test dataset) were observed for encephalitis. Using  
197 FinnGen (test dataset), we continued to observe enrichment (though not as pronounced) for  
198 genes with high significance for some ID traits. For example, the top cerebellar gene  
199 associations with meningitis ( $p < 0.05$ ) in BioVU improved the signal-to-noise ratio for the  
200 cerebellar associations in FinnGen (Figure 3E).

201



202 *Tissue expression profile of infectious disease associated genes suggests tissue-dependent*  
203 *mechanisms*

204 The ID-associated genes tend to be less tissue-specific (i.e., more ubiquitously  
205 expressed) than the remaining genes (Figure S2A, Mann Whitney U test on the  $\tau$  statistic,  $p =$   
206  $7.5 \times 10^{-4}$ ), possibly reflecting the multi-tissue PrediXcan approach we implemented, which  
207 prioritizes genes with multi-tissue support to improve statistical power. We hypothesized that  
208 tissue expression profiling of ID-associated genes can provide additional insights into disease  
209 etiologies and mechanisms. For example, the intestinal infection associated gene *NDUFA4* is  
210 expressed in a broad set of tissues, including the alimentary canal, but displays relatively low  
211 expression in whole blood (Figure S2B). In addition, *TOR4A*, the most significant association  
212 with bacterial pneumonia (Table 1), is most abundantly expressed in lung, consistent with the  
213 tissue of pathology, but also in spleen (Figure S2C), whose rupture is a lethal complication of  
214 the disease<sup>30,31</sup>. These examples illustrate the diversity of tissue-dependent mechanisms that  
215 may contribute in complex and dynamic ways to interindividual variability in ID susceptibility and  
216 progression. We therefore provide a resource of gene-level associations with the ID traits in a  
217 broad collection of tissues to facilitate molecular or clinical follow-up studies.

218

219 *Genetic overlap reveals host gene expression programs and common pathways as targets for*  
220 *pathogenicity*

221 We hypothesized that ID-associated genes converge on shared functions and pathways,  
222 which may reflect common targeted host transcriptional programs. Among the 70 gene-level  
223 associations with the 35 clinical ID traits, 40 proteins are post-translationally modified by  
224 phosphorylation (Supplementary Table 2), a significant enrichment (Benjamini-Hochberg  
225 adjusted  $p < 0.10$  on DAVID annotations<sup>32</sup>) relative to the rest of the genome, indicating that  
226 phosphoproteomic profiling can shed substantial light on activated host factors and perturbed  
227 signal transduction pathways during infection<sup>33,34</sup>. In addition, 16 proteins are acetylated,

228 consistent with emerging evidence supporting this mechanism in the host antiviral response<sup>35</sup>  
229 (Supplementary Table 3). These data highlight specific molecular mechanisms across ID traits  
230 with critical regulatory roles (e.g., protein modifications) in host response among the ID-  
231 associated genes.

232 We tested the hypothesis that distinct infectious agents exploit common pathways to find  
233 a compatible intracellular niche in the host, potentially implicating shared genetic risk factors.  
234 Notably, 64 of the 70 ID-associated genes (Table 1) were nominally associated ( $p < 0.05$ ) with  
235 multiple ID traits (Supplementary Table 4). These genes warrant further functional study as  
236 broadly exploited mechanisms targeted by pathogens or as broadly critical to pathogen-elicited  
237 immune response. Gene Set Enrichment Analysis (GSEA) of these genes implicated a number  
238 of significant ( $FDR < 0.05$ ) gene sets (Figure 4A), including those involved in actin-based  
239 processes and cytoskeletal protein binding, processes previously demonstrated to mediate host  
240 response to pathogen infection<sup>36</sup>. Since diverse bacterial and viral pathogens target host  
241 regulators that control the cytoskeleton (which plays a key role in the biology of infection) or  
242 modify actin in order to increase virulence, intracellular motility, or intercellular spread<sup>37-39</sup>, these  
243 results reassuringly lend support to the involvement of the genes in infectious pathogenesis.

244 Notably, we identified an enrichment ( $FDR = 9.68 \times 10^{-3}$ ) for a highly conserved motif  
245 (“TCCCRNNRTGC”), within 4 kb of transcription start site (TSS) of multi-ID associated genes  
246 (Figure 4A-B), that does not match any known transcription factor binding site<sup>40</sup> and may be  
247 pivotal for host-pathogen interaction for the diversity of infectious agents included in our study.  
248 In addition, we found that several of the multi-ID associated genes (with the sequence motif  
249 near the TSS) have been observed in host-pathogen protein complexes (by both  
250 coimmunoprecipitation and affinity chromatography approaches) for the specific pathogens  
251 responsible for the ID traits<sup>41</sup>. See Supplementary Data File 4 for complete list of host-pathogen  
252 interactions for these genes/proteins. One example is *CDK5*, a gene significantly associated  
253 with Gram-positive septicemia (Table 1) and nominally associated with multiple ID traits,

254 including herpes simplex. CDK5 is activated by p35, whose cleaved form p25 results in  
255 subcellular relocalization of CDK5. The CDK5-p25 complex regulates inflammation<sup>42</sup> (whose  
256 large-scale disruption is characteristic of septicemia) and induces cytoskeletal disruption in  
257 neurons<sup>43</sup> (where the herpes virus is responsible for lifelong latent infection). The A and B  
258 chains of the CDK5-p25 complex (Figure 4C for structure diagram<sup>44</sup>) are required for  
259 cytoskeletal protein binding (CDK5), whereas the D and E chains (p25) are involved in actin  
260 regulation and kinase function, all molecular processes implicated in our pathway analysis.  
261 Intriguingly, blocking CDK5 can have a substantial impact on the outcome of inflammatory  
262 diseases including sepsis<sup>45</sup>, enhancing the anti-inflammatory potential of immunosuppressive  
263 treatments, and has been shown to attenuate herpes virus replication<sup>46</sup>, suggesting that  
264 modulation of this complex is important for viral pathogenesis.

265 CDK5 is also altered by several other viruses, identified using unbiased mass  
266 spectrometry analysis<sup>47</sup> (Figure 4D), indicating a broadly exploited mechanism (across  
267 pathogens) that is consistent with the gene's multi-ID genetic associations in our TWAS data  
268 (Figure 4D). The CDK5-interaction proteins include: 1) M2\_134A1 (matrix protein 2, influenza A  
269 virus), a component of the proton-selective ion channel required for viral genome release during  
270 cellular entry and is targeted by the anti-viral drug amantadine<sup>48</sup>; 2) VE7\_HP16, a component  
271 of human papillomavirus (HPV) required for cellular transformation and trans-activation through  
272 disassembly of E2F1 transcription factor from RB1 leading to impaired production of type I  
273 interferons<sup>49-51</sup>; 3) VE7\_HP31, which has been shown to engage histone deacetylases 1 and 2  
274 to promote HPV31 genome maintenance<sup>52</sup>; 4) VCYCL\_HHV8P (cyclin homolog within the  
275 human herpesvirus 8 genome), which has been shown to control cell cycle through CDK6 and  
276 induce apoptosis through Bcl2<sup>53-55</sup>; and 5) F5HC81\_HHV8, predicted to act as a viral cyclin  
277 homolog. Overall, these data underscore the evolutionary strategies that pathogens have  
278 evolved to promote infection, including the hijacking of the host transcriptional machinery and  
279 the biochemical alterations of the host proteome.

280

281 *Serology and culture data reveal insights into clinical infection and pathogen colonization*

282 We exploited extensive clinical microbiological laboratory analysis of blood (Figure 5A),  
283 bronchoalveolar lavage, sputum, sinus/nasopharyngeal, and tracheal cultures for bacterial and  
284 fungal pathogen genus identification (Figure S3A-D), as well as respiratory viral genus  
285 identification (Figure S3E) (see Methods) to evaluate phenotype resolution and algorithm. For  
286 example, we found that *Staphylococcus* infection (Phecode = 041.1) performed well in  
287 classifying *Staphylococcus aureus* infection based on blood culture data. The area under the  
288 Receiver Operating Characteristic (ROC) curve was 0.938 (Figure 5B) with standard error of  
289 0.008 generated from bootstrapping (see Methods). The area under the curve (AUC) quantifies  
290 the probability that the Phecode classifier ranks a randomly chosen positive instance of  
291 *Staphylococcus aureus* infection in blood higher than a randomly chosen negative one. In  
292 comparison, the first principal component (PC) in our European ancestry samples showed AUC  
293 of 0.514 (Figure 5B) while sex and age performed even more poorly (AUC  $\approx$  0.50). We then  
294 tested a logistic model with the Phecode classifier, age, sex, and the first 5 PCs in the model.  
295 The Phecode classifier was significantly associated ( $p < 2.2 \times 10^{-16}$ ) after conditioning on the  
296 remaining covariates. The fitted value from the joint model consisting of the remaining  
297 covariates showed AUC of 0.568 (Figure 5B). Collectively, culture data for improved resolution  
298 of clinical infection and pathogen colonization provide validation of our approach.

299 To expand these findings and further dissect the complex pathogen-colonization  
300 patterns in humans, we utilized host genome-wide associations with human gut microbiome  
301 variation for 155 pathogens<sup>17</sup> identified through 16S rRNA sequencing. For example, among the  
302 top SNP associations with *Desulfovibrionaceae* ( $p < 0.0001$ ), a sulfate-reduced bacterium  
303 associated with intraabdominal infections and inflammatory bowel disease<sup>56,57</sup>, we observed an  
304 enrichment for SNPs associated with intestinal infection in BioVU (Figure 5C). These data

305 provide a reference resource to explore how genetically-determined microbiome variation  
306 influences ID trait susceptibility.

307

308 *Phenome scan of clinical ID-associated genes identifies adverse outcomes and complications*

309 Electronic Health Records (EHR) linked to genetic data may reveal insights into  
310 associated clinical sequelae<sup>58-60</sup>. To assess the phenomic impact of ID-associated genes (Table  
311 1), we performed a phenome-scale scan across 197 hematologic, respiratory, cardiovascular,  
312 and neurologic traits available in BioVU (Figure 6A and Supplementary Data File 5). Correcting  
313 for total number of genes and phenotypes tested, we identified four gene-phenotype pairs  
314 reaching experiment-wide significance (adjusted  $p < 0.05$ ): 1) *WFDC12*, our most significant ( $p$   
315 =  $4.23 \times 10^{-6}$ ) association with meningitis and a known anti-bacterial gene<sup>61</sup>, is also associated  
316 with cerebral edema and compression of brain ( $p = 1.35 \times 10^{-6}$ ), a feared clinical complication of  
317 meningitis<sup>62</sup>; 2) *TM7SF3*, the most significant gene with Gram-negative sepsis ( $p = 1.37 \times 10^{-6}$ ), is  
318 also associated with acidosis ( $p = 1.95 \times 10^{-6}$ ), a known metabolic derangement associated with  
319 severe sepsis<sup>63</sup>, and a gene known to play a role in cell stress and the unfolded protein  
320 response<sup>64</sup>; 3) *TXLNB*, the most significant gene associated with viral warts and human  
321 papillomavirus infection ( $p = 4.35 \times 10^{-6}$ ), is also associated with abnormal involuntary  
322 movements,  $p = 1.39 \times 10^{-6}$ ; and 4) *RAD18*, the most significant gene associated with  
323 *Streptococcus* infection ( $p = 2.01 \times 10^{-6}$ ), is also associated with anemia in neoplastic disease ( $p$   
324 =  $3.10 \times 10^{-6}$ ). Thus, coupling genetic analysis to EHR data with their characteristic breadth of  
325 clinical traits offers the possibility of determining the phenotypic consequences of ID-associated  
326 genes, including known (in the case of *WFDC12* and *TM7SF3*) potentially adverse health  
327 outcomes and complications.

328

329 *Mendelian Randomization provides causal support for the effect of infectious disease trait on*  
330 *identified adverse phenotypic outcomes/complications*

331 Since our gene-level associations with clinical ID diagnoses implicated known adverse  
332 complications, we sought to explicitly evaluate the causal relation between the ID traits and the  
333 adverse outcomes/complications. We utilized the Mendelian Randomization paradigm<sup>18</sup> (Figure  
334 6B), which exploits genetic instruments to make causal inferences in observational data, in  
335 effect, performing randomized controlled trials to evaluate the causal effect of “exposure” (i.e.,  
336 ID trait) on “outcome” (e.g., the complication). Specifically, we conducted multiple-instrumental-  
337 variable causal inference using GWAS<sup>21</sup> and PrediXcan summary results. First, we used  
338 independent SNPs ( $r^2 = 0.01$ ) with association  $p < 1.0 \times 10^{-5}$  as genetic instruments. To control  
339 for horizontal pleiotropy and account for the presence of invalid genetic instruments, we utilized  
340 MR-Egger regression and weighted-median Mendelian Randomization (see Methods)<sup>65,66</sup>.

341 We found causal support for the effect of 1) Gram-negative sepsis on acidosis (Figure  
342 6C, weighted-median estimator  $p = 2.0 \times 10^{-7}$ ); and 2) meningitis on cerebral edema and  
343 compression of brain (Figure 5C, weighted-median estimator  $p = 2.7 \times 10^{-3}$ ). Our resource  
344 establishes a platform to elucidate the genetic component of an ID trait and its impact on the  
345 human disease phenome, enabling causal inference on the effect of an ID trait on potential  
346 complications.

347

348 *TWAS of 79 pathogen-exposure induced cellular traits highlights cellular mechanisms and*  
349 *enables validation of ID gene-level associations*

350 Elucidating how the genes influence infection-related cellular trait variation may provide  
351 a mechanistic link to ID susceptibility. We thus performed TWAS of 79 pathogen-induced  
352 cellular traits – including infectivity and replication, cytokine levels, and host cell death, among  
353 others<sup>19</sup> (Supplementary Data File 6). We identified 38 gene-level associations reaching trait-  
354 level significance ( $p < 2.87 \times 10^{-6}$ , correcting for number of statistical tests; Figure 7A). In addition,  
355 we replicated SNP associations with the cellular traits using the genetic associations with the ID

356 traits (Supplementary Data File 7) that map to the specific cellular phenotypes (Supplementary  
357 Data File 8).

358           Integration of EHR data into Hi-HOST<sup>19</sup> may provide additional functional support for the  
359 gene-level associations with a clinical ID trait. For example, we observed a marked enrichment  
360 for genes associated with direct *Staphylococcus* toxin exposure cellular response in Hi-HOST  
361 among the human Gram-positive septicemia associated genes from BioVU (see Supplementary  
362 Data File 6 for genes with FDR < 0.05) (Figure 7B). In addition, integration of EHR data into Hi-  
363 HOST may improve the signal-to-noise ratio in Hi-HOST TWAS data. Indeed, the top 300 genes  
364 nominally associated with Staphylococcus infection (Phecode 041.1) in BioVU departed from  
365 null expectation for their associations with Staphylococcus toxin exposure in Hi-HOST  
366 compared to the full set of genes, which did not (Figure 7C), as perhaps expected due to the  
367 modest sample size. Collectively, these results demonstrate that integrating the EHR-derived  
368 TWAS results into TWAS of the cellular traits can greatly improve identification of potentially  
369 relevant pathogenic mechanisms.

370

#### 371 *Phenome scan of TWAS findings from Hi-HOST*

372           To identify potential adverse effects of direct pathogen exposure, we performed a  
373 phenome-scan across the 197 cardiovascular, hematologic, neurologic, and respiratory traits as  
374 described above. Our top gene-phenotype pairs include: 1) *FAM171B*, our most significant  
375 association with interleukin 13 (IL-13) levels is also associated with alveolar and parietoalveolar  
376 pneumonopathy ( $p = 4.04 \times 10^{-5}$ ), a phenotype known to be modulated by IL-13 dependent  
377 signaling<sup>67</sup>; 2) *OSBPL10*, the most significant gene associated with cell death caused by  
378 *Salmonella enterica serovar Typhimurium*, is also associated with intracerebral hemorrhage ( $p =$   
379  $4.99 \times 10^{-5}$ ), a known complication of *S. Typhimurium* endocarditis<sup>68</sup>. These data highlight the  
380 utility of joint genetic analysis of pathogen-exposure-induced phenotypes and clinical ID traits to

381 gain insights into the molecular and cellular basis of complications and adverse outcomes.

382 However, more definitive conclusions will require larger sample sizes and functional studies.

383

## 384 **DISCUSSION**

385 ID susceptibility is a complex interplay between host genetic variation and pathogen-  
386 exposure induced mechanisms. While GWAS has begun to identify population-dependent loci  
387 conferring ID risk<sup>69</sup>, the underlying function of identified variants, predominantly in non-coding  
388 regulatory regions, remains poorly understood. Molecular characterization of infectious  
389 processes has been, in general, agnostic to the genetic architecture of clinical infection.  
390 Although pathogen exposure is requisite to display clinical ID traits, characterizing the role of  
391 host genetic variation remains challenging.

392 Our study provides a reference atlas of genetic variants and genetically-determined  
393 expression traits associated with a diverse set of clinical ID traits. We identified 70 gene-level  
394 associations in BioVU, with replication for a subset of ID traits in the UK Biobank and FinnGen.  
395 To provide additional support to our findings, we leveraged a rich resource of genetic  
396 information linked to serologic tests and pathogen cultures from five clinical sample sites and  
397 exploited a large catalog of genome-wide associations of microbiome variation generated from  
398 16S rRNA based taxonomic classification. A phenome scan across 197 hematologic, respiratory,  
399 cardiovascular, and neurologic traits proposes a molecular basis for the link between certain ID  
400 traits and outcomes. Using Mendelian Randomization, we determined the ID traits which, as  
401 exposure, show significant causal effect on outcomes. Finally, we developed a TWAS catalog of  
402 79 pathogen-exposure induced cellular traits (Hi-HOST) in a broad collection of tissues, which  
403 provides a platform to interrogate mediating cellular and molecular mechanisms.

404 Genetic predisposition to ID onset and progression is likely to be complex<sup>70</sup>. Monogenic  
405 mechanisms conferring ID risk have been proposed, but these mechanisms are unlikely to  
406 explain the broad contribution of host genetic influence on ID risk<sup>71</sup>. Thus, a function-centric



407 methodology is necessary to disentangle potentially causal pathways. Our approach builds on  
408 PrediXcan, which estimates the genetically-determined component of gene expression<sup>14</sup>. The  
409 genetic component of gene expression can then be tested for association with the trait, enabling  
410 insights into potential pathogenic mechanisms<sup>4</sup> and novel therapeutic strategies<sup>72</sup>. Leveraging  
411 the shared regulatory architecture of gene expression<sup>7</sup> can help prioritize gene mechanisms for  
412 downstream functional studies to provide an avenue to identify causal cell types and genes. Our  
413 results highlight a multi-tissue approach to infer causal genes and pathways relevant to ID  
414 biology.

415 Our study identified genes with diverse functions, including roles in mitochondrial  
416 bioenergetics<sup>24,73</sup>, regulation of cell death<sup>74</sup>, and of course links to host immune response<sup>75-84</sup>.  
417 These diverse functions may contribute to pleiotropic effects on clinical outcomes and  
418 complications. In addition, we identified genes implicated in Mendelian diseases, for which  
419 susceptibility to infection is a predominant feature, including *WIPF1* (OMIM #614493; recurrent  
420 infections and reduced natural killer cell activity<sup>85</sup>), *IL2RA* (OMIM #606367; recurrent bacterial  
421 infections, recurrent viral infections, and recurrent fungal infections<sup>79</sup>), and *TBK1* (OMIM  
422 #617900; herpes simplex encephalitis (HSE), acute infection, and episodic HSE<sup>86</sup>). These  
423 examples show that the identified genes may also confer predisposition, with near-complete  
424 penetrance, to an infectious disease related trait displaying true Mendelian segregation.

425 Enrichment analysis of 64 of the 70 ID-associated genes with nominal support for  
426 associations with other clinical ID traits identified modulation of the actin cytoskeleton as a  
427 potential shared mechanism of host susceptibility to infection (Figure 4). While manipulation of  
428 the actin cytoskeleton by pathogens is hardly a new concept, our study identified specific host  
429 genetic variation in actin regulatory genes that is potentially causative of clinical ID  
430 manifestations. In addition to pathogen interaction with the cytoskeletal transport machinery,  
431 efficient exploitation of host gene expression program is crucial for successful invasion and  
432 colonization, and here we mapped several pathogenicity-relevant targets. Notably, we observed

433 a significant enrichment for a highly conserved sequence motif, within 4 kb of a multi-ID-  
434 associated gene's TSS, that is not a known transcription factor binding site. The motif's  
435 presence near multi-ID associated genes suggests a broad regulatory role in host-pathogen  
436 interaction, involving the diversity of pathogens examined here, towards successful  
437 reprogramming of host gene expression. Furthermore, we identified a significant enrichment for  
438 phosphorylated host proteins, suggesting the value of global phosphoproteomic profiling, which  
439 has recently been used to prioritize pharmacological targets for the novel SARS-CoV-2 virus<sup>87</sup>.  
440 These data highlight several potential avenues by which host susceptibility can be breached by  
441 a pathogen's requirement to maintain a niche through manipulation of host cellular machinery.

442 To obtain additional support for our gene-level associations, we leveraged two genomic  
443 resources with rich phenotypic information (UK Biobank<sup>1</sup> and FinnGen<sup>16</sup>). These data will prove  
444 increasingly useful to characterizing the genetic basis of the ID-associated adverse outcomes  
445 and complications. Despite the caveats for the use of EHR in genetic analyses of ID traits<sup>12,29</sup>,  
446 the growing availability of such independent datasets will facilitate identification of robust genetic  
447 associations. Perhaps more importantly, the breadth of clinical phenotypes in these EHR  
448 datasets should enable identification of associated adverse outcomes and complications for the  
449 ID-associated genes.

450 The primary challenges in conducting GWAS of ID traits include phenotype definition  
451 and case-control misclassification. Obstacles to accurate phenotype definition include the  
452 requirement of specialized laboratory testing to identify specific pathogens and administration of  
453 prophylactic therapeutics complicating identification of potentially causative pathogens.  
454 Seropositivity may result from the complex genetic properties of the pathogen and the particular  
455 mechanisms governing host-pathogen interaction. However, seropositivity may not indicate  
456 clinical manifestations of the disease. On the other hand, seronegativity may imply lack of  
457 exposure to the pathogen, the absence of infection even in the presence of exposure, or host  
458 resistance to infection. Anchoring the analysis to host genetic information (as in our use of

459 genetically-determined expression) and replication of discovered associations may address  
460 some aspects of this challenge. Here we exploit an extensive resource of culture data (for  
461 identification of pathogens from clinical specimens) linked to whole-genome genetic information  
462 to provide additional support to our gene-level associations. One of the ubiquitous problems in  
463 diagnosis is that culture recovery is often for multiple organisms, or a contaminant not relevant  
464 to the actual pathogen. Similarly, molecular diagnostics of pathogen identification is often a  
465 curation of multiple statistically relevant putative pathogens. The mapping of pathogen genome  
466 identification to transcriptional response (molecular seropositivity) is a valuable validation of a  
467 finding that a given pathogen is associated with a particular infectious syndrome, and our  
468 approach to identification of genetically-determined expression changes may facilitate this  
469 mapping. Future studies may also implement more complex GWAS models, including  
470 incorporating the pathogen genome.

471         The catalog of TWAS associations with microbiome composition may facilitate insights  
472 into molecular mechanisms of infectious disease risk and complications, inform studies of host-  
473 pathogen interactions, and improve anti-microbial pharmacologic strategies. Improved  
474 characterization of pathogen colonization and taxonomic classification at species and strain  
475 level through 16S rRNA sequencing-based approaches may lead to greater resolution of  
476 causative infectious processes. Disruption of pathogen equilibrium in the microbiome by  
477 environmental or genetic variation may determine susceptibility to human disease<sup>88,89</sup>. However,  
478 critical challenges to understanding the patterns of host colonization include identification of rare  
479 pathogen populations as well as environmental pressures (i.e. medication use, dietary  
480 alterations, etc.) acutely altering the microbiome landscape<sup>90</sup>. Thus, linking microbiome traits to  
481 host genetic variation promises to improve resolution of causative mechanisms for ID traits and  
482 potentially adverse outcomes.

483         Mendelian Randomization provides a framework to perform causal interference on the  
484 effect of the exposure on the outcome<sup>18,21</sup> using genetic instruments. We leveraged a summary

485 statistics based approach to test the causal effect of an ID trait on potential adverse outcomes.  
486 Mendelian Randomization requires three assumptions: 1) the genetic instrument is associated  
487 with exposure (i.e., ID trait); 2) the genetic instrument is associated with the outcome (i.e.,  
488 adverse outcome or complication) only through the exposure of interest; and 3) the genetic  
489 instrument is affecting the outcome independent of other factors (i.e., confounders). Violations  
490 of these assumptions can have critical implications for the interpretation of the results. Thus,  
491 several approaches have been developed that are robust to these violations. In the case of ID  
492 traits, a methodology that distinguishes causality from comorbidity is critical. While many  
493 phenotypes are highly comorbid and suspected to have a causal relationship (e.g., smoking and  
494 depression/anxiety), Mendelian Randomization does not necessarily support the causal  
495 hypothesis<sup>91</sup>. Furthermore, since RCTs cannot be ethically conducted for ID traits and adverse  
496 outcomes, the methodology offers an approach for elucidating the role of an infection phenotype  
497 or pathogen exposure in disease causation using an observational study design. Here, we  
498 found strong causal support for the effect of certain clinical ID traits on potential adverse  
499 complications identified through a phenome scan of the ID-associated genes: 1) meningitis -  
500 cerebral edema and compression of brain; and 2) Gram-negative sepsis - acidosis.

501 To enable investigations into mediating cellular and molecular traits for the ID-associated  
502 genes, we provide a functional genomics resource built on a high-throughput *in vitro* pathogen  
503 infection screen (Hi-HOST)<sup>19</sup>. Integration of EHR data into Hi-HOST facilitates replication of  
504 gene-level associations with clinical ID traits and greatly improves the signal-to-noise ratio. This  
505 discovery and replication platform, encompassing human phenomics and cellular microbiology,  
506 provides a high-throughput approach to linking host cellular processes to clinical ID traits and  
507 adverse outcomes.

508 Although additional mechanistic studies are warranted, our study provides a foundation  
509 for anchoring targeted molecular studies in human genetic variation. Elucidation of host  
510 mechanisms exploited by pathogens requires multi-disciplinary approaches. Here, we show the

511 broader role of host genetic variation, implicating diverse disease mechanisms. Our study  
512 generates a rich resource and exploits a genetics-anchored methodology to facilitate  
513 investigations of ID-associated clinical outcomes and complications. Causal inference on the  
514 clinical ID traits and potential complications promises to expand our understanding of the  
515 molecular basis for the link and, crucially, enable prediction and prevention of serious adverse  
516 events.

517

## 518 **METHODS**

519

### 520 *BioVU*

521 BioVU, one of the largest DNA biobanks tied to an EHR database, is a subset of the  
522 synthetic derivative (SD), a deidentified electronic health record, consisting of individuals with  
523 whole-genome genetic information. Detailed information on the construction, utilization, ethics,  
524 and policies of the BioVU resource is described elsewhere<sup>2</sup>. ID traits were defined based on a  
525 hierarchical grouping of International Classification of Diseases, Ninth Revision (ICD-9) codes  
526 into phenotype codes (Phecode) representing clinical traits, as previously described<sup>59,92</sup>. (See  
527 below for a description of pathogen culture and viral test data in the BioVU individuals, including  
528 genera detected from different types of cultures.) We used version 1.2 of the Phecode Map  
529 containing 1,965 Phecodes based on 20,203 ICD-9 codes, which substantially improves signal-  
530 to-noise and more accurately reflects the clinical trait. Phecodes may exclude related  
531 phenotypes (e.g., in the case of Gram negative septicemia (Phecode = 038.1), the range of  
532 Phecodes given by 010-041.99, involving bacterial infection) and, importantly, include the  
533 definition of the appropriate control group<sup>93</sup>. Detailed description of Phecode trait maps can be  
534 found at [phewascatalog.org](http://phewascatalog.org). As an efficient and viable model for human genetics research, the

535 Phecode system has been used to perform phenome-wide association studies (PheWAS) for  
536 validation of known genetic associations and discovery of new genetic disorders<sup>59,60</sup>.

537

### 538 *Pathogen culture and virology data linked to whole-genome genetic information*

539 For individuals with whole-genome genetic information, we analyzed pathogen (bacterial,  
540 mycobacterial, and fungal) culture data derived from the following positive cultures for the  
541 indicated clinical samples: 1) blood (n = 7,699), 2) sputum (n = 2,478), 3) sinus/nasopharyngeal  
542 (n = 1,820), 4) bronchial-alveolar lavage (n = 1,265), and 5) tracheal sampling (n = 422).

543 Furthermore, we analyzed a respiratory panel containing 28 viral strains from 2,890 individuals  
544 with whole-genome genetic information. Viral strains included the following: 1) Adenovirus, 2)  
545 Bocavirus, 3) Bordetella parapertussis, 4) Bordetella pertussis, 5) Chlamydia pneumoniae, 6)  
546 Coronavirus 229E, 7) Coronavirus HKU1, 8) Coronavirus NL63, 9) Coronavirus NOS, 10)  
547 Coronavirus OC43, 11) Enterovirus/Rhinovirus, 12) Human Metapneumovirus, 13) Influenza A,  
548 14) Influenza A, H1, 15) Influenza A, H1N1, 16) Influenza A, H3, 17) Influenza B, 18)  
549 Mycoplasma pneumoniae, 19) Parainfluenza, 20) Parainfluenza 1, 21) Parainfluenza 2, 22)  
550 Parainfluenza 3, 23) Parainfluenza 4, 24) Respiratory syncytial virus (RSV), 25) RSV, A, 26)  
551 RSV, B, and 27) Rhinovirus. The pathogen information for each individual in our study included:

552 1) Total number of cultures; 2) Number of negative cultures (i.e., no pathogen growth); 3)  
553 Number of ambiguous cultures (i.e., normal upper respiratory bacteria or low level  
554 contamination); 4) Number of positive cultures (i.e., the number of cultures with growth  
555 consistent with clinical infection); 5) Genus or genera isolated (up to 96 unique genera per  
556 sample site), which ranged from zero to 10 per sample.

557

### 558 *GWAS of ID traits*

559 GWAS of the ID traits were performed on the 23,294 and 4,321 BioVU individuals of  
560 European and African ancestry, respectively. Quality control pre-processing and SNP-level  
561 imputation were conducted, as previously described<sup>60</sup>. Genomic ancestry was quantified using  
562 principal components analysis of the genotype data<sup>94,95</sup>. GWAS of the ID traits were conducted  
563 in separate European and African genomic ancestry cohorts. Within each genomic ancestry, the  
564 association analysis was performed using age, gender, batch, and the first five principal  
565 components as covariates.

566

#### 567 *Conditional SNP-level analysis*

568 We performed conditional analysis on the top GWAS association with the ID trait (in this  
569 case, bacterial pneumonia) to determine whether it was driven by a related covariate (in this  
570 case, cystic fibrosis status). We used logistic regression to model the conditional probability of  
571 the infectious disease:

$$572 \quad \ln \frac{P(Y=1 | s)}{1 - P(Y=1 | s)} = \beta_0 + \beta_1 s + \beta_2 (CF)$$

573 where  $s$  is the genotype at the sentinel variant,  $Y$  is the disease (i.e., bacterial pneumonia)  
574 status, and  $CF$  is the covariate of interest (i.e., cystic fibrosis).

575

#### 576 *Transcriptome-wide association studies (TWAS) using PrediXcan*

577 We performed multi-tissue PrediXcan<sup>7,14,15</sup> in the 23,294 and 4,321 BioVU individuals of  
578 European and African ancestry, respectively. As in the GWAS analyses, these were conducted  
579 in the separate genomic ancestry cohorts. Experiment-wide significance (adjusted  $p < 0.05$ ) was  
580 determined using Bonferroni correction for the total number of genes tested ( $n = 9,868$ ) across  
581 35 phenotypes (i.e.,  $p < 1.4 \times 10^{-7}$ ). Trait-specific significance (adjusted  $p < 0.05$ ) was determined  
582 using Bonferroni correction for the total number of genes tested ( $n = 9,868$ ,  $p < 5.07 \times 10^{-6}$ ).

583 Genomic ancestry was quantified using principal components analysis<sup>94,95</sup>. TWAS results were  
584 visualized using PhenoGram<sup>96</sup>.

585

### 586 *GWAS and TWAS Replication*

587 For each ID trait, replication of GWAS and TWAS was performed using the cohort with  
588 the largest sample size (among BioVU<sup>2</sup>, the UK Biobank<sup>1</sup>, and FinnGen consortia<sup>16</sup>) as  
589 discovery and the remaining biobank(s) as replication. We used the UK Biobank  
590 (<http://www.nealelab.is/uk-biobank>) and the FinnGen ([https://www.finnngen.fi/en/access\\_results](https://www.finnngen.fi/en/access_results))  
591 summary results to generate the gene-level associations. GTEx v6p models (in 44 tissues) were  
592 used to generate tissue-level results.

593

### 594 *Classification of pathogen infection based on serology and culture data using several classifiers*

595 Let  $X$  be a classifier (e.g., the Phecode or a logistic regression classifier) of serology and  
596 culture data based infection for a given pathogen, with probability density  $\varphi_+(x)$  for positive  
597 instances and probability density  $\varphi_-(x)$  for negative instances. The ROC curve plots the  
598 specificity (SP) and sensitivity (SN) at various thresholds:

$$SN(T) = \int_T^{\infty} \varphi_+(x) dx$$

$$SP(T) = 1 - \int_T^{\infty} \varphi_-(x) dx$$

599 The area  $\Omega$  under the curve (AUC) is given by:

$$\Omega = \int_{-\infty}^{\infty} SN(T) SP'(T) dT = \int_{-\infty}^{\infty} \int_T^{\infty} \varphi_+(x) \varphi_-(T) dx dT = \int_{-\infty}^{\infty} \int_{-\infty}^{\infty} I(x > T) \varphi_+(x) \varphi_-(T) dx dT$$

600 where  $I(A)$  is the indicator function, i.e., equal to one if  $(x, T) \in A$  and zero otherwise. The last  
601 equals the probability that the classifier  $X$  ranks a randomly chosen positive instance (of culture  
602 data based infection) higher than a randomly chosen negative instance. We note that the  
603 expression for  $\Omega$  suggests other metrics of interest, for example:



$$\Omega_c = \int_c^1 SN(SP)dSP$$

$$c = \underset{t}{\operatorname{argmin}} \sqrt{(1-t)^2 + (1-SN(t))^2}$$

604 Here  $(c, SN(c))$  is the point on the ROC curve closest to true positive rate of 1 and false positive  
605 rate of 0. We estimated the sampling distribution of  $\Omega$  (including standard error), using  
606 bootstrapping ( $n = 100$ )<sup>97</sup>. We used the pROC package for visualization.

607

### 608 *Leveraging GWAS of human microbiome traits to extend GWAS of ID traits*

609 We leveraged genome-wide associations of microbiome traits, involving 155 pathogens  
610 derived from phylogenetic analysis of 16S rRNA gene sequences<sup>17</sup>.

611

### 612 *Causal inference by Mendelian Randomization*

613 To infer causality between the infectious diseases and potential complications, we  
614 performed Mendelian Randomization (MR<sup>18,21</sup>) in 23,294 individuals of European ancestry in  
615 BioVU. To define instrumental variables (IVs), we clumped the exposure-associated SNPs with  
616 high linkage disequilibrium (LD) using Plink1.9 ( $p < 1 \times 10^{-5}$ ,  $r^2 = 0.01$ ). Only biallelic non-  
617 palindromic variants were considered as IVs. Considering the pervasive horizontal pleiotropy in  
618 human genetic variation<sup>98</sup>, we applied summary statistics based MR-Egger regression<sup>65</sup>. MR-  
619 Egger regression generalizes the inverse-variance weighted method, where the intercept is  
620 assumed to be zero. We also used the weighted-median estimator<sup>66</sup> to test the causal effect of  
621 the exposure trait on the outcome. We leveraged the R package ‘MendelianRandomization’.

622

### 623 *High-throughput Human in vitro Susceptibility Testing (Hi-HOST)*

624 We generated an atlas of TWAS associations with 79 pathogen-induced cellular traits –  
625 including infectivity and replication, cytokine levels, and host cell death<sup>19</sup> using the Hi-HOST

626 platform<sup>99,100</sup>. A list of populations, pathogens and project description may be found at  
627 <http://h2p2.oit.duke.edu/About/>, and phenotype definitions and family-based GWAS of the Hi-  
628 HOST Phenome Project were previously described<sup>19</sup>. Briefly, lymphoblastoid cell lines (LCLs)  
629 from the 1000 Genomes Consortium<sup>101</sup> were obtained from the Coriell Institute. The LCLs  
630 represented diverse populations, including ESN (Esan in Nigeria), GWD (Gambians in Western  
631 Divisions in the Gambia), IBS (Iberian Population in Spain), and KHV (Kinh in Ho Chi Minh City,  
632 Vietnam). LCLs were cultured in RPMI 1640 media containing 10% fetal bovine serum, 2 mM  
633 glutamine, 100 U/ml of penicillin-G, and 100 mg/ml streptomycin for 8 days prior to experimental  
634 use, as previously described<sup>19</sup>. *Chlamydia trachomatis* infection of LCLs was performed using *C.*  
635 *trachomatis* LGV-L2 Rif<sup>R</sup> pGFP::SW2<sup>102</sup>. *Salmonella* infection was performed using  
636 pMMB67GFP<sup>103</sup>, and *sifA* deletion was constructed using lambda red and validated using  
637 PCR<sup>100,104</sup>. *Candida albicans* SC5314 infection was performed as previously described<sup>105</sup> and  
638 levels of fibroblast growth factor 2 were measured using enzyme linked immunosorbent assays.  
639 *Staphylococcus aureus* toxin (alpha-hemolysin) was obtained from Sigma and applied to LCLs  
640 at a concentration of 1 µg/ml for 23 hours. Cell death was measured using 7-AAD staining and  
641 flow cytometry. Additional experimental details can be found at <http://h2p2.oit.duke.edu/About/>.

642 We estimated the gene-level effect size on the Hi-HOST phenotypes, using GWAS  
643 summary statistics<sup>106</sup> in each of the 44 GTEx tissues (version 6p)<sup>107</sup>. The gene expression  
644 prediction model was trained using GTEx as the reference dataset  
645 (<https://zenodo.org/record/3572842/files/GTEx-V6p-HapMap-2016-09-08.tar.gz>). The gene-level  
646 effect size was estimated using S-PrediXcan after allele harmonization<sup>106</sup>. We also applied  
647 MultiXcan to improve the ability to identify potential target genes<sup>15</sup>. In brief, MultiXcan regresses  
648 the cellular trait on the principal components of the predicted expression data across all the  
649 available tissues. For each gene, MultiXcan yields a joint effect estimate across the 44 tissues.  
650 We applied the summary-statistic based version (S-MultiXcan) and followed the guides from the  
651 tool's webpage <https://github.com/hakyimlab/MetaXcan>.

652

653 *Data and software availability*

654 All code is available at the project's GitHub page:

655 <https://github.com/gamazonlab/infectiousDiseaseResource>. Further information and requests

656 for resources and reagents should be directed to and will be fulfilled by the Corresponding

657 Author, Eric R. Gamazon ([eric.gamazon@vanderbilt.edu](mailto:eric.gamazon@vanderbilt.edu)).

658

659

660

661

662

## REFERENCES

- 663  
664  
665 1 Bycroft, C. *et al.* The UK Biobank resource with deep phenotyping and genomic data.  
666 *Nature* **562**, 203-209, doi:10.1038/s41586-018-0579-z (2018).
- 667 2 Roden, D. M. *et al.* Development of a large-scale de-identified DNA biobank to enable  
668 personalized medicine. *Clinical pharmacology and therapeutics* **84**, 362-369,  
669 doi:10.1038/clpt.2008.89 (2008).
- 670 3 Cotsapas, C. *et al.* Pervasive sharing of genetic effects in autoimmune disease. *PLoS*  
671 *Genet* **7**, e1002254, doi:10.1371/journal.pgen.1002254 (2011).
- 672 4 Gamazon, E. R., Zwinderman, A. H., Cox, N. J., Denys, D. & Derks, E. M. Multi-tissue  
673 transcriptome analyses identify genetic mechanisms underlying neuropsychiatric traits.  
674 *Nat Genet* **51**, 933-940, doi:10.1038/s41588-019-0409-8 (2019).
- 675 5 Watanabe, K. *et al.* A global overview of pleiotropy and genetic architecture in complex  
676 traits. *Nat Genet*, doi:10.1038/s41588-019-0481-0 (2019).
- 677 6 Bulik-Sullivan, B. *et al.* An atlas of genetic correlations across human diseases and traits.  
678 *Nat Genet* **47**, 1236-1241, doi:10.1038/ng.3406 (2015).
- 679 7 Gamazon, E. R. *et al.* Using an atlas of gene regulation across 44 human tissues to  
680 inform complex disease- and trait-associated variation. *Nat Genet* **50**, 956-967,  
681 doi:10.1038/s41588-018-0154-4 (2018).
- 682 8 Shi, H., Kichaev, G. & Pasaniuc, B. Contrasting the Genetic Architecture of 30 Complex  
683 Traits from Summary Association Data. *Am J Hum Genet* **99**, 139-153,  
684 doi:10.1016/j.ajhg.2016.05.013 (2016).
- 685 9 Chapman, S. J. & Hill, A. V. Human genetic susceptibility to infectious disease. *Nat Rev*  
686 *Genet* **13**, 175-188, doi:10.1038/nrg3114 (2012).
- 687 10 de Bakker, P. I. & Telenti, A. Infectious diseases not immune to genome-wide  
688 association. *Nat Genet* **42**, 731-732, doi:10.1038/ng0910-731 (2010).
- 689 11 Hill, A. V. The genomics and genetics of human infectious disease susceptibility. *Annu*  
690 *Rev Genomics Hum Genet* **2**, 373-400, doi:10.1146/annurev.genom.2.1.373 (2001).
- 691 12 Ko, D. C. & Urban, T. J. Understanding human variation in infectious disease  
692 susceptibility through clinical and cellular GWAS. *PLoS Pathog* **9**, e1003424,  
693 doi:10.1371/journal.ppat.1003424 (2013).
- 694 13 van de Vosse, E., van Dissel, J. T. & Ottenhoff, T. H. Genetic deficiencies of innate  
695 immune signalling in human infectious disease. *Lancet Infect Dis* **9**, 688-698,  
696 doi:10.1016/s1473-3099(09)70255-5 (2009).
- 697 14 Gamazon, E. R. *et al.* A gene-based association method for mapping traits using  
698 reference transcriptome data. *Nat Genet* **47**, 1091-1098, doi:10.1038/ng.3367 (2015).

- 699 15 Barbeira, A. N. *et al.* Integrating predicted transcriptome from multiple tissues improves  
700 association detection. *PLoS Genet* **15**, e1007889, doi:10.1371/journal.pgen.1007889  
701 (2019).
- 702 16 Locke, A. E. *et al.* Exome sequencing of Finnish isolates enhances rare-variant  
703 association power. *Nature* **572**, 323-328, doi:10.1038/s41586-019-1457-z (2019).
- 704 17 Hughes, D. A. *et al.* Genome-wide associations of human gut microbiome variation and  
705 implications for causal inference analyses. *Nature microbiology* **5**, 1079-1087,  
706 doi:10.1038/s41564-020-0743-8 (2020).
- 707 18 Lawlor, D. A., Harbord, R. M., Sterne, J. A., Timpson, N. & Davey Smith, G. Mendelian  
708 randomization: using genes as instruments for making causal inferences in epidemiology.  
709 *Stat Med* **27**, 1133-1163, doi:10.1002/sim.3034 (2008).
- 710 19 Wang, L. *et al.* An Atlas of Genetic Variation Linking Pathogen-Induced Cellular Traits to  
711 Human Disease. *Cell Host Microbe* **24**, 308-323.e306, doi:10.1016/j.chom.2018.07.007  
712 (2018).
- 713 20 Gusev, A. *et al.* Integrative approaches for large-scale transcriptome-wide association  
714 studies. *Nature genetics* **48**, 245-252, doi:10.1038/ng.3506 (2016).
- 715 21 Davey Smith, G. & Hemani, G. Mendelian randomization: genetic anchors for causal  
716 inference in epidemiological studies. *Human molecular genetics* **23**, R89-98,  
717 doi:10.1093/hmg/ddu328 (2014).
- 718 22 García-Montero, M. *et al.* Pneumonia caused by *Listeria monocytogenes*. *Respiration* **62**,  
719 107-109, doi:10.1159/000196402 (1995).
- 720 23 Lyczak, J. B., Cannon, C. L. & Pier, G. B. Lung infections associated with cystic fibrosis.  
721 *Clin Microbiol Rev* **15**, 194-222, doi:10.1128/cmr.15.2.194-222.2002 (2002).
- 722 24 Balsa, E. *et al.* NDUFA4 is a subunit of complex IV of the mammalian electron transport  
723 chain. *Cell Metab* **16**, 378-386, doi:10.1016/j.cmet.2012.07.015 (2012).
- 724 25 Tartey, S. *et al.* Essential Function for the Nuclear Protein Akirin2 in B Cell Activation  
725 and Humoral Immune Responses. *J Immunol* **195**, 519-527,  
726 doi:10.4049/jimmunol.1500373 (2015).
- 727 26 Tartey, S. *et al.* Akirin2 is critical for inducing inflammatory genes by bridging I $\kappa$ B-  
728 zeta and the SWI/SNF complex. *Embo j* **33**, 2332-2348, doi:10.15252/embj.201488447  
729 (2014).
- 730 27 Revall, K. *et al.* Genome-wide methylation analysis and epigenetic unmasking identify  
731 tumor suppressor genes in hepatocellular carcinoma. *Gastroenterology* **145**, 1424-  
732 1435.e1421-1425, doi:10.1053/j.gastro.2013.08.055 (2013).
- 733 28 Sun, W., Li, J., Jiang, H. G., Ge, L. P. & Wang, Y. Diagnostic value of MUC1 and  
734 EpCAM mRNA as tumor markers in differentiating benign from malignant pleural  
735 effusion. *QJM : monthly journal of the Association of Physicians* **107**, 1001-1007,  
736 doi:10.1093/qjmed/hcu130 (2014).

- 737 29 Power, R. A., Parkhill, J. & de Oliveira, T. Microbial genome-wide association studies:  
738 lessons from human GWAS. *Nature Reviews Genetics* **18**, 41-50,  
739 doi:10.1038/nrg.2016.132 (2017).
- 740 30 Domingo, P. *et al.* Spontaneous rupture of the spleen associated with pneumonia.  
741 *European journal of clinical microbiology & infectious diseases : official publication of the*  
742 *European Society of Clinical Microbiology* **15**, 733-736, doi:10.1007/bf01691960 (1996).
- 743 31 Gerstein, A. R., Riegel, N. & Dennis, M. Ruptured Spleen Simulating Pneumonia. *JAMA*  
744 **199**, 589-589, doi:10.1001/jama.1967.03120080123033 (1967).
- 745 32 Huang da, W., Sherman, B. T. & Lempicki, R. A. Systematic and integrative analysis of  
746 large gene lists using DAVID bioinformatics resources. *Nat Protoc* **4**, 44-57,  
747 doi:10.1038/nprot.2008.211 (2009).
- 748 33 Soderholm, S. *et al.* Phosphoproteomics to Characterize Host Response During  
749 Influenza A Virus Infection of Human Macrophages. *Molecular & cellular proteomics : MCP*  
750 **15**, 3203-3219, doi:10.1074/mcp.M116.057984 (2016).
- 751 34 Stahl, J. A. *et al.* Phosphoproteomic analyses reveal signaling pathways that facilitate  
752 lytic gammaherpesvirus replication. *PLoS Pathog* **9**, e1003583,  
753 doi:10.1371/journal.ppat.1003583 (2013).
- 754 35 Murray, L. A., Sheng, X. & Cristea, I. M. Orchestration of protein acetylation as a toggle  
755 for cellular defense and virus replication. *Nat Commun* **9**, 4967, doi:10.1038/s41467-  
756 018-07179-w (2018).
- 757 36 Taylor, M. P., Koyuncu, O. O. & Enquist, L. W. Subversion of the actin cytoskeleton  
758 during viral infection. *Nat Rev Microbiol* **9**, 427-439, doi:10.1038/nrmicro2574 (2011).
- 759 37 Aktories, K. & Barbieri, J. T. Bacterial cytotoxins: targeting eukaryotic switches. *Nat Rev*  
760 *Microbiol* **3**, 397-410, doi:10.1038/nrmicro1150 (2005).
- 761 38 Yu, B., Cheng, H. C., Brautigam, C. A., Tomchick, D. R. & Rosen, M. K. Mechanism of  
762 actin filament nucleation by the bacterial effector VopL. *Nat Struct Mol Biol* **18**, 1068-  
763 1074, doi:10.1038/nsmb.2110 (2011).
- 764 39 Zahm, J. A. *et al.* The bacterial effector VopL organizes actin into filament-like structures.  
765 *Cell* **155**, 423-434, doi:10.1016/j.cell.2013.09.019 (2013).
- 766 40 Xie, X. *et al.* Systematic discovery of regulatory motifs in human promoters and 3' UTRs  
767 by comparison of several mammals. *Nature* **434**, 338-345, doi:10.1038/nature03441  
768 (2005).
- 769 41 Ammari, M. G., Gresham, C. R., McCarthy, F. M. & Nanduri, B. HPIDB 2.0: a curated  
770 database for host-pathogen interactions. *Database : the journal of biological databases*  
771 *and curation* **2016**, doi:10.1093/database/baw103 (2016).
- 772 42 Na, Y. R. *et al.* The early synthesis of p35 and activation of CDK5 in LPS-stimulated  
773 macrophages suppresses interleukin-10 production. *Science signaling* **8**, ra121-ra121,  
774 doi:10.1126/scisignal.aab3156 (2015).

- 775 43 Patrick, G. N. *et al.* Conversion of p35 to p25 deregulates Cdk5 activity and promotes  
776 neurodegeneration. *Nature* **402**, 615-622, doi:10.1038/45159 (1999).
- 777 44 Tarricone, C. *et al.* Structure and regulation of the CDK5-p25(ncck5a) complex. *Molecular*  
778 *cell* **8**, 657-669 (2001).
- 779 45 Pfänder, P., Fidan, M., Burret, U., Lipinski, L. & Vettorazzi, S. Cdk5 Deletion Enhances  
780 the Anti-inflammatory Potential of GC-Mediated GR Activation During Inflammation.  
781 *Frontiers in Immunology* **10**, doi:10.3389/fimmu.2019.01554 (2019).
- 782 46 Man, A., Slevin, M., Petcu, E. & Fraefel, C. The Cyclin-Dependent Kinase 5 Inhibitor  
783 Peptide Inhibits Herpes Simplex Virus Type 1 Replication. *Scientific reports* **9**, 1260,  
784 doi:10.1038/s41598-018-37989-3 (2019).
- 785 47 Davis, Z. H. *et al.* Global mapping of herpesvirus-host protein complexes reveals a  
786 transcription strategy for late genes. *Molecular cell* **57**, 349-360,  
787 doi:10.1016/j.molcel.2014.11.026 (2015).
- 788 48 Hay, A. J., Wolstenholme, A. J., Skehel, J. J. & Smith, M. H. The molecular basis of the  
789 specific anti-influenza action of amantadine. *Embo j* **4**, 3021-3024 (1985).
- 790 49 Barnard, P., Payne, E. & McMillan, N. A. The human papillomavirus E7 protein is able to  
791 inhibit the antiviral and anti-growth functions of interferon-alpha. *Virology* **277**, 411-419,  
792 doi:10.1006/viro.2000.0584 (2000).
- 793 50 Chellappan, S. *et al.* Adenovirus E1A, simian virus 40 tumor antigen, and human  
794 papillomavirus E7 protein share the capacity to disrupt the interaction between  
795 transcription factor E2F and the retinoblastoma gene product. *Proc Natl Acad Sci U S A*  
796 **89**, 4549-4553, doi:10.1073/pnas.89.10.4549 (1992).
- 797 51 Phelps, W. C., Yee, C. L., Münger, K. & Howley, P. M. The human papillomavirus type  
798 16 E7 gene encodes transactivation and transformation functions similar to those of  
799 adenovirus E1A. *Cell* **53**, 539-547, doi:10.1016/0092-8674(88)90570-3 (1988).
- 800 52 Longworth, M. S. & Laimins, L. A. The binding of histone deacetylases and the integrity  
801 of zinc finger-like motifs of the E7 protein are essential for the life cycle of human  
802 papillomavirus type 31. *J Virol* **78**, 3533-3541, doi:10.1128/jvi.78.7.3533-3541.2004  
803 (2004).
- 804 53 Duro, D. *et al.* Activation of cyclin A gene expression by the cyclin encoded by human  
805 herpesvirus-8. *J Gen Virol* **80 ( Pt 3)**, 549-555, doi:10.1099/0022-1317-80-3-549 (1999).
- 806 54 Ojala, P. M. *et al.* Kaposi's sarcoma-associated herpesvirus-encoded v-cyclin triggers  
807 apoptosis in cells with high levels of cyclin-dependent kinase 6. *Cancer Res* **59**, 4984-  
808 4989 (1999).
- 809 55 Ojala, P. M. *et al.* The apoptotic v-cyclin-CDK6 complex phosphorylates and inactivates  
810 Bcl-2. *Nature cell biology* **2**, 819-825, doi:10.1038/35041064 (2000).

- 811 56 Goldstein, E. J., Citron, D. M., Peraino, V. A. & Cross, S. A. Desulfovibrio desulfuricans  
812 bacteremia and review of human Desulfovibrio infections. *Journal of clinical microbiology*  
813 **41**, 2752-2754, doi:10.1128/jcm.41.6.2752-2754.2003 (2003).
- 814 57 Loubinoux, J., Bronowicki, J. P., Pereira, I. A., Mougengel, J. L. & Faou, A. E. Sulfate-  
815 reducing bacteria in human feces and their association with inflammatory bowel  
816 diseases. *FEMS Microbiol Ecol* **40**, 107-112, doi:10.1111/j.1574-6941.2002.tb00942.x  
817 (2002).
- 818 58 Bastarache, L. *et al.* Phenotype risk scores identify patients with unrecognized  
819 Mendelian disease patterns. *Science (New York, N. Y.)* **359**, 1233-1239,  
820 doi:10.1126/science.aal4043 (2018).
- 821 59 Denny, J. C. *et al.* Systematic comparison of phenome-wide association study of  
822 electronic medical record data and genome-wide association study data. *Nature*  
823 *biotechnology* **31**, 1102-1110, doi:10.1038/nbt.2749 (2013).
- 824 60 Unlu, G. *et al.* Phenome-based approach identifies RIC1-linked Mendelian syndrome  
825 through zebrafish models, biobank associations and clinical studies. *Nat Med* **26**, 98-109,  
826 doi:10.1038/s41591-019-0705-y (2020).
- 827 61 Hagiwara, K. *et al.* Mouse SWAM1 and SWAM2 are antibacterial proteins composed of  
828 a single whey acidic protein motif. *J Immunol* **170**, 1973-1979,  
829 doi:10.4049/jimmunol.170.4.1973 (2003).
- 830 62 Niemöller, U. M. & Täuber, M. G. Brain edema and increased intracranial pressure in the  
831 pathophysiology of bacterial meningitis. *European journal of clinical microbiology &*  
832 *infectious diseases : official publication of the European Society of Clinical Microbiology*  
833 **8**, 109-117, doi:10.1007/bf01963892 (1989).
- 834 63 Suetrong, B. & Walley, K. R. Lactic Acidosis in Sepsis: It's Not All Anaerobic:  
835 Implications for Diagnosis and Management. *Chest* **149**, 252-261, doi:10.1378/chest.15-  
836 1703 (2016).
- 837 64 Isaac, R. *et al.* TM7SF3, a novel p53-regulated homeostatic factor, attenuates cellular  
838 stress and the subsequent induction of the unfolded protein response. *Cell Death Differ*  
839 **24**, 132-143, doi:10.1038/cdd.2016.108 (2017).
- 840 65 Bowden, J., Davey Smith, G. & Burgess, S. Mendelian randomization with invalid  
841 instruments: effect estimation and bias detection through Egger regression. *Int J*  
842 *Epidemiol* **44**, 512-525, doi:10.1093/ije/dyv080 (2015).
- 843 66 Bowden, J., Davey Smith, G., Haycock, P. C. & Burgess, S. Consistent Estimation in  
844 Mendelian Randomization with Some Invalid Instruments Using a Weighted Median  
845 Estimator. *Genetic epidemiology* **40**, 304-314, doi:10.1002/gepi.21965 (2016).
- 846 67 Zheng, T. *et al.* IL-13 receptor alpha2 selectively inhibits IL-13-induced responses in the  
847 murine lung. *J Immunol* **180**, 522-529, doi:10.4049/jimmunol.180.1.522 (2008).



- 848 68 Gómez-Moreno, J., Moar, C., Román, F., Pérez-Maestu, R. & López de Letona, J. M.  
849 Salmonella endocarditis presenting as cerebral hemorrhage. *Eur J Intern Med* **11**, 96-97,  
850 doi:10.1016/s0953-6205(00)00060-1 (2000).
- 851 69 Tian, C. *et al.* Genome-wide association and HLA region fine-mapping studies identify  
852 susceptibility loci for multiple common infections. *Nat Commun* **8**, 599,  
853 doi:10.1038/s41467-017-00257-5 (2017).
- 854 70 Casanova, J. L. Human genetic basis of interindividual variability in the course of  
855 infection. *Proc Natl Acad Sci U S A* **112**, E7118-7127, doi:10.1073/pnas.1521644112  
856 (2015).
- 857 71 Casanova, J. L. Severe infectious diseases of childhood as monogenic inborn errors of  
858 immunity. *Proc Natl Acad Sci U S A* **112**, E7128-7137, doi:10.1073/pnas.1521651112  
859 (2015).
- 860 72 So, H. C. *et al.* Analysis of genome-wide association data highlights candidates for drug  
861 repositioning in psychiatry. *Nat Neurosci* **20**, 1342-1349, doi:10.1038/nn.4618 (2017).
- 862 73 El-Bacha, T. & Da Poian, A. T. Virus-induced changes in mitochondrial bioenergetics as  
863 potential targets for therapy. *The international journal of biochemistry & cell biology* **45**,  
864 41-46, doi:10.1016/j.biocel.2012.09.021 (2013).
- 865 74 Labbé, K. & Saleh, M. Cell death in the host response to infection. *Cell Death Differ* **15**,  
866 1339-1349, doi:10.1038/cdd.2008.91 (2008).
- 867 75 Brouwer, W. P. *et al.* Genome Wide Association Study Identifies Genetic Variants  
868 Associated With Early And Sustained Response To (Peg)Interferon In Chronic Hepatitis  
869 B Patients: The GIANT-B Study. *Clinical infectious diseases : an official publication of*  
870 *the Infectious Diseases Society of America*, doi:10.1093/cid/ciz084 (2019).
- 871 76 Liang, X. *et al.* Macrophage FABP4 is required for neutrophil recruitment and bacterial  
872 clearance in *Pseudomonas aeruginosa* pneumonia. *Faseb j* **33**, 3562-3574,  
873 doi:10.1096/fj.201802002R (2019).
- 874 77 Pan, Y. *et al.* Survival of tissue-resident memory T cells requires exogenous lipid uptake  
875 and metabolism. *Nature* **543**, 252-256, doi:10.1038/nature21379 (2017).
- 876 78 Saitoh, T. *et al.* Atg9a controls dsDNA-driven dynamic translocation of STING and the  
877 innate immune response. *Proc Natl Acad Sci U S A* **106**, 20842-20846,  
878 doi:10.1073/pnas.0911267106 (2009).
- 879 79 Sharfe, N., Dadi, H. K., Shahar, M. & Roifman, C. M. Human immune disorder arising  
880 from mutation of the alpha chain of the interleukin-2 receptor. *Proc Natl Acad Sci U S A*  
881 **94**, 3168-3171, doi:10.1073/pnas.94.7.3168 (1997).
- 882 80 Tsuboi, S. & Meerloo, J. Wiskott-Aldrich syndrome protein is a key regulator of the  
883 phagocytic cup formation in macrophages. *The Journal of biological chemistry* **282**,  
884 34194-34203, doi:10.1074/jbc.M705999200 (2007).

- 885 81 Walenna, N. F. *et al.* Chlamydia pneumoniae exploits adipocyte lipid chaperone FABP4  
886 to facilitate fat mobilization and intracellular growth in murine adipocytes. *Biochem*  
887 *Biophys Res Commun* **495**, 353-359, doi:10.1016/j.bbrc.2017.11.005 (2018).
- 888 82 Willis, K. L., Patel, S., Xiang, Y. & Shisler, J. L. The effect of the vaccinia K1 protein on  
889 the PKR-eIF2alpha pathway in RK13 and HeLa cells. *Virology* **394**, 73-81,  
890 doi:10.1016/j.virol.2009.08.020 (2009).
- 891 83 Yu, Z. *et al.* USP1-UAF1 deubiquitinase complex stabilizes TBK1 and enhances antiviral  
892 responses. *The Journal of experimental medicine* **214**, 3553-3563,  
893 doi:10.1084/jem.20170180 (2017).
- 894 84 Zhang, X. *et al.* Human intracellular ISG15 prevents interferon-alpha/beta over-  
895 amplification and auto-inflammation. *Nature* **517**, 89-93, doi:10.1038/nature13801 (2015).
- 896 85 Lanzi, G. *et al.* A novel primary human immunodeficiency due to deficiency in the  
897 WASP-interacting protein WIP. *The Journal of experimental medicine* **209**, 29-34,  
898 doi:10.1084/jem.20110896 (2012).
- 899 86 Herman, M. *et al.* Heterozygous TBK1 mutations impair TLR3 immunity and underlie  
900 herpes simplex encephalitis of childhood. *The Journal of experimental medicine* **209**,  
901 1567-1582, doi:10.1084/jem.20111316 (2012).
- 902 87 Bouhaddou, M. *et al.* The Global Phosphorylation Landscape of SARS-CoV-2 Infection.  
903 *Cell*, doi:<https://doi.org/10.1016/j.cell.2020.06.034> (2020).
- 904 88 Goodrich, J. K. *et al.* Genetic Determinants of the Gut Microbiome in UK Twins. *Cell*  
905 *Host Microbe* **19**, 731-743, doi:10.1016/j.chom.2016.04.017 (2016).
- 906 89 Hall, A. B., Tolonen, A. C. & Xavier, R. J. Human genetic variation and the gut  
907 microbiome in disease. *Nat Rev Genet* **18**, 690-699, doi:10.1038/nrg.2017.63 (2017).
- 908 90 Kurilshikov, A., Wijmenga, C., Fu, J. & Zhernakova, A. Host Genetics and Gut  
909 Microbiome: Challenges and Perspectives. *Trends in immunology* **38**, 633-647,  
910 doi:10.1016/j.it.2017.06.003 (2017).
- 911 91 Taylor, A. E. *et al.* Investigating the possible causal association of smoking with  
912 depression and anxiety using Mendelian randomisation meta-analysis: the CARTA  
913 consortium. *BMJ Open* **4**, e006141, doi:10.1136/bmjopen-2014-006141 (2014).
- 914 92 Denny, J. C. *et al.* PheWAS: demonstrating the feasibility of a phenome-wide scan to  
915 discover gene-disease associations. *Bioinformatics* **26**, 1205-1210,  
916 doi:10.1093/bioinformatics/btq126 (2010).
- 917 93 Wei, W.-Q. *et al.* Evaluating phecodes, clinical classification software, and ICD-9-CM  
918 codes for phenome-wide association studies in the electronic health record. *PLoS one* **12**,  
919 e0175508-e0175508, doi:10.1371/journal.pone.0175508 (2017).
- 920 94 Derks, E. M., Zwinderman, A. H. & Gamazon, E. R. The Relation Between Inflation in  
921 Type-I and Type-II Error Rate and Population Divergence in Genome-Wide Association

- 922 Analysis of Multi-Ethnic Populations. *Behavior genetics* **47**, 360-368,  
923 doi:10.1007/s10519-017-9837-3 (2017).
- 924 95 Price, A. L. *et al.* Principal components analysis corrects for stratification in genome-  
925 wide association studies. *Nat Genet* **38**, 904-909, doi:10.1038/ng1847 (2006).
- 926 96 Wolfe, D., Dudek, S., Ritchie, M. & Pendergrass, S. Visualizing genomic information  
927 across chromosomes with PhenoGram. *BioData Mining* **6**, 18 - 18 (2013).
- 928 97 Efron, B. Bootstrap Methods: Another Look at the Jackknife. *Ann. Statist.* **7**, 1-26,  
929 doi:10.1214/aos/1176344552 (1979).
- 930 98 Jordan, D. M., Verbanck, M. & Do, R. HOPS: a quantitative score reveals pervasive  
931 horizontal pleiotropy in human genetic variation is driven by extreme polygenicity of  
932 human traits and diseases. *Genome Biol* **20**, 222, doi:10.1186/s13059-019-1844-7  
933 (2019).
- 934 99 Ko, D. C. *et al.* Functional genetic screen of human diversity reveals that a methionine  
935 salvage enzyme regulates inflammatory cell death. *Proc Natl Acad Sci U S A* **109**,  
936 E2343-2352, doi:10.1073/pnas.1206701109 (2012).
- 937 100 Ko, D. C. *et al.* A genome-wide in vitro bacterial-infection screen reveals human variation  
938 in the host response associated with inflammatory disease. *Am J Hum Genet* **85**, 214-  
939 227, doi:10.1016/j.ajhg.2009.07.012 (2009).
- 940 101 Auton, A. *et al.* A global reference for human genetic variation. *Nature* **526**, 68-74,  
941 doi:10.1038/nature15393 (2015).
- 942 102 Saka, H. A. *et al.* Quantitative proteomics reveals metabolic and pathogenic properties  
943 of *Chlamydia trachomatis* developmental forms. *Molecular microbiology* **82**, 1185-1203,  
944 doi:10.1111/j.1365-2958.2011.07877.x (2011).
- 945 103 Pujol, C. & Bliska, J. B. The ability to replicate in macrophages is conserved between  
946 *Yersinia pestis* and *Yersinia pseudotuberculosis*. *Infect Immun* **71**, 5892-5899,  
947 doi:10.1128/iai.71.10.5892-5899.2003 (2003).
- 948 104 Datsenko, K. A. & Wanner, B. L. One-step inactivation of chromosomal genes in  
949 *Escherichia coli* K-12 using PCR products. *Proc Natl Acad Sci U S A* **97**, 6640-6645,  
950 doi:10.1073/pnas.120163297 (2000).
- 951 105 Odds, F. C., Brown, A. J. & Gow, N. A. *Candida albicans* genome sequence: a platform  
952 for genomics in the absence of genetics. *Genome Biol* **5**, 230, doi:10.1186/gb-2004-5-7-  
953 230 (2004).
- 954 106 Barbeira, A. N. *et al.* Exploring the phenotypic consequences of tissue specific gene  
955 expression variation inferred from GWAS summary statistics. *Nat Commun* **9**, 1825,  
956 doi:10.1038/s41467-018-03621-1 (2018).
- 957 107 Battle, A., Brown, C. D., Engelhardt, B. E. & Montgomery, S. B. Genetic effects on gene  
958 expression across human tissues. *Nature* **550**, 204-213, doi:10.1038/nature24277  
959 (2017).

960

961 **AUTHOR CONTRIBUTIONS**

962 A.T.H. and E.R.G. conceived and designed the study. A.T.H., D.Z., R.L.S., L.B., S.J.S., D.C.K.,  
963 and E.R.G. contributed new methodologies. A.T.H., D.Z., R.L.S., L.B., L.W., S.S.Z., S.J.S.,  
964 D.C.K., and E.R.G. acquired, processed, and analyzed data. A.T.H. and E.R.G. drafted the  
965 manuscript. All authors critically revised the manuscript for important intellectual content.

966

967 **ACKNOWLEDGEMENTS**

968 A.T.H. is supported by the National Institutes of Health (F30HL143826) and Vanderbilt  
969 University Medical Scientist Training Program (T32GM007347). E.R.G. is supported by the  
970 National Human Genome Research Institute of the National Institutes of Health under Award  
971 Numbers R35HG010718 and R01HG011138. E.R.G. and S.S.Z. are funded by the National  
972 Heart, Lung, & Blood Institute of the National Institutes of Health under Award Number  
973 R01HL133559. The content is solely the responsibility of the authors and does not necessarily  
974 represent the official views of the National Institutes of Health. E.R.G. has also significantly  
975 benefitted from a Fellowship at Clare Hall, University of Cambridge (UK) and is grateful to the  
976 President and Fellows of the college for a stimulating intellectual home. Genomic data are also  
977 supported by individual investigator-led projects including U01-HG004798, R01-NS032830,  
978 RC2-GM092618, P50-GM115305, U01-HG006378, U19-HL065962, and R01-HD074711.  
979 Additional funding sources for BioVU are listed at <https://victr.vanderbilt.edu/pub/biovu/>. L.B. is  
980 supported by R01-LM010685. S.J.S. is supported by an NIH Director's Pioneer and  
981 Transformative Awards DP1-HD086071 and R01-AI145057. D.C.K. is supported by R01-  
982 AI118903, R21-AI144586, and R21-AI146520. D.C.K. and L.W. are supported by R21-AI133305.

983

984 **COMPETING INTERESTS**

985 E.R.G. receives an honorarium from the journal *Circulation Research* of the American Heart  
986 Association, as a member of the Editorial Board. The other authors declare no competing  
987 interests.  
988

989 **FIGURE LEGENDS**

990 **Figure 1.** Overview of ID atlas resource. List of ID traits tested with corresponding Phecode  
 991 (pnewascatalog.org) in parentheses.  
 992  
 993

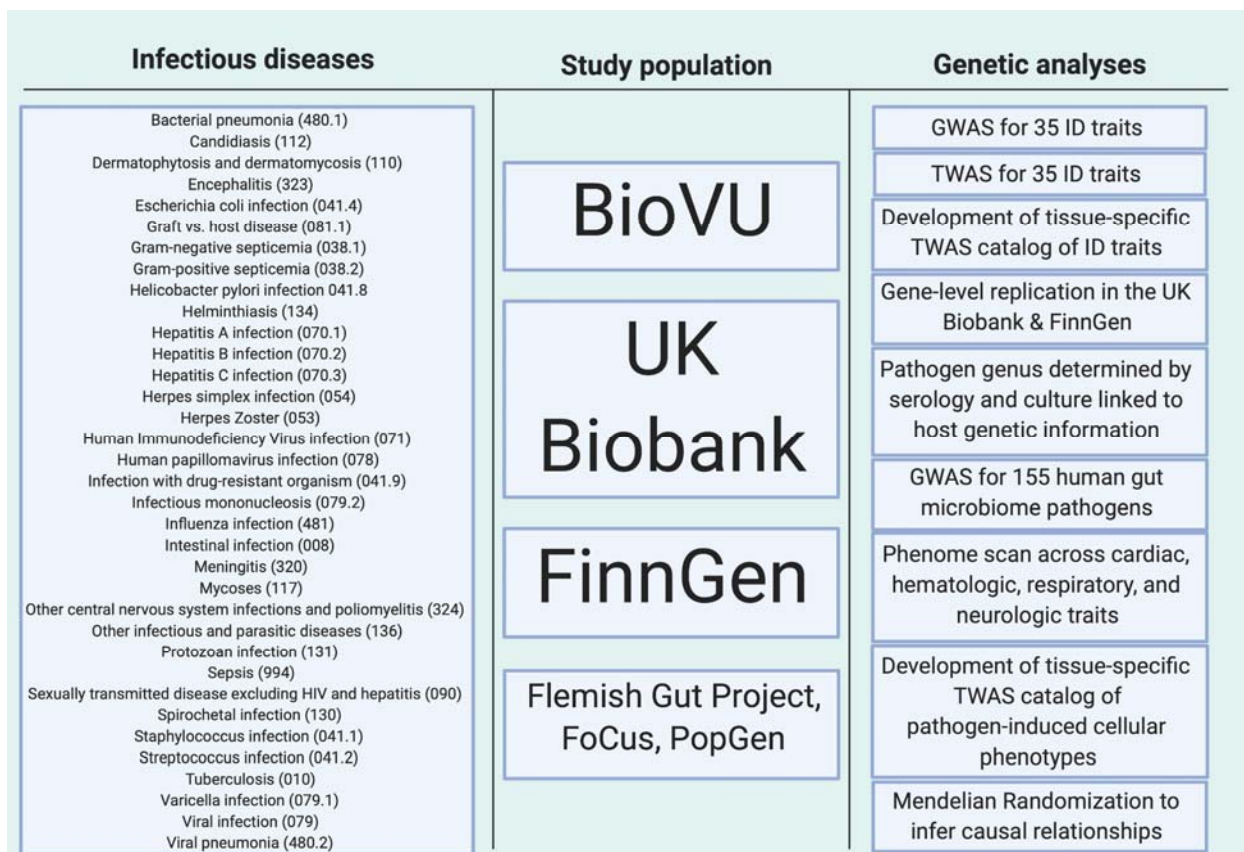

994  
 995

996 **Figure 2.** Genome-wide association study (GWAS) of ID traits. (A) Threshold for inclusion of  
 997 SNP associations was set at  $1.0 \times 10^{-4}$ . Genome-wide significance for an ID trait was set at the  
 998 conventional GWAS threshold  $p = 5.0 \times 10^{-8}$ , as indicated by the horizontal dotted line. The  
 999 subset of 13 ID traits (among the full set tested) with variants that meet the traditional genome-  
 1000 wide significance threshold are included. The top variant association for each of the 13 traits is  
 1001 labeled. The most significant variant association is with bacterial pneumonia ( $p < 1.0 \times 10^{-30}$ ). (B)  
 1002 LocusZoom plot at the sentinel variant, rs17139584, associated with bacterial pneumonia.  
 1003 Several variants in low LD ( $r^2 < 0.20$ ) with the sentinel variant, including variants in the cystic  
 1004 fibrosis gene *CFTR* and in the *MET* gene >650 Kb upstream, are genome-wide significant for  
 1005 bacterial pneumonia. The sentinel variant remains statistically significant ( $p = 0.007$ ) after  
 1006 adjusting for a diagnosis of cystic fibrosis.  
 1007

A

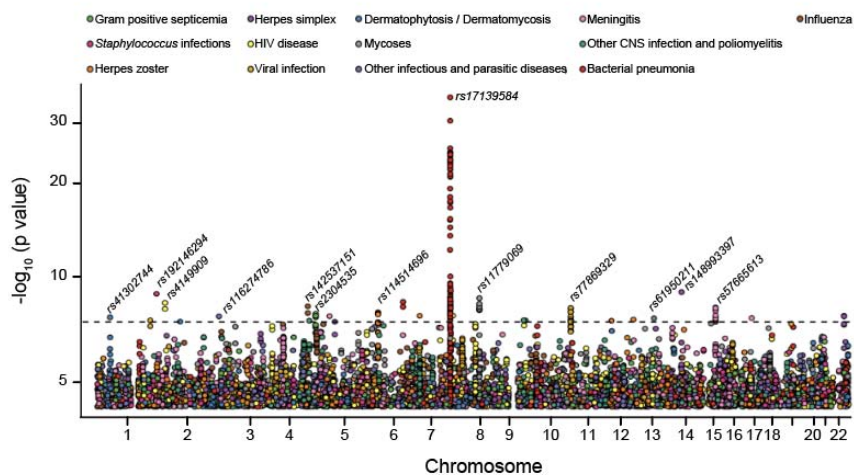

B

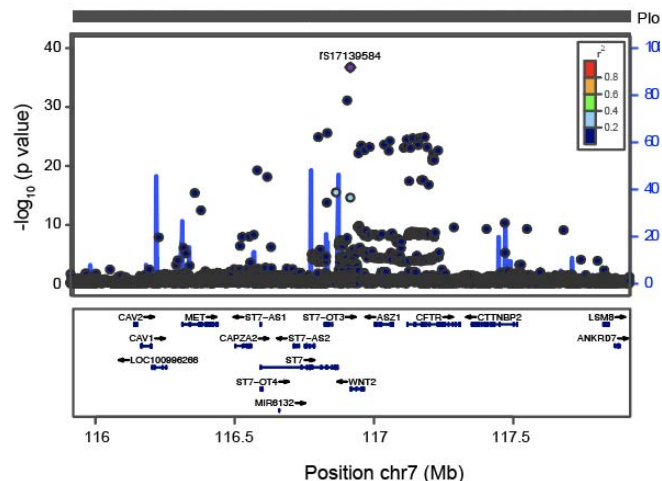

1009

1010 **Figure 3.** Transcriptome-wide association studies (TWAS) of 35 ID traits reveal novel ID-  
1011 associated genes. The genetic component of gene expression for autosomal genes was  
1012 individually tested for association with each of 35 ID traits (see Methods). (A) Experiment-wide  
1013 or ID-specific significant genes are displayed on the ideogram using their chromosomal  
1014 locations and color-coded using the associated ID traits. Most associations represent unique  
1015 genes within the implicated loci, suggesting the genes are not tagging another causal gene. A  
1016 locus on chromosome 9, by contrast, shows multiple associations with the same ID trait, which  
1017 may indicate correlation of the expression traits with a single causal gene in the locus. Circle:  
1018 European ancestry cohort. Diamond: African American ancestry. (B) Manhattan plot shows the  
1019 PrediXcan associations with sepsis (Phecode 994; number of cases 2,921; number of controls  
1020 22,874). Dashed line represents  $p < 5 \times 10^{-5}$ . The gene *IKZF5* was significant ( $p = 8.16 \times 10^{-7}$ ,  
1021 adjusted  $p < 0.05$ ) after Bonferroni correction for the number of genes tested. (C) Q-Q plot of  
1022 FinnGen replication p-values for genes associated with intestinal infection ( $p < 0.05$ ) in BioVU  
1023 (red) compared to the remaining set of genes (black). The ID-associated genes tended to be  
1024 more significant in the independent dataset than the remaining genes, as evidenced by the  
1025 leftward shift in the Q-Q plot. (D) Q-Q plot of UK Biobank replication p-values for influenza in  
1026 lung tissue demonstrating significant deviation from null expectation. The horizontal line  
1027 corresponds to the Bonferroni threshold (adjusted  $p < 0.05$ ). (E) Q-Q plot of the full set of  
1028 FinnGen p-values from the association of gene expression in cerebellum with meningitis (blue)  
1029 vs. the subset of FinnGen (replication) p-values for the top BioVU meningitis gene-level  
1030 associations in cerebellum (red). The meningitis associated genes in BioVU dramatically  
1031 improve signal-to-noise ratio, as shown by the leftward shift in the Q-Q plot. The horizontal line  
1032 corresponds to the Bonferroni threshold (adjusted  $p < 0.05$ ) based on the number of top BioVU  
1033 genes tested.  
1034  
1035



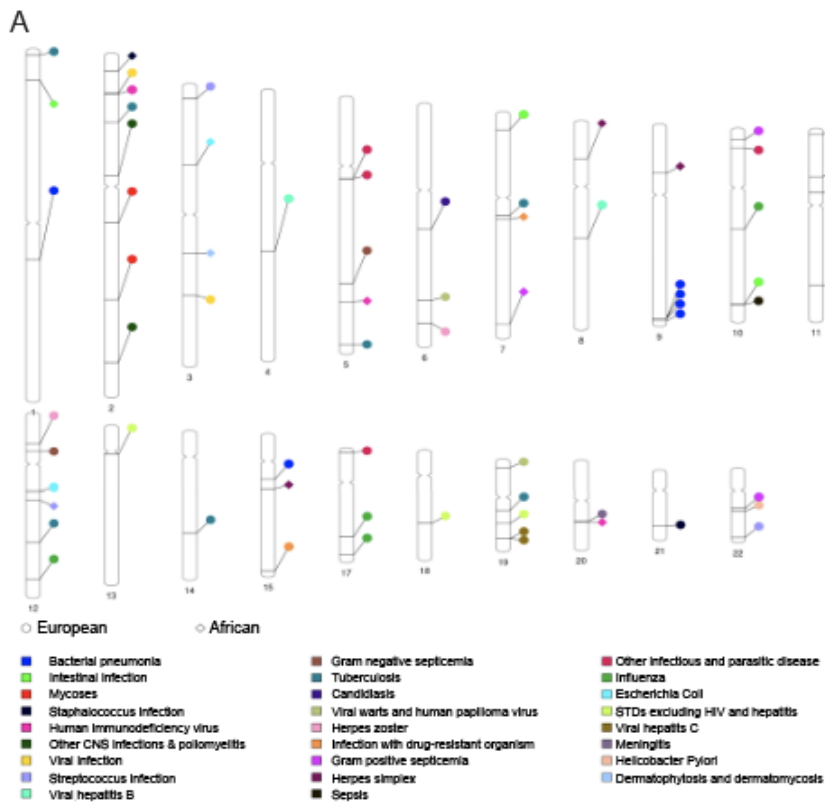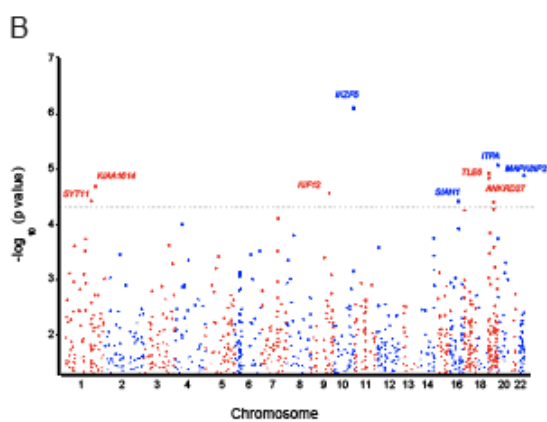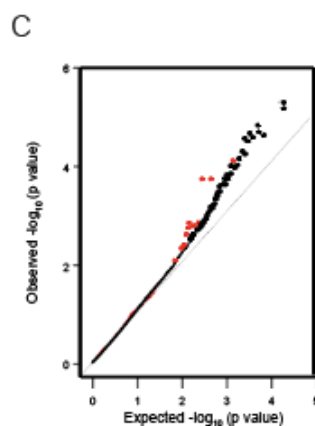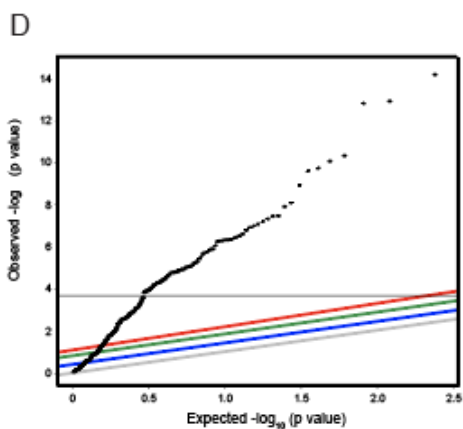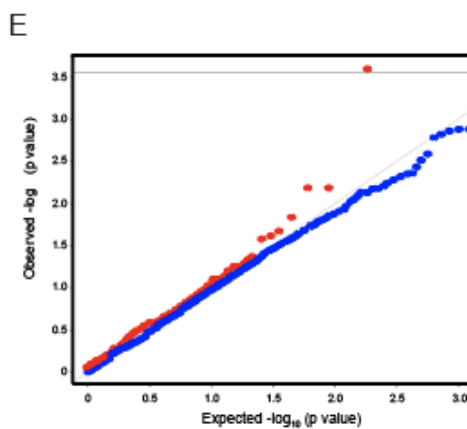

1037 **Figure 4.** Enriched pathways across multiple ID traits and pathogen evolutionary strategies to  
 1038 promote infection. (A) Gene set enrichment analysis of ID associated genes having also  
 1039 nominal associations with additional ID traits. All gene sets satisfied false discovery rate < 0.05  
 1040 for pathway enrichment and included known biological processes (e.g. protein complex  
 1041 formation, cytoskeletal protein binding, cell death, actin motility, etc.) relevant to the biology of  
 1042 infection. (B) Highly conserved motif “TCCCRNNRTGC”, within 4 kb of the transcription start  
 1043 site (TSS) of ID-associated genes, is enriched among the multi-ID associated genes and does  
 1044 not match any known transcription factor binding site. Genes with this motif near the TSS  
 1045 include *AKIRIN2*, *CDK5*, *RAD50*, *PTCD3*, and *CERS3*. This suggests a strategy that the  
 1046 pathogens may broadly exploit to hijack the host transcriptional machinery. (C) CDK5 is an  
 1047 example of a multi-ID associated gene, significantly associated with Gram-positive septicemia  
 1048 and nominally associated with other IDs, including herpes simplex virus. CDK5 is activated by  
 1049 its regulatory subunit p35/p25. The CDK5-p25 complex regulates inflammation (whose large-  
 1050 scale disruption is characteristic of septicemia) and induces cytoskeletal disruption in neurons  
 1051 (where the herpes virus promotes lifelong latent infection). Structure of the CDK5-p25 complex  
 1052 (PDB: 1H4L, <sup>44</sup>) is shown here. The A and B chains are required for cytoskeletal protein binding  
 1053 (CDK5), whereas the D and E chains (p25) are involved in actin regulation and kinase function,  
 1054 all functions implicated in our pathway analysis. (D) Multi-ID associated genes identified by our  
 1055 study have also been observed in host-pathogen protein complexes (by coimmunoprecipitation,  
 1056 affinity chromatography, and two-hybrid approaches, among others) for the specific pathogens  
 1057 responsible for the ID traits. Interactions of pathogen proteins with CDK5 are shown here.  
 1058 M2\_134A1 (UniProt: PO6821) is the matrix protein 2 component of the proton-selective ion  
 1059 channel required for influenza A viral genome release during cellular entry and is targeted by  
 1060 the anti-viral drug amantadine<sup>48</sup>. VE7\_HP16 (UniProt: PO3129) is a component of human  
 1061 papillomavirus (HPV) required for cellular transformation and trans-activation through  
 1062 disassembly of E2F1 transcription factor from RB1 leading to impaired production of type I  
 1063 interferons<sup>49-51</sup>. VE7\_HP31 (UnitProt: P17387) engages histone deacetylases 1 and 2 to  
 1064 promote HPV31 genome maintenance<sup>52</sup>. VCYCL\_HHV8P (UniProt: Q77Q36) is a cyclin  
 1065 homolog within the human herpesvirus 8 genome that has been shown to control cell cycle  
 1066 through CDK6 and induce apoptosis through Bcl2<sup>53-55</sup>. F5HC81\_HHV8 (UniProt: F5HC81) is not  
 1067 well-characterized, but predicted to act as a viral cyclin homolog. This suggests a second  
 1068 strategy that the pathogens exploit, i.e., alteration of the host proteome, to promote infection.

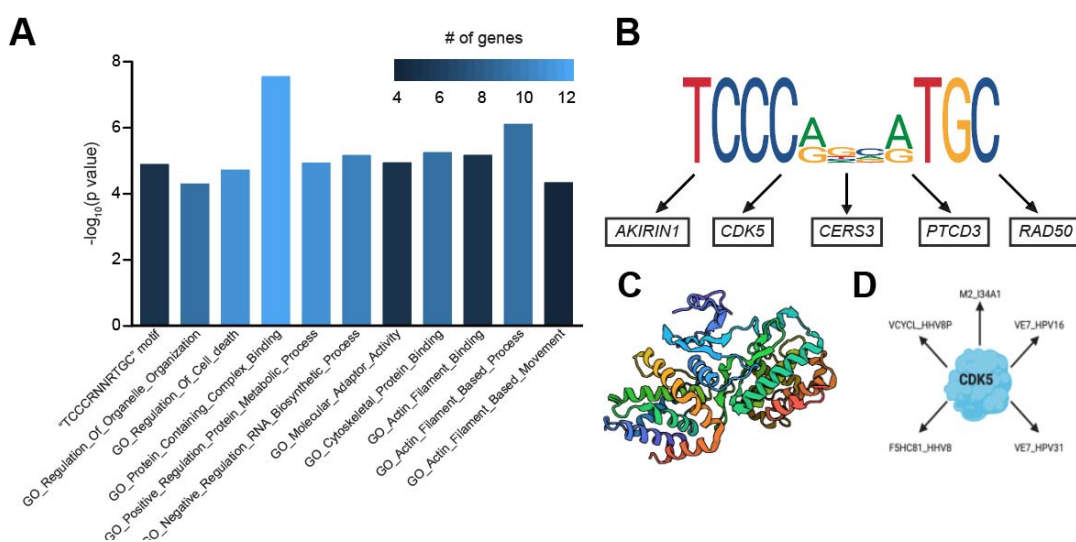

1069  
1070

1071 **Figure 5.** Pathogen genus identification from gut microbiome and clinical blood cultures linked  
1072 to whole-genome information reveals insights into host colonization and infection. (A) Bacterial  
1073 and fungal pathogens identified from blood (n = 7,699 positive cultures across 94 genera) from  
1074 2,417 individuals. (B) Area under the receiver operating characteristic curve (AUC) showing that  
1075 the clinical trait *Staphylococcus* infection (Phecode = 041.1) performs well in classifying  
1076 *Staphylococcus aureus* infection based on blood culture data from (A), with AUC of 0.938 with  
1077 standard error of 0.008. The first PC in the European ancestry samples and a model with age,  
1078 sex, and the first 5 PCs, both with substantially lower performance (AUC of 0.514 and 0.568,  
1079 respectively), are also shown. (C) Q-Q plot of top SNPs ( $p < 0.0001$ ) associated with  
1080 *Desulfovibrionaceae* colonization in the human gut microbiome showing the p-value distribution  
1081 from the association with intestinal infection (Phecode 008) in BioVU. Note the enrichment as  
1082 shown by the leftward shift relative to the diagonal line, with several genes satisfying the  
1083 FDR<0.05 (red line) threshold.  
1084

1085

A

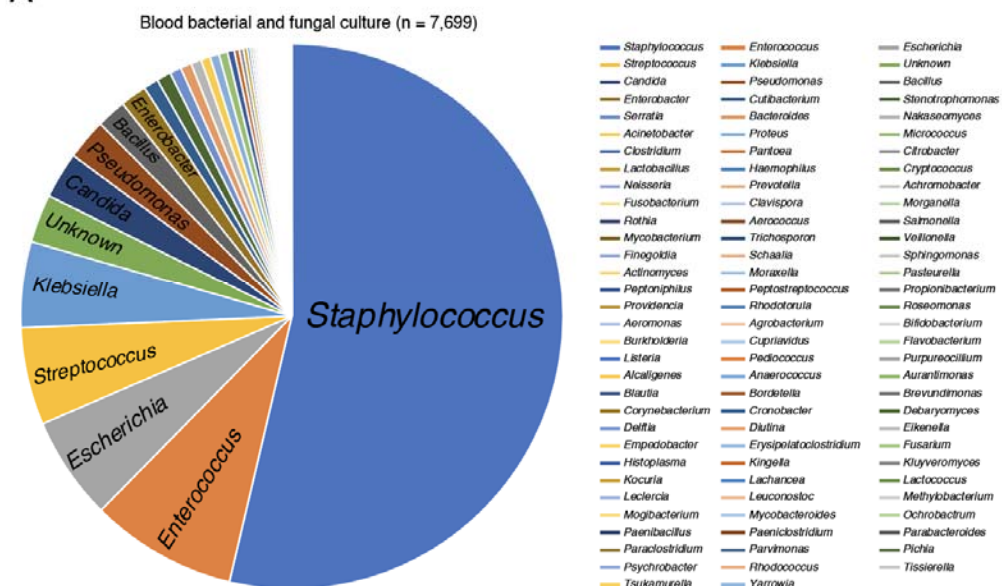

B

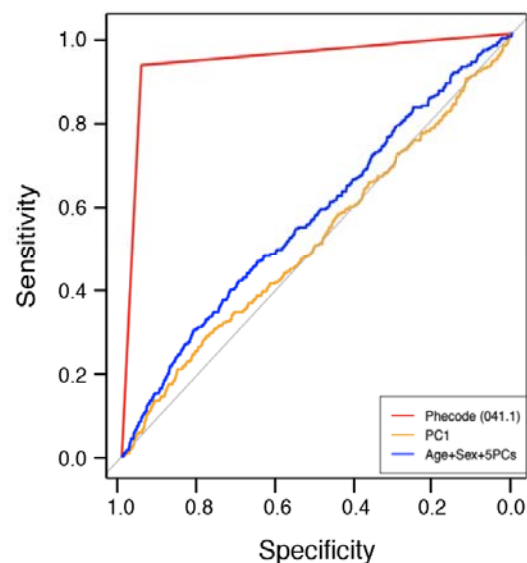

C

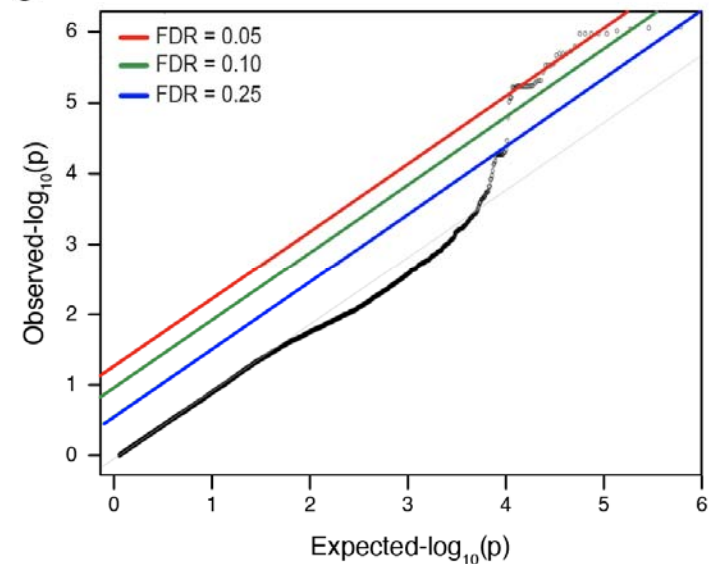

1087

1088 **Figure 6.** Phenome-scale scan of 70 ID-associated genes across 197 cardiovascular,  
1089 hematologic, neurologic, and respiratory phenotypes (cases > 200) in BioVU  
1090 (phewascatalog.org) identifies genes association with both disease risk and corresponding  
1091 known complications of the infection. (A) Each dot represents the association of an ID-  
1092 associated gene with one of the 197 (hematologic, respiratory, cardiovascular, and neurologic)  
1093 phenotypes. Horizontal red line indicates threshold for statistical significance correcting for  
1094 number of phenotypes and ID-associated genes tested. We identify four gene-phenotype pairs  
1095 reaching experiment-wide significance (adjusted  $p < 0.05$ ): 1) *WFDC12*, our most significant ( $p$   
1096 =  $4.23 \times 10^{-6}$ ) association with meningitis, is also associated with cerebral edema and  
1097 compression of brain ( $p = 1.35 \times 10^{-6}$ ), a feared clinical complication of meningitis<sup>62</sup>; 2) *TM7SF3*,  
1098 the most significant gene with Gram-negative sepsis ( $p = 1.37 \times 10^{-6}$ ), is also associated with  
1099 acidosis ( $p = 1.95 \times 10^{-6}$ ), a known metabolic derangement associated with severe sepsis<sup>63</sup>; 3)  
1100 *TXLNB*, the most significant gene associated with viral warts and human papillomavirus  
1101 infection ( $p = 4.35 \times 10^{-6}$ ), is also associated with abnormal involuntary movements,  $p = 1.39 \times 10^{-6}$ ;  
1102 and 4) *RAD18*, the most significant gene associated with Streptococcus infection ( $p = 2.01 \times 10^{-6}$ ),  
1103 is also associated with anemia in neoplastic disease ( $p = 3.10 \times 10^{-6}$ ). (B) Mendelian  
1104 randomization framework. P-value threshold used to define an instrumental variable was set at  
1105  $p < 1.0 \times 10^{-5}$  and variants in linkage equilibrium ( $r^2 = 0.01$ ) were used. (C) Mendelian  
1106 Randomization provides strong support for causal exposure-outcome relationships for 1)  
1107 meningitis and compression of brain (left, median-weighted estimator  $p = 2.7 \times 10^{-3}$ ); and 2)  
1108 gram-negative septicemia and acidosis (right, median-weighted estimator  $p = 2.0 \times 10^{-7}$ ). Grey  
1109 lines indicate 95% confidence interval.

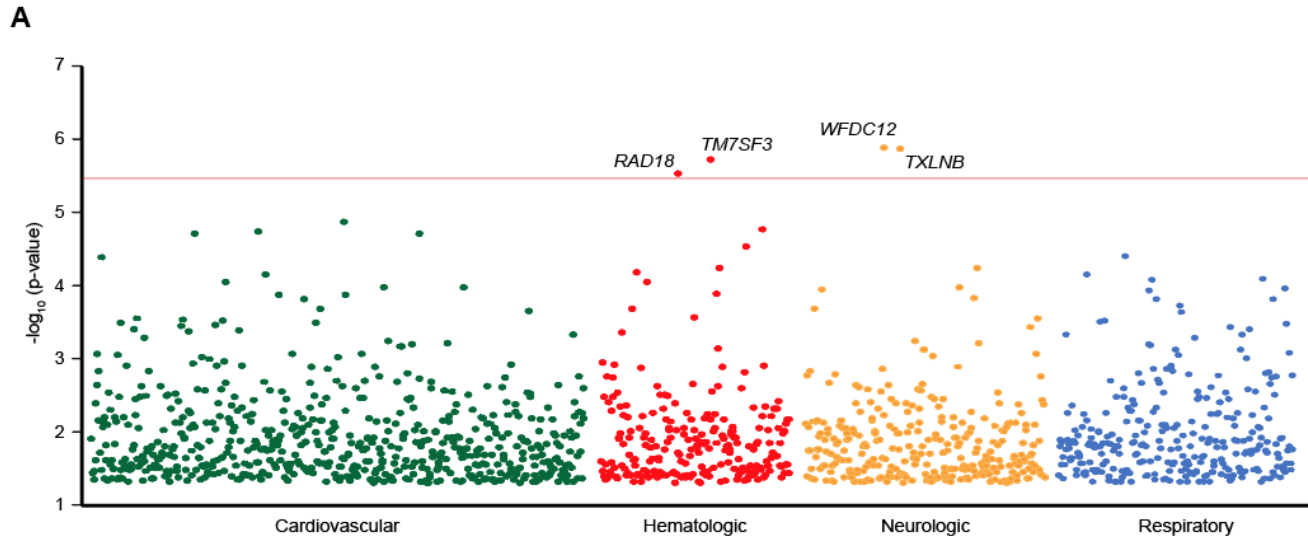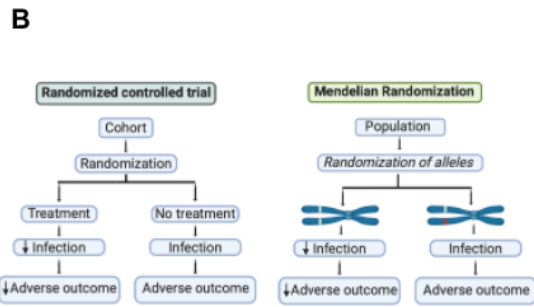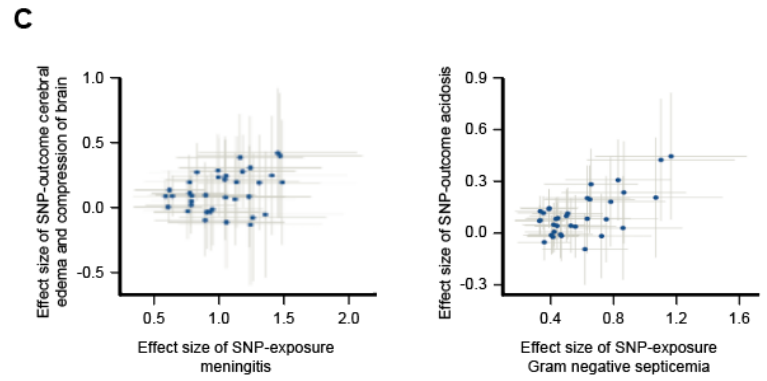

1  
1111

1112 **Figure 7.** TWAS of 79 pathogen-exposure induced cellular traits improves identification of  
 1113 pathogen-induced cellular mechanisms. (A) Genes reaching significance in Hi-HOST after  
 1114 correction for the total number of genes and cellular phenotypes tested. (B) Integration of EHR  
 1115 data into Hi-HOST facilitates replication of gene-level associations with a clinical ID trait. Genes  
 1116 nominally associated ( $p < 0.05$ ) with Gram-positive septicemia (Phecode 038.2) in BioVU show  
 1117 significant enrichment for *Staphylococcus* toxin exposure, a Hi-HOST phenotype. The Q-Q plot  
 1118 shows the distribution of TWAS p-values in the Hi-HOST data for the top genes in the BioVU  
 1119 data. False discovery rate (FDR) thresholds at 0.25 (blue), 0.10 (green), and 0.05 (red) are  
 1120 shown. (C) Integration of EHR data into Hi-HOST also improves the signal-to-noise ratio in Hi-  
 1121 HOST. For example, the top 300 genes nominally associated with *Staphylococcus* infection  
 1122 (Phecode 041.1) in BioVU ( $p < 0.016$ , red) depart from null expectation for their TWAS  
 1123 associations with *Staphylococcus* toxin exposure in Hi-HOST compared to the full set of genes  
 1124 (black).  
 1125  
 1126

A

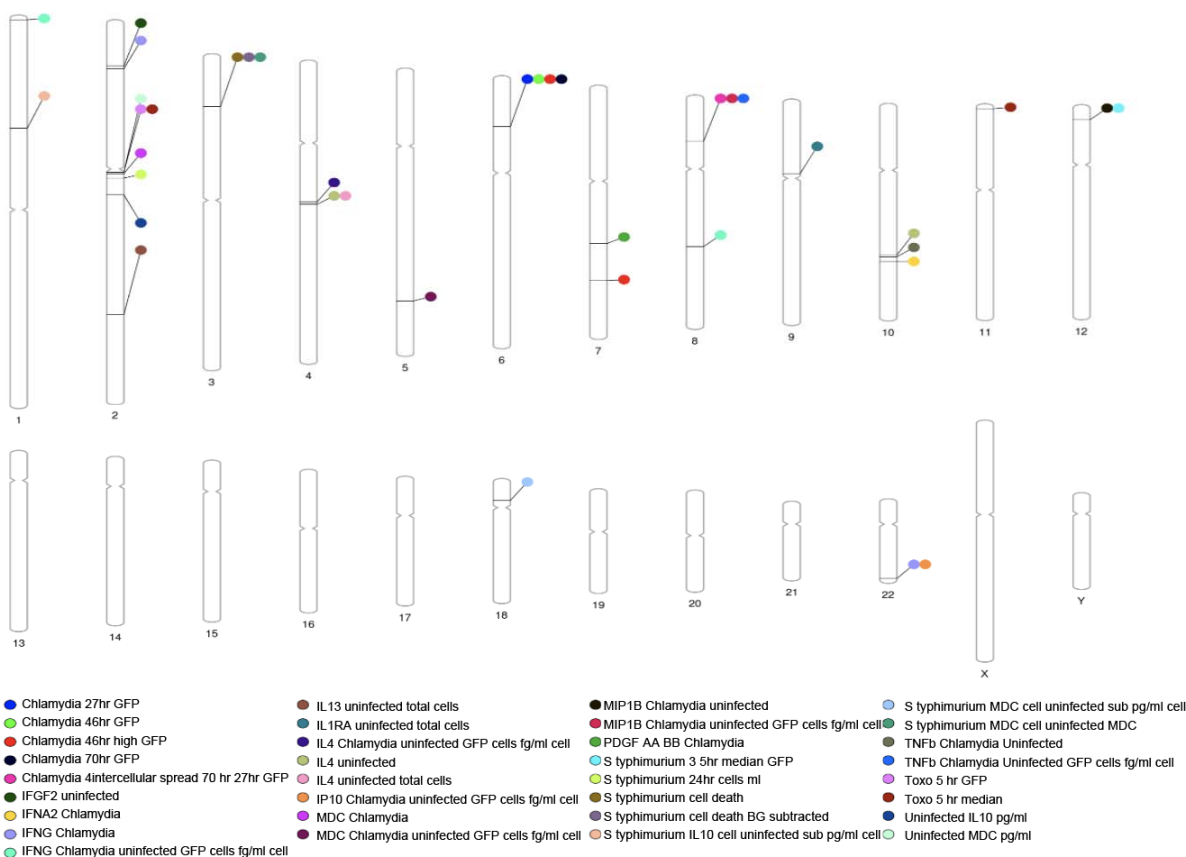

B

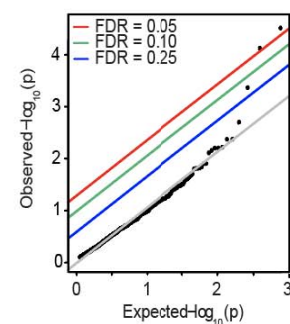

C

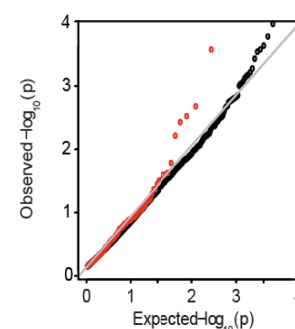

1128

1129

1130 **Table 1.** Significant trait-specific gene-level associations with individual infectious  
 1131 disease phenotypes (for which number of cases > 100). Experiment-wide significant  
 1132 findings (adjusted  $p < 0.05$ ) are noted in **bold**.

1133

| Gene              | Phecode      | Phenotype                                      | Cases        | Controls      | Ancestry        | Odds ratio  | P val         |
|-------------------|--------------|------------------------------------------------|--------------|---------------|-----------------|-------------|---------------|
| IKZF5             | 994          | Sepsis                                         | 2,921        | 22,874        | European        | 0.91        | 8.16x1        |
| AKIRIN2           | 112          | Candidiasis                                    | 2,284        | 21,426        | European        | 0.91        | 2.83x1        |
| PSMG1             | 041.1        | <i>Staphylococcus</i> infection                | 2,180        | 19,844        | European        | 0.90        | 3.13x1        |
| AGTR1             | 079          | Viral infection                                | 1,811        | 20,904        | European        | 1.12        | 1.49x1        |
| SLC35F6           | 079          | Viral infection                                | 1,811        | 20,904        | European        | 0.89        | 3.30x1        |
| <b>NDUFA4</b>     | <b>008</b>   | <b>Intestinal infection</b>                    | <b>1,608</b> | <b>24,187</b> | <b>European</b> | <b>1.16</b> | <b>1.83x1</b> |
| <b>C10orf120</b>  | <b>008</b>   | <b>Intestinal infection</b>                    | <b>1,608</b> | <b>24,187</b> | <b>European</b> | <b>1.13</b> | <b>4.92x1</b> |
| RAD18             | 041.2        | <i>Streptococcus</i> infection                 | 1,262        | 19,844        | European        | 1.16        | 2.01x1        |
| MAPK8IP2          | 041.2        | <i>Streptococcus</i> infection                 | 1,262        | 19,844        | European        | 1.14        | 3.81x1        |
| AVIL              | 041.4        | <i>Escherichia Coli</i>                        | 1,231        | 19,844        | European        | 1.16        | 1.58x1        |
| STAP2             | 078          | Viral warts and human papilloma virus          | 1,152        | 20,904        | European        | 1.15        | 2.33x1        |
| TXLNB             | 078          | Viral warts and human papilloma virus          | 1,152        | 20,904        | European        | 0.86        | 4.35x1        |
| SLCO1A2           | 053          | Herpes zoster                                  | 989          | 20,904        | European        | 0.93        | 1.64x1        |
| CLDN20            | 053          | Herpes zoster                                  | 989          | 20,904        | European        | 0.86        | 4.54x1        |
| IGF2              | 041.9        | Infection with drug-resistant organism         | 893          | 19,844        | European        | 0.83        | 4.01x1        |
| CERS3             | 041.9        | Infection with drug-resistant organism         | 893          | 19,844        | European        | 1.17        | 4.18x1        |
| <b>TOR4A</b>      | <b>480.1</b> | <b>Bacterial pneumonia</b>                     | <b>862</b>   | <b>18,054</b> | <b>European</b> | <b>0.84</b> | <b>5.15x1</b> |
| FAM166A           | 480.1        | Bacterial pneumonia                            | 862          | 18,054        | European        | 1.19        | 1.10x1        |
| C9orf173          | 480.1        | Bacterial pneumonia                            | 862          | 18,054        | European        | 1.18        | 4.48x1        |
| PIP5K1A           | 480.1        | Bacterial pneumonia                            | 862          | 18,054        | European        | 1.16        | 7.00x1        |
| NELFB             | 480.1        | Bacterial pneumonia                            | 862          | 18,054        | European        | 0.86        | 1.87x1        |
| AVEN              | 480.1        | Bacterial pneumonia                            | 862          | 18,054        | European        | 0.85        | 3.31x1        |
| TM7SF3            | 038.1        | Gram negative septicemia                       | 820          | 19,844        | European        | 1.17        | 1.37x1        |
| RAD50             | 038.1        | Gram negative septicemia                       | 820          | 19,844        | European        | 1.17        | 4.50x1        |
| ZNF577            | 070.3        | Viral hepatitis C                              | 808          | 20,904        | European        | 0.84        | 6.21x1        |
| ZNF649            | 070.3        | Viral hepatitis C                              | 808          | 20,904        | European        | 0.85        | 1.85x1        |
| <b>SETD9</b>      | <b>136</b>   | <b>Other infectious and parasitic diseases</b> | <b>746</b>   | <b>24,770</b> | <b>European</b> | <b>0.83</b> | <b>3.04x1</b> |
| <b>AC022431.1</b> | <b>136</b>   | <b>Other infectious and parasitic diseases</b> | <b>746</b>   | <b>24,770</b> | <b>European</b> | <b>1.20</b> | <b>7.92x1</b> |
| MYO1C             | 136          | Other infectious and parasitic diseases        | 746          | 24,770        | European        | 1.10        | 2.97x1        |
| NUDT5             | 136          | Other infectious and parasitic diseases        | 746          | 24,770        | European        | 0.84        | 3.52x1        |
| MAATS1            | 110          | Dermatophytosis and dermatomycosis             | 654          | 3,330         | African         | 0.80        | 4.82x1        |
| <b>PTPN4</b>      | <b>117</b>   | <b>Mycoses</b>                                 | <b>627</b>   | <b>21,426</b> | <b>European</b> | <b>0.79</b> | <b>1.56x1</b> |
| WIPF1             | 117          | Mycoses                                        | 627          | 21,426        | European        | 1.20        | 2.72x1        |
| <b>ALX4</b>       | <b>038.2</b> | <b>Gram positive septicemia</b>                | <b>613</b>   | <b>19,844</b> | <b>European</b> | <b>1.25</b> | <b>4.21x1</b> |
| C22orf31          | 038.2        | Gram positive septicemia                       | 613          | 19,844        | European        | 0.81        | 2.05x1        |
| IL2RA             | 038.2        | Gram positive septicemia                       | 613          | 19,844        | European        | 1.20        | 3.88x1        |
| VVA5B1            | 008          | Intestinal infection                           | 368          | 4,060         | African         | 1.30        | 3.85x1        |
| ATP6V1C2          | 041.1        | <i>Staphylococcus</i> infection                | 358          | 3,337         | African         | 1.33        | 1.51x1        |
| WDR66             | 481          | Influenza                                      | 272          | 18,054        | European        | 0.71        | 3.47x1        |
| FAM20A            | 481          | Influenza                                      | 272          | 18,054        | European        | 0.77        | 1.51x1        |
| HKDC1             | 481          | Influenza                                      | 272          | 18,054        | European        | 1.34        | 2.20x1        |
| ASPSCR1           | 481          | Influenza                                      | 272          | 18,054        | European        | 1.35        | 2.76x1        |
| FAM208A           | 041.4        | <i>Escherichia Coli</i>                        | 243          | 3,337         | African         | 1.42        | 1.15x1        |
| TBK1              | 041.2        | <i>Streptococcus</i> infection                 | 229          | 3,337         | African         | 1.41        | 4.70x1        |
| DNAJC5G           | 071          | Human immunodeficiency virus                   | 196          | 20,904        | European        | 1.08        | 7.36x1        |
| FABP4             | 070.2        | Viral hepatitis B                              | 166          | 20,904        | European        | 0.70        | 4.39x1        |
| ANK2              | 070.2        | Viral hepatitis B                              | 166          | 20,904        | European        | 0.77        | 4.56x1        |
| HIP1              | 041.9        | Infection with drug-resistant organism         | 165          | 3,337         | African         | 1.46        | 6.74x1        |
| C11orf53          | 041.9        | Infection with drug-resistant organism         | 165          | 3,337         | African         | 0.72        | 4.98x1        |
| <b>EPCAM</b>      | <b>010</b>   | <b>Tuberculosis</b>                            | <b>156</b>   | <b>19,844</b> | <b>European</b> | <b>1.40</b> | <b>5.04x1</b> |
| <b>AL589739.1</b> | <b>010</b>   | <b>Tuberculosis</b>                            | <b>156</b>   | <b>19,844</b> | <b>European</b> | <b>1.55</b> | <b>9.46x1</b> |
| PROX2             | 010          | Tuberculosis                                   | 156          | 19,844        | European        | 1.40        | 9.70x1        |
| USP44             | 010          | Tuberculosis                                   | 156          | 19,844        | European        | 1.44        | 1.07x1        |
| GPRIN1            | 010          | Tuberculosis                                   | 156          | 19,844        | European        | 1.49        | 2.55x1        |
| NSUN5             | 010          | Tuberculosis                                   | 156          | 19,844        | European        | 0.75        | 2.76x1        |
| C19orf55/PROSER3  | 010          | Tuberculosis                                   | 156          | 19,844        | European        | 1.51        | 3.30x1        |
| DNAJC17           | 054          | Herpes simplex                                 | 154          | 3,241         | African         | 0.65        | 2.75x1        |
| CHMP5             | 054          | Herpes simplex                                 | 154          | 3,241         | African         | 1.36        | 2.22x1        |



|              |            |                                                             |            |               |                 |             |               |
|--------------|------------|-------------------------------------------------------------|------------|---------------|-----------------|-------------|---------------|
| GNRH1        | 054        | Herpes simplex                                              | 154        | 3,241         | African         | 1.47        | 4.64x1        |
| TXNL1        | 152        | Sexually transmitted infections excluding HIV and hepatitis | 152        | 25,643        | European        | 0.64        | 3.92x1        |
| LTBP4        | 152        | Sexually transmitted infections excluding HIV and hepatitis | 152        | 25,643        | European        | 0.70        | 2.13x1        |
| CRYL1        | 152        | Sexually transmitted infections excluding HIV and hepatitis | 152        | 25,643        | European        | 0.70        | 2.23x1        |
| LIMK2        | 041.8      | Helicobacter Pylori                                         | 150        | 19,844        | European        | 0.71        | 2.88x1        |
| WFDC12       | 320        | Meningitis                                                  | 144        | 25,170        | European        | 1.16        | 4.23x1        |
| TNNC2        | 071        | Human immunodeficiency virus                                | 139        | 3,241         | African         | 1.44        | 2.49x1        |
| PRELID2      | 071        | Human immunodeficiency virus                                | 139        | 3,241         | African         | 1.47        | 2.68x1        |
| <b>PTCD3</b> | <b>324</b> | <b>Other CNS infections and poliomyelitis</b>               | <b>136</b> | <b>25,170</b> | <b>European</b> | <b>0.89</b> | <b>3.74x1</b> |
| ATG9A        | 324        | Other CNS infections and poliomyelitis                      | 136        | 25,170        | European        | 0.76        | 2.46x1        |
| EIF3M        | 078        | Viral warts and human papilloma virus                       | 136        | 3,241         | African         | 1.48        | 3.22x1        |
| CDK5         | 038.2      | Gram positive septicemia                                    | 114        | 3,337         | African         | 0.65        | 3.64x1        |

1134

1135

1136

1137

1138

1139

1140
