1 **The genetic architecture of human infectious diseases and pathogen-**  
2 **induced cellular phenotypes**

3  
4 **Authors:** Andrew T. Hale<sup>1,2</sup>, Dan Zhou<sup>2</sup>, Lisa Bastarache<sup>3</sup>, Liuyang Wang<sup>4,5</sup>, Sandra S. Zinkel<sup>6</sup>,  
5 Steven J. Schiff<sup>7</sup>, Dennis C. Ko<sup>4</sup>, and Eric R. Gamazon<sup>2,8,9,10\*</sup>

6  
7 <sup>1</sup>Vanderbilt University School of Medicine, Medical Scientist Training Program, Nashville, TN.

8 <sup>2</sup>Vanderbilt Genetics Institute & Division of Genetic Medicine, Vanderbilt University Medical  
9 Center, Nashville, TN.

10 <sup>3</sup>Department of Bioinformatics, Vanderbilt University School of Medicine, Nashville, TN.

11 <sup>4</sup>Department of Molecular Genetics and Microbiology, Duke University School of Medicine,  
12 Durham, NC.

13 <sup>5</sup>Division of Infectious Diseases, Department of Medicine, Duke University School of Medicine,  
14 Durham, NC.

15 <sup>6</sup>Division of Hematology and Oncology, Vanderbilt University Medical Center, Nashville, TN

16 <sup>7</sup>Center for Neural Engineering and Infectious Disease Dynamics, Departments of  
17 Neurosurgery, Engineering Science and Mechanics, and Physics, Penn State University.  
18 University Park, PA.

19 <sup>8</sup>Clare Hall, University of Cambridge, Cambridge, UK.

20 <sup>9</sup>MRC Epidemiology Unit, University of Cambridge, Cambridge, UK

21 <sup>10</sup>Lead Contact.

22

23 \* Correspondence and requests for materials should be addressed to E.R.G.

24 ([eric.gamazon@vanderbilt.edu](mailto:eric.gamazon@vanderbilt.edu))

25

26 **SUMMARY**

27

28 Infectious diseases (ID) represent a significant proportion of morbidity and mortality across the  
29 world. Host genetic variation is likely to contribute to ID risk and downstream clinical outcomes,  
30 but there is a need for a genetics-anchored framework to decipher molecular mechanisms of  
31 disease risk, infer causal effect on potential complications, and identify instruments for drug  
32 target discovery. Here we perform transcriptome-wide association studies (TWAS) of 35 clinical  
33 ID traits in a cohort of 23,294 individuals, identifying 70 gene-level associations with 26 ID traits.  
34 Replication in two large-scale biobanks provides additional support for the identified  
35 associations. A phenome-scale scan of the 70 gene-level associations across hematologic,  
36 respiratory, cardiovascular, and neurologic traits proposes a molecular basis for known  
37 complications of the ID traits. Using Mendelian Randomization, we then provide causal support  
38 for the effect of the ID traits on adverse outcomes. The rich resource of genetic information  
39 linked to serologic tests and pathogen cultures from bronchoalveolar lavage, sputum,  
40 sinus/nasopharyngeal, tracheal, and blood samples (up to 7,699 positive pathogen cultures  
41 across 92 unique genera) that we leverage provides a platform to interrogate the genetic basis  
42 of compartment-specific infection and colonization. To accelerate insights into cellular  
43 mechanisms, we develop a TWAS repository of gene-level associations in a broad collection of  
44 human tissues with 79 pathogen-exposure induced cellular phenotypes as a discovery and  
45 replication platform. Cellular phenotypes of infection by 8 pathogens included pathogen  
46 invasion, intercellular spread, cytokine production, and pyroptosis. These rich datasets will  
47 facilitate mechanistic insights into the role of host genetic variation on ID risk and  
48 pathophysiology, with important implications for our molecular understanding of potentially  
49 severe phenotypic outcomes.

50

51

52 **Keywords:** PrediXcan; Human Genetics; Infectious Disease; Transcriptomics; TWAS; GWAS;

53 Electronic Health Records; Hi-HOST; BioVU; UK Biobank; FinnGen; Functional Genomics;

54 GTEx; Phenome Scan: PheWAS; Mendelian Randomization; Clinical Microbiology

55

56 **HIGHLIGHTS**

57

58 • Atlas of genome-wide association studies (GWAS) and transcriptome-wide association  
59 studies (TWAS) results for 35 clinical infectious disease (ID) phenotypes, with genome-  
60 wide and transcriptome-wide significant results for 13 and 26 clinical ID traits,  
61 respectively

62

63 • Phenome-scale scan of ID-associated genes across 197 hematologic, respiratory,  
64 cardiovascular, and neurologic traits, facilitating identification of genes associated with  
65 known complications of the ID traits

66

67 • Mendelian Randomization analysis, leveraging naturally occurring DNA sequence  
68 variation to perform “randomized controlled trials” to test the causal effect of ID traits on  
69 potential outcomes and complications

70

71 • A genomic resource of TWAS associations for 79 pathogen-induced cellular traits from  
72 High-throughput Human *in vitro* Susceptibility Testing (Hi-HOST) across 44 tissues as a  
73 discovery and replication platform to enable *in silico* cellular microbiology and functional  
74 genomic experiments

75

76

77

## 78 INTRODUCTION

79 Genome-wide association studies (GWAS) and large-scale DNA biobanks with  
80 phenome-scale information are making it possible to identify the genetic basis of a wide range  
81 of complex traits in humans (Bycroft et al., 2018; Roden et al., 2008). A parallel development is  
82 the increasing availability of GWAS summary statistics, facilitating genetic analyses of entire  
83 disease classes and promising considerably improved resolution of genetic effects on human  
84 disease (Cotsapas et al., 2011; Gamazon et al., 2019). Recent analysis involving 558 well-  
85 powered GWAS results found that trait-associated loci cover ~50% of the genome, enriched in  
86 both coding and regulatory regions, and of these, ~90% are implicated in multiple traits  
87 (Watanabe et al., 2019). However, the breadth of clinical and biological information in these  
88 datasets will require new methodologies and additional high-dimensional data to advance our  
89 understanding of the genetic architecture of complex traits and relevant molecular mechanisms  
90 (Bulik-Sullivan et al., 2015; Gamazon et al., 2018; Shi et al., 2016). Approaches to  
91 understanding the functional consequences of implicated loci and genes are needed to  
92 determine causal pathways and potential mechanisms for pharmacological intervention.

93 The genetic basis of infectious disease (ID) risk and severity has been relatively  
94 understudied, and its implications for etiological understanding of human disease and drug  
95 target discovery may be investigated using phenome-scale information increasingly available in  
96 these biobanks. ID risk and pathogenesis is likely to be multifactorial, resulting from a complex  
97 interplay of host genetic variation, environmental exposure, and pathogen-specific molecular  
98 mechanisms. With few exceptions, the extent to which susceptibility to ID is correlated with host  
99 genetic variation remains poorly understood (de Bakker and Telenti, 2010). However, for at  
100 least some ID traits, including poliomyelitis, hepatitis, and *Helicobacter pylori* (Burgner et al.,  
101 2006; Herndon and Jennings, 1951; Hohler et al., 2002; Malaty et al., 1994), disease risk is  
102 heritable, based on twin studies. Although monogenic mechanisms of ID risk have been

103 demonstrated (Casanova, 2015a, b), the contribution of variants across the entire allele  
104 frequency spectrum to interindividual variability in ID risk remains largely unexplored.

105 Here we conduct genome-wide association studies (GWAS) and transcriptome-wide  
106 association studies (TWAS) of 35 ID traits. To implement the latter, we apply PrediXcan  
107 (Gamazon et al., 2018; Gamazon et al., 2015), which exploits the genetic component of gene  
108 expression to probe the molecular basis of disease risk. We combine information across a  
109 broad collection of tissues to determine gene-level associations using a multi-tissue approach,  
110 which displays markedly improved statistical power over a single-tissue approach (Barbeira et  
111 al., 2019; Gamazon et al., 2018; Gamazon et al., 2015). Notably, we identify 70 gene-level  
112 associations for 26 of 35 ID traits, i.e., heretofore referred to as ID-associated genes, and  
113 conduct replication using the corresponding traits in the UK Biobank and FinnGen consortia  
114 data (Bycroft et al., 2018; Locke et al., 2019). The rich resource of genetic information linked to  
115 clinical microbiology information that we leverage provides a platform to interrogate the genetic  
116 basis of compartment-specific infection and colonization. To gain insights into the phenotypic  
117 consequences of ID-associated genes, including adverse outcomes and complications, we  
118 perform a phenome-scale scan across hematologic, respiratory, cardiovascular, and neurologic  
119 traits. To extend these findings, we use a Mendelian Randomization framework (Lawlor et al.,  
120 2008) to conduct causal inference on the effect of a clinical ID trait on an adverse clinical  
121 outcome. To elucidate the cellular mechanisms through which host genetic variation influences  
122 disease risk, we generate an atlas of gene-level associations with 79 pathogen-induced cellular  
123 phenotypes determined by High-throughput Human *in vitro* Susceptibility Testing (Hi-HOST)  
124 (Wang et al., 2018) as a discovery and replication platform. The rich genomic resource we  
125 generate and the methodology we develop promise to accelerate discoveries on the molecular  
126 mechanisms of infection, improve our understanding of adverse outcomes and complications,  
127 and enable prioritization of new therapeutic targets.

128

## 129 RESULTS

130 A schematic diagram illustrating our study design and the reference resource we provide  
131 can be found in Figure 1. Here we analyzed 35 clinical ID traits, 79 pathogen-exposure-induced  
132 cellular traits, and 197 (cardiovascular, hematologic, neurologic, and respiratory) traits. We  
133 performed GWAS and TWAS (Gamazon et al., 2015; Gusev et al., 2016) to investigate the  
134 genetic basis of the ID traits and their potential adverse outcomes and complications. We  
135 conducted causal inference within a Mendelian Randomization framework (Davey Smith and  
136 Hemani, 2014), exploiting genetic instruments for naturally “randomized controlled trials” to  
137 evaluate the causality of an observed association between a modifiable exposure or risk factor  
138 and a clinical phenotype. We generate a rich resource for understanding the genetic and  
139 molecular basis of infection and potential adverse effects and complications.

140

141 *GWAS and TWAS of 35 infectious disease clinical phenotypes implicate broad range of*  
142 *molecular mechanisms*

143 We sought to characterize the genetic determinants of 35 ID traits, including many which  
144 have never been investigated using a genome-wide approach. First, we performed GWAS of  
145 each of these phenotypes using a cohort of 23,294 patients of European ancestry with  
146 extensive EHR information from the BioVU (Roden et al., 2008). We identified genome-wide  
147 significant associations ( $p < 5 \times 10^{-8}$ ) for 13 ID traits (Figure 2A and Supplementary Table 1). The  
148 SNP rs17139584 on chromosome 7 was our most significant association ( $p = 1.21 \times 10^{-36}$ )  
149 across all traits, with bacterial pneumonia. A LocusZoom plot shows several additional genome-  
150 wide significant variants in the locus (Figure 2B), in low linkage disequilibrium ( $r^2 < 0.20$ ) with  
151 the sentinel variant rs17139584, including variants in the *MET* gene and in *CFTR*. The *MET*  
152 gene acts as a receptor to *Listeria monocytogenes* internalin InIB, mediating entry into host  
153 cells; interestingly, listeriosis, a bacterial infection caused by this pathogen, can lead to  
154 pneumonia (García-Montero et al., 1995). Given the observed associations in the cystic fibrosis

155 gene *CFTR* (~650 Kb downstream of *MET*), we also asked whether the rs17139584 association  
156 was driven by cystic fibrosis. Notably, the SNP remained nominally significant, though its  
157 significance was substantially reduced, after adjusting for cystic fibrosis status ( $p = 0.007$ ; see  
158 Methods) or excluding the cystic fibrosis cases ( $p = 0.02$ ). The LD profile of the genome-wide  
159 significant results in this locus (Figure 2B) is consistent with the involvement of multiple gene  
160 mechanisms (e.g., *MET* and *CFTR*) underlying bacterial pneumonia risk. The rs17139584  
161 association replicated ( $p = 5.3 \times 10^{-3}$ ) in the UK Biobank (Bycroft et al., 2018) (Supplementary  
162 Table 2). Eighty percent to ninety percent of patients with cystic fibrosis suffer from respiratory  
163 failure due to chronic bacterial infection (with *Pseudomonas aeruginosa*) (Lyczak et al., 2002).  
164 Thus, future studies on the role of this locus in lung infection associated with cystic fibrosis may  
165 provide germline predictors of this complication; alternatively, the locus may confer susceptibility  
166 to lung inflammation, regardless of cystic fibrosis status. Collectively, our analysis shows strong  
167 support for allelic heterogeneity, with likely multiple independent variants in the locus  
168 contributing to interindividual variability in bacterial pneumonia susceptibility.

169 Additional examples of genome-wide significant associations with other ID traits were  
170 identified. For example, rs192146294 on chromosome 1 was significantly associated ( $p =$   
171  $1.23 \times 10^{-9}$ ) with *Staphylococcus* infection. In addition, 10 variants on chromosome 8 were  
172 significantly associated ( $p < 1.17 \times 10^{-8}$ ) with Mycoses infection.

173 Next, to improve statistical power, we performed multi-tissue PrediXcan (Barbeira et al.,  
174 2019; Gamazon et al., 2018; Gamazon et al., 2015). We constructed an atlas of TWAS  
175 associations with these ID traits in separate European and African American ancestry cohorts  
176 (Supplementary Data File 1) as a resource to facilitate mechanistic studies. Notably, 70 genes  
177 reached experiment-wide or individual ID-trait significance for 26 of the 35 clinical ID traits  
178 (Figure 3A and Table 1). Sepsis, the clinical ID trait with the largest sample size in our data  
179 (Figure 3B; Phecode 994; number of cases 2,921; number of controls 22,874), was significantly  
180 associated ( $p = 8.16 \times 10^{-7}$ ) with *IKZF5* after Bonferroni correction for the number of genes



181 tested. The significant genes (Table 1) were independent of the sentinel variants from the  
182 GWAS (Supplementary Table 1), indicating that the gene-based test was identifying additional  
183 signals.

184 Our analysis identified previously implicated genes for the specific ID traits but also  
185 proposes novel genes and mechanisms. ID-associated genes include *NDUFA4* for intestinal  
186 infection, a component of the cytochrome oxidase and regulator of the electron transport chain  
187 (Balsa et al., 2012); *AKIRIN2* for candidiasis, an evolutionarily conserved regulator of  
188 inflammatory genes in mammalian innate immune cells (Tartey et al., 2015; Tartey et al., 2014);  
189 *ZNF577* for viral hepatitis C, a gene previously shown to be significantly hypermethylated in  
190 hepatitis C related hepatocellular carcinoma (Revill et al., 2013); and epithelial cell adhesion  
191 molecule (*EPCAM*) for tuberculosis, a known marker for differentiating malignant tuberculous  
192 pleurisy (Sun et al., 2014), among many others. These examples of ID-associated genes  
193 highlight the enormous range of molecular mechanisms that may contribute to susceptibility and  
194 complication phenotypes.

195  
196 *Replication of gene-level associations with infectious diseases in the UK Biobank and FinnGen*

197 To bolster our genetic findings and show that our results were not driven by biobank-  
198 specific confounding, we performed replication analysis for a subset of ID traits available in the  
199 independent UK Biobank and FinnGen consortia datasets (see Methods). Individual gene-level  
200 replication results are provided in Supplementary Table 3. Notably, the genes associated with  
201 intestinal infection ( $p < 0.05$ , Phencode 008) in BioVU – the ID trait with the largest sample size in  
202 BioVU *and* with a replication dataset in the independent FinnGen biobank – showed a  
203 significantly greater level of enrichment for gene-level associations with the same trait in  
204 FinnGen compared to the remaining set of genes (Figure 3C). Thus, higher significance (i.e.,  
205 lower p-value) was observed in FinnGen for the intestinal infection associated genes identified  
206 in BioVU, which included the top association *NDUFA4* (discovery  $p = 1.83 \times 10^{-9}$ , replication  $p =$

207 0.044). These results illustrate the value of exploiting large-scale biobank resources for genetic  
208 studies of ID traits- despite well-known caveats (Ko and Urban, 2013; Power et al., 2017).

209

210 *Tissue expression profile of infectious disease associated genes suggests tissue-dependent*  
211 *mechanisms*

212 The ID-associated genes tend to be less tissue-specific (i.e., more ubiquitously  
213 expressed) than the remaining genes (Figure S1A, Mann Whitney U test on the  $\tau$  statistic,  $p =$   
214  $7.5 \times 10^{-4}$ ), possibly reflecting the multi-tissue PrediXcan approach we implemented, which  
215 prioritizes genes with multi-tissue support to improve statistical power, but also the genes'  
216 pleiotropic potential. We hypothesized that tissue expression profiling of ID-associated genes  
217 can provide additional insights into disease etiologies and mechanisms. For example, the  
218 intestinal infection associated gene *NDUFA4* is expressed in a broad set of tissues, including  
219 the alimentary canal, but displays relatively low expression in whole blood (Figure S1B). In  
220 addition, *TOR4A*, the most significant association with bacterial pneumonia (Table 1), is most  
221 abundantly expressed in lung, consistent with the tissue of pathology, but also in spleen (Figure  
222 S1C), whose rupture is a lethal complication of the disease (Domingo et al., 1996; Gerstein et  
223 al., 1967). These examples illustrate the diversity of tissue-dependent mechanisms that may  
224 contribute in complex and dynamic ways to interindividual variability in ID susceptibility and  
225 progression. We therefore provide a resource of single-tissue gene-level associations with the  
226 ID traits to facilitate molecular or clinical follow-up studies.

227

228 *Genetic overlap reveals host gene expression programs and common pathways as targets for*  
229 *pathogenicity*

230 We hypothesized that ID-associated genes implicate shared functions and pathways,  
231 which may reflect common targeted host transcriptional programs. Among the 70 gene-level  
232 associations with the 35 clinical ID traits, 40 proteins are post-translationally modified by

233 phosphorylation (Supplementary Table 4), a significant enrichment (Benjamini-Hochberg  
234 adjusted  $p < 0.10$  on DAVID annotations (Huang da et al., 2009)) relative to the rest of the  
235 genome, indicating that phosphoproteomic profiling can shed substantial light on activated host  
236 factors and perturbed signal transduction pathways during infection (Soderholm et al., 2016;  
237 Stahl et al., 2013). In addition, 16 proteins are acetylated, consistent with emerging evidence  
238 supporting this mechanism in the host antiviral response (Murray et al., 2018) (Supplementary  
239 Table 5). These data identify specific molecular mechanisms across ID traits with critical  
240 regulatory roles (e.g., protein modifications) in host response among the ID-associated genes.

241 We tested the hypothesis that distinct infectious agents exploit common pathways to find  
242 a compatible intracellular niche in the host, potentially implicating shared genetic risk factors.  
243 Notably, 64 of the 70 ID-associated genes (Table 1) were nominally associated ( $p < 0.05$ ) with  
244 multiple ID traits (Supplementary Table 6). These genes warrant further functional study as  
245 broadly exploited mechanisms targeted by pathogens or as broadly critical to pathogen-elicited  
246 immune response. Gene Set Enrichment Analysis (GSEA) of these genes implicated a number  
247 of significant ( $FDR < 0.05$ ) gene sets (Figure 4A), including those involved in actin-based  
248 processes and cytoskeletal protein binding, processes previously demonstrated to mediate host  
249 response to pathogen infection (Taylor et al., 2011). Since diverse bacterial and viral pathogens  
250 target host regulators that control the cytoskeleton (which plays a key role in the biology of  
251 infection) or modify actin in order to increase virulence, intracellular motility, or intercellular  
252 spread (Aktories and Barbieri, 2005; Yu et al., 2011; Zahm et al., 2013), these results  
253 reassuringly lend support to the involvement of the genes in infectious pathogenesis.

254 Notably, we identified an enrichment ( $FDR = 9.68 \times 10^{-3}$ ) for a highly conserved motif  
255 ("TCCCRNNRTGC"), within 4 kb of transcription start site (TSS) of multi-ID associated genes  
256 (Figure 4A-B), that does not match any known transcription factor binding site (Xie et al., 2005)  
257 and may be pivotal for host-pathogen interaction for the diversity of infectious agents included in  
258 our study. In addition, we found that several of the multi-ID associated genes (with the

259 sequence motif near the TSS) have been observed in host-pathogen protein complexes (by  
260 both coimmunoprecipitation and affinity chromatography approaches) for the specific pathogens  
261 responsible for the ID traits (Ammari et al., 2016). See Supplementary Data File 2 for complete  
262 list of host-pathogen interactions for these genes/proteins. One example is *CDK5*, a gene  
263 significantly associated with Gram-positive septicemia (Table 1) and nominally associated with  
264 multiple ID traits, including herpes simplex. CDK5 is activated by p35, whose cleaved form p25  
265 results in subcellular relocation of CDK5. The CDK5-p25 complex regulates inflammation  
266 (Na et al., 2015) (whose large-scale disruption is characteristic of septicemia) and induces  
267 cytoskeletal disruption in neurons (Patrick et al., 1999) (where the herpes virus is responsible  
268 for lifelong latent infection). The A and B chains of the CDK5-p25 complex (Figure 4C for  
269 structure diagram (Tarricone et al., 2001)) are required for cytoskeletal protein binding (CDK5),  
270 whereas the D and E chains (p25) are involved in actin regulation and kinase function, all  
271 molecular processes implicated in our pathway analysis. Intriguingly, blocking CDK5 can have a  
272 substantial impact on the outcome of inflammatory diseases including sepsis (Pfänder et al.,  
273 2019), enhancing the anti-inflammatory potential of immunosuppressive treatments, and has  
274 been shown to attenuate herpes virus replication (Man et al., 2019), suggesting that modulation  
275 of this complex is important for viral pathogenesis.

276 CDK5 is also altered by several other viruses, identified using unbiased mass  
277 spectrometry analysis (Davis et al., 2015) (Figure 4D), indicating a broadly exploited mechanism  
278 (across pathogens) that is consistent with the gene's multi-ID genetic associations in our TWAS  
279 data (Figure 4D). The CDK5-interaction proteins include: 1) M2\_134A1 (matrix protein 2,  
280 influenza A virus), a component of the proton-selective ion channel required for viral genome  
281 release during cellular entry and is targeted by the anti-viral drug amantadine (Hay et al., 1985);  
282 2) VE7\_HP16, a component of human papillomavirus (HPV) required for cellular  
283 transformation and trans-activation through disassembly of E2F1 transcription factor from RB1  
284 leading to impaired production of type I interferons (Barnard et al., 2000; Chellappan et al.,

285 1992; Phelps et al., 1988); 3) VE7\_HP31, which has been shown to engage histone  
286 deacetylases 1 and 2 to promote HPV31 genome maintenance (Longworth and Laimins, 2004);  
287 4) VCYCL\_HHV8P (cyclin homolog within the human herpesvirus 8 genome), which has been  
288 shown to control cell cycle through CDK6 and induce apoptosis through Bcl2 (Duro et al., 1999;  
289 Ojala et al., 1999; Ojala et al., 2000); and 5) F5HC81\_HHV8, predicted to act as a viral cyclin  
290 homolog. Overall, these data underscore the evolutionary strategies that pathogens have  
291 evolved to promote infection, including the hijacking of the host transcriptional machinery and  
292 the biochemical alterations of the host proteome.

293

#### 294 *Serology and culture data reveal insights into clinical infection and pathogen colonization*

295 We exploited extensive clinical microbiological laboratory analysis of blood (Figure 5A),  
296 bronchoalveolar lavage, sputum, sinus/nasopharyngeal, and tracheal cultures for bacterial and  
297 fungal pathogen genus identification (Supplemental Figure 2A-F), as well as respiratory viral  
298 genus identification (Supplemental Figure 5G) (see Methods) to evaluate phenotype resolution  
299 and algorithm. For example, we found that *Staphylococcus* infection (Phecode = 041.1)  
300 performed well in classifying *Staphylococcus aureus* infection based on blood culture data. The  
301 area under the Receiver Operating Characteristic (ROC) curve was 0.938 (Figure 5B) with  
302 standard error of 0.008 generated from bootstrapping (see Methods). The area under the curve  
303 (AUC) quantifies the probability that the Phecode classifier ranks a randomly chosen positive  
304 instance of *Staphylococcus aureus* infection in blood higher than a randomly chosen negative  
305 one. In comparison, the first principal component (PC) in our European ancestry samples  
306 showed AUC of 0.514 (Figure 5B) while sex and age performed even more poorly (AUC  $\approx$   
307 0.50). We then tested a logistic model with the Phecode classifier, age, sex, and the first 5 PCs  
308 in the model. The Phecode classifier was significantly associated ( $p < 2.2 \times 10^{-16}$ ) after  
309 conditioning on the remaining covariates. The fitted value from the joint model consisting of the

310 remaining covariates showed AUC of 0.568 (Figure 5B). Collectively, culture data for improved  
311 resolution of clinical infection and pathogen colonization provide validation of our approach.

312

313 *Phenome scan of clinical ID-associated genes identifies adverse outcomes and complications*

314 Electronic Health Records (EHR) linked to genetic data may reveal insights into  
315 associated clinical sequelae (Bastarache et al., 2018; Denny et al., 2013; Unlu et al., 2020). To  
316 assess the phenomic impact of ID-associated genes (Table 1), we performed a phenome-scale  
317 scan across 197 hematologic, respiratory, cardiovascular, and neurologic traits available in  
318 BioVU (Figure 6A and Supplementary Data File 3). Correcting for total number of genes and  
319 phenotypes tested, we identified four gene-phenotype pairs reaching experiment-wide  
320 significance: 1) *WFDC12*, our most significant ( $p = 4.23 \times 10^{-6}$ ) association with meningitis and a  
321 known anti-bacterial gene (Hagiwara et al., 2003), is also associated with cerebral edema and  
322 compression of brain ( $p = 1.35 \times 10^{-6}$ ), a feared clinical complication of meningitis (Niemöller and  
323 Täuber, 1989); 2) *TM7SF3*, the most significant gene with Gram-negative sepsis ( $p = 1.37 \times 10^{-6}$ ),  
324 is also associated with acidosis ( $p = 1.95 \times 10^{-6}$ ), a known metabolic derangement associated  
325 with severe sepsis (Suetrong and Walley, 2016), and a gene known to play a role in cell stress  
326 and the unfolded protein response (Isaac et al., 2017); 3) *TXLNB*, the most significant gene  
327 associated with viral warts and human papillomavirus infection ( $p = 4.35 \times 10^{-6}$ ), is also  
328 associated with abnormal involuntary movements,  $p = 1.39 \times 10^{-6}$ ; and 4) *RAD18*, the most  
329 significant gene associated with Streptococcus infection ( $p = 2.01 \times 10^{-6}$ ), is also associated with  
330 anemia in neoplastic disease ( $p = 3.10 \times 10^{-6}$ ). Thus, coupling genetic analysis to EHR data with  
331 their characteristic breadth of clinical traits offers the possibility of determining the phenotypic  
332 consequences of ID-associated genes, including known (in the case of *WFDC12* and *TM7SF3*)  
333 potentially adverse health outcomes and complications.

334

335 *Mendelian Randomization provides causal support for the effect of infectious disease trait on*  
336 *identified adverse phenotypic outcomes/complications*

337         Since our gene-level associations with clinical ID diagnoses implicated known adverse  
338 complications, we sought to explicitly evaluate the causal relation between the ID traits and the  
339 adverse outcomes/complications. We utilized the Mendelian Randomization paradigm (Lawlor  
340 et al., 2008) (Figure 6B), which exploits genetic instruments to make causal inferences in  
341 observational data, in effect, performing randomized controlled trials to evaluate the causal  
342 effect of “exposure” (i.e., ID trait) on “outcome” (e.g., the complication). Specifically, we  
343 conducted multiple-instrumental-variable causal inference using GWAS (Davey Smith and  
344 Hemani, 2014) and PrediXcan summary results. First, we used independent SNPs ( $r^2 = 0.01$ )  
345 that pass a certain threshold for significance with the ID trait ( $p < 1.0 \times 10^{-5}$ ) as genetic  
346 instruments. To control for horizontal pleiotropy and account for the presence of invalid genetic  
347 instruments, we utilized MR-Egger regression and weighted-median MR (see Methods)  
348 (Bowden et al., 2015; Bowden et al., 2016).

349         Here, we performed Mendelian Randomization on the ID trait and a complication trait  
350 identified through the unbiased phenome scan. This analysis yields causal support for the effect  
351 of 1) Gram-negative sepsis on acidosis (Figure 6C, weighted-median estimator  $p = 2.0 \times 10^{-7}$ );  
352 and 2) meningitis on cerebral edema and compression of brain (Figure 5C, weighted-median  
353 estimator  $p = 2.7 \times 10^{-3}$ ). Our resource establishes a framework to elucidate the genetic  
354 component of an ID trait and its impact on the human disease phenome, enabling causal  
355 inference on the effect of an ID trait on potential complications.

356

357

358 *TWAS of 79 pathogen-exposure induced cellular traits highlights cellular mechanisms and*  
359 *enables validation of ID gene-level associations*

360 Elucidating how the genes influence infection-related cellular trait variation may provide  
361 a mechanistic link to ID susceptibility. We thus performed TWAS of 79 pathogen-induced  
362 cellular traits – including infectivity and replication, cytokine levels, and host cell death, among  
363 others (Wang et al., 2018) (Supplementary Data File 4). Across all cellular traits, we identified  
364 38 gene-level associations reaching trait-level significance ( $p < 2.87 \times 10^{-6}$ , correcting for number  
365 of statistical tests; Figure 7A). In addition, we identified significantly more replicated SNP  
366 associations than expected by chance (binomial test,  $p < 0.05$ ) across all ID traits  
367 (Supplementary Data File 4) and ID traits which map directly to cellular phenotypes  
368 (Supplementary Data File 5).

369 Integration of EHR data into Hi-HOST (Wang et al., 2018) may enable replication of  
370 gene-level associations with a clinical ID trait. Indeed, we observed a marked enrichment for  
371 genes associated with direct *Staphylococcus* toxin exposure cellular response in Hi-HOST  
372 among the human Gram-positive septicemia associated genes from BioVU (see Supplementary  
373 Data File 4 for genes with FDR  $< 0.05$ ) (Figure 7B). In addition, integration of EHR data into Hi-  
374 HOST may improve the signal-to-noise ratio in Hi-HOST TWAS data. Indeed, the top 300 genes  
375 nominally associated ( $p < 0.016$ ) with *Staphylococcus* infection (Phecode 041.1) in BioVU  
376 departed from null expectation for their associations with *Staphylococcus* toxin exposure in Hi-  
377 HOST compared to the full set of genes, which did not (Figure 7C), as perhaps expected due to  
378 the modest sample size. Collectively, these results demonstrate that integrating the EHR-  
379 derived TWAS results into TWAS of the cellular trait can greatly improve identification of  
380 potentially relevant pathogenic mechanisms.

381

### 382 *Phenome scan of TWAS findings from Hi-HOST*

383 To identify potential adverse effects of direct pathogen exposure, we performed a  
384 phenome-scan across the 197 cardiovascular, hematologic, neurologic, and respiratory traits as  
385 described above. Our top gene-phenotype pairs include: 1) *FAM171B*, our most significant



386 association with interleukin 13 (IL-13) levels is also associated with alveolar and parietoalveolar  
387 pneumonopathy ( $p = 4.04 \times 10^{-5}$ ), a phenotype known to be modulated by IL-13 dependent  
388 signaling (Zheng et al., 2008); 2) *OSBPL10*, the most significant gene associated with cell death  
389 caused by *Salmonella enterica serovar Typhimurium*, is also associated with intracerebral  
390 hemorrhage ( $p = 4.99 \times 10^{-5}$ ), a known complication of *S. Typhimurium* endocarditis (Gómez-  
391 Moreno et al., 2000). These data highlight the utility of joint genetic analysis of pathogen-  
392 exposure-induced phenotypes and clinical ID traits to gain insights into the molecular and  
393 cellular basis of complications and adverse outcomes. However, more definitive conclusions will  
394 require larger sample sizes and functional studies.

395

## 396 **DISCUSSION**

397 ID susceptibility is a complex interplay between host genetic variation and pathogen-  
398 exposure induced mechanisms. While GWAS has begun to identify population-specific loci  
399 conferring ID risk (Tian et al., 2017), the underlying function of identified variants, predominantly  
400 in non-coding regulatory regions, remains poorly understood. Molecular characterization of  
401 infectious processes has been, in general, agnostic to the genetic architecture of clinical  
402 infection. Although pathogen exposure is requisite to display clinical ID traits, the role of host  
403 genetic variation remains largely unexplored.

404 Our study provides a reference atlas of genetic variants and genetically-determined  
405 expression traits associated with 35 clinical ID traits from BioVU. We identified 70 gene-level  
406 associations, with replication for a subset of ID traits in the UK Biobank and FinnGen. A  
407 phenome scan across 197 hematologic, respiratory, cardiovascular, and neurologic traits  
408 proposes a molecular basis for the link between certain ID traits and outcomes. Using  
409 Mendelian Randomization, we determined the ID traits which, as exposure, show significant  
410 causal effect on outcomes. Finally, we developed a TWAS catalog of 79 pathogen-exposure

411 induced cellular traits (Hi-HOST) in a broad collection of tissues, which provides a platform to  
412 interrogate mediating cellular and molecular mechanisms.

413 Genetic predisposition to ID onset and progression is likely to be complex (Casanova,  
414 2015a). Monogenic mechanisms conferring ID risk have been proposed, but these mechanisms  
415 are unlikely to explain the broad contribution of host genetic influence on ID risk (Casanova,  
416 2015b). Thus, a function-centric methodology is necessary to disentangle potentially causal  
417 pathways. Our approach builds on PrediXcan, which estimates the genetically-determined  
418 component of gene expression (Gamazon et al., 2015). The genetic component of gene  
419 expression can then be tested for association with the trait, enabling insights into potential  
420 pathogenic mechanisms (Gamazon et al., 2019) and novel therapeutic strategies (So et al.,  
421 2017).

422 Our study identified genes with diverse functions, including roles in mitochondrial  
423 bioenergetics (Balsa et al., 2012; El-Bacha and Da Poian, 2013), regulation of cell death (Labbé  
424 and Saleh, 2008), and of course links to host immune response (Brouwer et al., 2019; Liang et  
425 al., 2019; Pan et al., 2017; Saitoh et al., 2009; Sharfe et al., 1997; Tsuboi and Meerloo, 2007;  
426 Walenna et al., 2018; Willis et al., 2009; Yu et al., 2017; Zhang et al., 2015). These diverse  
427 functions may therefore contribute to pleiotropic effects on clinical outcomes and complications.

428 In addition, we identified genes implicated in Mendelian diseases, for which susceptibility  
429 to infection is a predominant feature, including *WIPF1* (OMIM #614493; recurrent infections and  
430 reduced natural killer cell activity (Lanzi et al., 2012)), *IL2RA* (OMIM #606367; recurrent  
431 bacterial infections, recurrent viral infections, and recurrent fungal infections (Sharfe et al.,  
432 1997)), and *TBK1* (OMIM #617900; herpes simplex encephalitis (HSE), acute infection, and  
433 episodic HSE (Herman et al., 2012)). These examples show that the identified genes may also  
434 confer predisposition, with near-complete penetrance, to an infectious disease related trait  
435 displaying true Mendelian segregation.

436           Enrichment analysis of 64 of the 70 ID-associated genes with nominal support for  
437 associations with other clinical ID traits identified modulation of the actin cytoskeleton as a  
438 potential shared mechanism of host susceptibility to infection (Figure 4). While manipulation of  
439 the actin cytoskeleton by pathogens is hardly a new concept, our study identified specific host  
440 genetic variation in actin regulatory genes that is potentially causative of clinical ID  
441 manifestations. In addition to pathogen interaction with the cytoskeletal transport machinery,  
442 efficient exploitation of host gene expression program is crucial for successful invasion and  
443 colonization, and here we mapped several pathogenicity-relevant targets. Notably, we observed  
444 a significant enrichment for a highly conserved sequence motif, within 4 kb of a multi-ID-  
445 associated gene's TSS, that is not a known transcription factor binding site. The motif's  
446 presence near multi-ID associated genes suggests a broad regulatory role in host-pathogen  
447 interaction, involving the diversity of pathogens examined here, towards successful  
448 reprogramming of host gene expression. Furthermore, we identified a significant enrichment for  
449 phosphorylated host proteins, suggesting the value of global phosphoproteomic profiling, which  
450 has recently been used to prioritize pharmacological targets for the novel SARS-CoV-2 virus  
451 (Bouhaddou et al., 2020). These data provide several potential avenues by which host  
452 susceptibility can be breached by a pathogen's requirement to maintain a niche through  
453 manipulation of host cellular machinery.

454           To obtain additional support for our gene-level associations, we leveraged two genomic  
455 resources with rich phenotypic information (UK Biobank (Bycroft et al., 2018) and FinnGen  
456 (Locke et al., 2019)). These data will prove increasingly useful to characterizing the genetic  
457 basis of the ID-associated adverse outcomes and complications. Despite the caveats for the  
458 use of EHR in genetic analyses of ID traits (Ko and Urban, 2013; Power et al., 2017), the  
459 growing availability of such independent datasets will facilitate identification of robust genetic  
460 associations. Perhaps more importantly, the breadth of clinical phenotypes in these EHR

461 datasets should enable identification of associated adverse outcomes and complications for the  
462 ID-associated genes.

463         The primary challenges in conducting GWAS of ID traits include phenotype definition  
464 and case-control misclassification. Obstacles to accurate phenotype definition include the  
465 requirement of specialized laboratory testing to identify specific pathogens and administration of  
466 prophylactic therapeutics complicating identification of potentially causative pathogens.  
467 Seropositivity may result from the complex genetic properties of the pathogen and the particular  
468 mechanisms governing host-pathogen interaction. However, seropositivity may not indicate  
469 clinical manifestations of the disease. On the other hand, seronegativity may imply lack of  
470 exposure to the pathogen, the absence of infection even in the presence of exposure, or host  
471 resistance to infection. Anchoring the analysis to host genetic information (as in our use of  
472 genetically-determined expression) and replication of discovered associations may address  
473 some aspects of this challenge. Here we exploit an extensive resource of culture data (for  
474 identification of pathogens from clinical specimens) linked to whole-genome genetic information  
475 to provide additional support to our gene-level associations. Future studies may implement  
476 more complex GWAS models, including incorporating the pathogen genome.

477         Mendelian Randomization provides a framework to perform causal inference on the  
478 effect of the exposure on the outcome (Davey Smith and Hemani, 2014; Lawlor et al., 2008).  
479 We leveraged a summary statistics based approach to test the causal effect of an ID trait on  
480 potential adverse outcomes, using genetic instruments. Mendelian Randomization requires  
481 three assumptions: 1) the genetic instrument is associated with exposure (i.e., ID trait); 2) the  
482 genetic instrument is associated with the outcome (i.e., adverse outcome or complication) only  
483 through the exposure of interest; and 3) the genetic instrument is affecting the outcome  
484 independent of other factors (i.e., confounders). Violations of these assumptions can have  
485 critical implications for the interpretation of the results. Thus, several approaches have been  
486 developed that are robust to these violations. In the case of ID traits, a methodology that

487 distinguishes causality from comorbidity is critical. While many phenotypes are highly comorbid  
488 and suspected to have a causal relationship (e.g., smoking and depression/anxiety), Mendelian  
489 Randomization does not necessarily support the causal hypothesis (Taylor et al., 2014).  
490 Furthermore, since RCTs cannot be ethically conducted for ID traits and adverse outcomes, the  
491 methodology offers an approach for elucidating the role of an infection phenotype or pathogen  
492 exposure in disease causation using an observational study design. Here, we found strong  
493 causal support for the effect of certain clinical ID traits on potential adverse complications  
494 identified through a phenome scan of the ID-associated genes: 1) meningitis - cerebral edema  
495 and compression of brain; and 2) Gram-negative sepsis - acidosis. These data indicate that  
496 genetic risk factors for select adverse outcomes and complications exert their phenotypic effect  
497 through the relevant ID traits.

498         To enable investigations into mediating cellular and molecular traits for the ID-associated  
499 genes, we provide a functional genomics resource built on a high-throughput *in vitro* pathogen  
500 infection screen (Hi-HOST) (Wang et al., 2018). Integration of EHR data into Hi-HOST facilitates  
501 replication of gene-level associations with clinical ID traits and greatly improves the signal-to-  
502 noise ratio. This discovery and replication platform, encompassing human phenomics and  
503 cellular microbiology, provides a high-throughput approach to linking host cellular processes to  
504 clinical ID traits and adverse outcomes.

505         Although additional mechanistic studies are warranted, our study lays the foundation for  
506 anchoring targeted molecular studies in human genetic variation. Elucidation of host  
507 mechanisms exploited by pathogens requires multi-disciplinary approaches. Here, we show the  
508 broader role of host genetic variation, implicating diverse disease mechanisms. Our study  
509 generates a rich resource and a genetics-anchored methodology to facilitate investigations of  
510 ID-associated clinical outcomes and complications, with important implications for the  
511 development of preventive strategies and more effective therapeutics. Causal inference on the  
512 clinical ID traits and potential complications promises to expand our understanding of the

513 molecular basis for the link and, crucially, enable prediction and prevention of serious adverse

514 events.

515

516  
517  
518  
519  
520  
521  
522  
523  
524  
525  
526  
527  
528  
529  
530  
531  
532  
533  
534  
535  
536  
537  
538  
539  
540  
541  
542  
543  
544  
545  
546  
547  
548  
549  
550  
551  
552  
553

## REFERENCES

- (2015). Human genomics. The Genotype-Tissue Expression (GTEx) pilot analysis: multitissue gene regulation in humans. *Science (New York, NY)* *348*, 648-660.
- Aktorjies, K., and Barbieri, J.T. (2005). Bacterial cytotoxins: targeting eukaryotic switches. *Nat Rev Microbiol* *3*, 397-410.
- Ammari, M.G., Gresham, C.R., McCarthy, F.M., and Nanduri, B. (2016). HPIDB 2.0: a curated database for host-pathogen interactions. *Database : the journal of biological databases and curation* *2016*.
- Auton, A., Brooks, L.D., Durbin, R.M., Garrison, E.P., Kang, H.M., Korbel, J.O., Marchini, J.L., McCarthy, S., McVean, G.A., and Abecasis, G.R. (2015). A global reference for human genetic variation. *Nature* *526*, 68-74.
- Balsa, E., Marco, R., Perales-Clemente, E., Szklarczyk, R., Calvo, E., Landázuri, M.O., and Enríquez, J.A. (2012). NDUFA4 is a subunit of complex IV of the mammalian electron transport chain. *Cell Metab* *16*, 378-386.
- Barbeira, A.N., Dickinson, S.P., Bonazzola, R., Zheng, J., Wheeler, H.E., Torres, J.M., Torstenson, E.S., Shah, K.P., Garcia, T., Edwards, T.L., *et al.* (2018). Exploring the phenotypic consequences of tissue specific gene expression variation inferred from GWAS summary statistics. *Nat Commun* *9*, 1825.
- Barbeira, A.N., Pividori, M., Zheng, J., Wheeler, H.E., Nicolae, D.L., and Im, H.K. (2019). Integrating predicted transcriptome from multiple tissues improves association detection. *PLoS Genet* *15*, e1007889.
- Barnard, P., Payne, E., and McMillan, N.A. (2000). The human papillomavirus E7 protein is able to inhibit the antiviral and anti-growth functions of interferon-alpha. *Virology* *277*, 411-419.
- Bastarache, L., Hughey, J.J., Hebring, S., Marlo, J., Zhao, W., Ho, W.T., Van Driest, S.L., McGregor, T.L., Mosley, J.D., Wells, Q.S., *et al.* (2018). Phenotype risk scores identify patients with unrecognized Mendelian disease patterns. *Science (New York, NY)* *359*, 1233-1239.
- Battle, A., Brown, C.D., Engelhardt, B.E., and Montgomery, S.B. (2017). Genetic effects on gene expression across human tissues. *Nature* *550*, 204-213.
- Bouhaddou, M., Memon, D., Meyer, B., White, K.M., Rezelj, V.V., Marrero, M.C., Polacco, B.J., Melnyk, J.E., Ulferts, S., Kaake, R.M., *et al.* (2020). The Global Phosphorylation Landscape of SARS-CoV-2 Infection. *Cell*.
- Bowden, J., Davey Smith, G., and Burgess, S. (2015). Mendelian randomization with invalid instruments: effect estimation and bias detection through Egger regression. *Int J Epidemiol* *44*, 512-525.
- Bowden, J., Davey Smith, G., Haycock, P.C., and Burgess, S. (2016). Consistent Estimation in Mendelian Randomization with Some Invalid Instruments Using a Weighted Median Estimator. *Genetic epidemiology* *40*, 304-314.

- 554 Brouwer, W.P., Chan, H.L., Lampertico, P., Hou, J., Tangkijvanich, P., Reesink, H.W., Zhang,  
555 W., Mangia, A., Tanwandee, T., Montalto, G., *et al.* (2019). Genome Wide Association Study  
556 Identifies Genetic Variants Associated With Early And Sustained Response To (Peg)Interferon  
557 In Chronic Hepatitis B Patients: The GIANT-B Study. *Clinical infectious diseases : an official*  
558 *publication of the Infectious Diseases Society of America.*
- 559 Bulik-Sullivan, B., Finucane, H.K., Anttila, V., Gusev, A., Day, F.R., Loh, P.R., Duncan, L.,  
560 Perry, J.R., Patterson, N., Robinson, E.B., *et al.* (2015). An atlas of genetic correlations across  
561 human diseases and traits. *Nat Genet* 47, 1236-1241.
- 562 Burgner, D., Jamieson, S.E., and Blackwell, J.M. (2006). Genetic susceptibility to infectious  
563 diseases: big is beautiful, but will bigger be even better? *Lancet Infect Dis* 6, 653-663.
- 564 Bycroft, C., Freeman, C., Petkova, D., Band, G., Elliott, L.T., Sharp, K., Motyer, A., Vukcevic, D.,  
565 Delaneau, O., O'Connell, J., *et al.* (2018). The UK Biobank resource with deep phenotyping and  
566 genomic data. *Nature* 562, 203-209.
- 567 Casanova, J.L. (2015a). Human genetic basis of interindividual variability in the course of  
568 infection. *Proc Natl Acad Sci U S A* 112, E7118-7127.
- 569 Casanova, J.L. (2015b). Severe infectious diseases of childhood as monogenic inborn errors of  
570 immunity. *Proc Natl Acad Sci U S A* 112, E7128-7137.
- 571 Chellappan, S., Kraus, V.B., Kroger, B., Munger, K., Howley, P.M., Phelps, W.C., and Nevins,  
572 J.R. (1992). Adenovirus E1A, simian virus 40 tumor antigen, and human papillomavirus E7  
573 protein share the capacity to disrupt the interaction between transcription factor E2F and the  
574 retinoblastoma gene product. *Proc Natl Acad Sci U S A* 89, 4549-4553.
- 575 Consortium, G. (2013). The Genotype-Tissue Expression (GTEx) project. *Nat Genet* 45, 580-  
576 585.
- 577 Cotsapas, C., Voight, B.F., Rossin, E., Lage, K., Neale, B.M., Wallace, C., Abecasis, G.R.,  
578 Barrett, J.C., Behrens, T., Cho, J., *et al.* (2011). Pervasive sharing of genetic effects in  
579 autoimmune disease. *PLoS Genet* 7, e1002254.
- 580 Datsenko, K.A., and Wanner, B.L. (2000). One-step inactivation of chromosomal genes in  
581 *Escherichia coli* K-12 using PCR products. *Proc Natl Acad Sci U S A* 97, 6640-6645.
- 582 Davey Smith, G., and Hemani, G. (2014). Mendelian randomization: genetic anchors for causal  
583 inference in epidemiological studies. *Human molecular genetics* 23, R89-98.
- 584 Davis, Z.H., Verschueren, E., Jang, G.M., Kleffman, K., Johnson, J.R., Park, J., Von Dollen, J.,  
585 Maher, M.C., Johnson, T., Newton, W., *et al.* (2015). Global mapping of herpesvirus-host  
586 protein complexes reveals a transcription strategy for late genes. *Molecular cell* 57, 349-360.
- 587 de Bakker, P.I., and Telenti, A. (2010). Infectious diseases not immune to genome-wide  
588 association. *Nat Genet* 42, 731-732.
- 589 Denny, J.C., Bastarache, L., Ritchie, M.D., Carroll, R.J., Zink, R., Mosley, J.D., Field, J.R.,  
590 Pulley, J.M., Ramirez, A.H., Bowton, E., *et al.* (2013). Systematic comparison of phenome-wide



- 591 association study of electronic medical record data and genome-wide association study data.  
592 *Nature biotechnology* 31, 1102-1110.
- 593 Denny, J.C., Ritchie, M.D., Basford, M.A., Pulley, J.M., Bastarache, L., Brown-Gentry, K., Wang,  
594 D., Masys, D.R., Roden, D.M., and Crawford, D.C. (2010). PheWAS: demonstrating the  
595 feasibility of a phenome-wide scan to discover gene-disease associations. *Bioinformatics* 26,  
596 1205-1210.
- 597 Derks, E.M., Zwinderman, A.H., and Gamazon, E.R. (2017). The Relation Between Inflation in  
598 Type-I and Type-II Error Rate and Population Divergence in Genome-Wide Association Analysis  
599 of Multi-Ethnic Populations. *Behavior genetics* 47, 360-368.
- 600 Domingo, P., Rodriguez, P., Lopez-Contreras, J., Rebasa, P., Mota, S., and Matias-Guiu, X.  
601 (1996). Spontaneous rupture of the spleen associated with pneumonia. *European journal of*  
602 *clinical microbiology & infectious diseases : official publication of the European Society of*  
603 *Clinical Microbiology* 15, 733-736.
- 604 Duro, D., Schulze, A., Vogt, B., Bartek, J., Mitnacht, S., and Jansen, D.r.P. (1999). Activation of  
605 cyclin A gene expression by the cyclin encoded by human herpesvirus-8. *J Gen Virol* 80 ( Pt 3),  
606 549-555.
- 607 Efron, B. (1979). Bootstrap Methods: Another Look at the Jackknife. *Ann Statist* 7, 1-26.
- 608 El-Bacha, T., and Da Poian, A.T. (2013). Virus-induced changes in mitochondrial bioenergetics  
609 as potential targets for therapy. *The international journal of biochemistry & cell biology* 45, 41-  
610 46.
- 611 Gamazon, E.R., Segre, A.V., van de Bunt, M., Wen, X., Xi, H.S., Hormozdiari, F., Ongen, H.,  
612 Konkashbaev, A., Derks, E.M., Aguet, F., *et al.* (2018). Using an atlas of gene regulation across  
613 44 human tissues to inform complex disease- and trait-associated variation. *Nat Genet* 50, 956-  
614 967.
- 615 Gamazon, E.R., Wheeler, H.E., Shah, K.P., Mozaffari, S.V., Aquino-Michaels, K., Carroll, R.J.,  
616 Eyer, A.E., Denny, J.C., Nicolae, D.L., Cox, N.J., *et al.* (2015). A gene-based association  
617 method for mapping traits using reference transcriptome data. *Nat Genet* 47, 1091-1098.
- 618 Gamazon, E.R., Zwinderman, A.H., Cox, N.J., Denys, D., and Derks, E.M. (2019). Multi-tissue  
619 transcriptome analyses identify genetic mechanisms underlying neuropsychiatric traits. *Nat*  
620 *Genet* 51, 933-940.
- 621 García-Montero, M., Rodríguez-García, J.L., Calvo, P., González, J.M., Fernández-Garrido, M.,  
622 Loza, E., and Serrano, M. (1995). Pneumonia caused by *Listeria monocytogenes*. *Respiration*  
623 62, 107-109.
- 624 Gerstein, A.R., Riegel, N., and Dennis, M. (1967). Ruptured Spleen Simulating Pneumonia.  
625 *JAMA* 199, 589-589.
- 626 Gómez-Moreno, J., Moar, C., Román, F., Pérez-Maestu, R., and López de Letona, J.M. (2000).  
627 *Salmonella* endocarditis presenting as cerebral hemorrhage. *Eur J Intern Med* 11, 96-97.

- 628 Gusev, A., Ko, A., Shi, H., Bhatia, G., Chung, W., Penninx, B.W.J.H., Jansen, R., de Geus,  
629 E.J.C., Boomsma, D.I., Wright, F.A., *et al.* (2016). Integrative approaches for large-scale  
630 transcriptome-wide association studies. *Nature genetics* 48, 245-252.
- 631 Hagiwara, K., Kikuchi, T., Endo, Y., Huqun, Usui, K., Takahashi, M., Shibata, N., Kusakabe, T.,  
632 Xin, H., Hoshi, S., *et al.* (2003). Mouse SWAM1 and SWAM2 are antibacterial proteins  
633 composed of a single whey acidic protein motif. *J Immunol* 170, 1973-1979.
- 634 Hay, A.J., Wolstenholme, A.J., Skehel, J.J., and Smith, M.H. (1985). The molecular basis of the  
635 specific anti-influenza action of amantadine. *Embo j* 4, 3021-3024.
- 636 Herman, M., Ciancanelli, M., Ou, Y.H., Lorenzo, L., Klaudel-Dreszler, M., Pauwels, E., Sancho-  
637 Shimizu, V., Pérez de Diego, R., Abhyankar, A., Israelsson, E., *et al.* (2012). Heterozygous  
638 TBK1 mutations impair TLR3 immunity and underlie herpes simplex encephalitis of childhood.  
639 *The Journal of experimental medicine* 209, 1567-1582.
- 640 Herndon, C.N., and Jennings, R.G. (1951). A twin-family study of susceptibility to poliomyelitis.  
641 *Am J Hum Genet* 3, 17-46.
- 642 Hohler, T., Reuss, E., Evers, N., Dietrich, E., Rittner, C., Freitag, C.M., Vollmar, J., Schneider,  
643 P.M., and Fimmers, R. (2002). Differential genetic determination of immune responsiveness to  
644 hepatitis B surface antigen and to hepatitis A virus: a vaccination study in twins. *Lancet* 360,  
645 991-995.
- 646 Huang da, W., Sherman, B.T., and Lempicki, R.A. (2009). Systematic and integrative analysis of  
647 large gene lists using DAVID bioinformatics resources. *Nat Protoc* 4, 44-57.
- 648 Isaac, R., Goldstein, I., Furth, N., Zilber, N., Streim, S., Boura-Halfon, S., Elhanany, E., Rotter,  
649 V., Oren, M., and Zick, Y. (2017). TM7SF3, a novel p53-regulated homeostatic factor,  
650 attenuates cellular stress and the subsequent induction of the unfolded protein response. *Cell*  
651 *Death Differ* 24, 132-143.
- 652 Jordan, D.M., Verbanck, M., and Do, R. (2019). HOPS: a quantitative score reveals pervasive  
653 horizontal pleiotropy in human genetic variation is driven by extreme polygenicity of human traits  
654 and diseases. *Genome Biol* 20, 222.
- 655 Ko, D.C., Gamazon, E.R., Shukla, K.P., Pfuetzner, R.A., Whittington, D., Holden, T.D.,  
656 Brittnacher, M.J., Fong, C., Radey, M., Ogohara, C., *et al.* (2012). Functional genetic screen of  
657 human diversity reveals that a methionine salvage enzyme regulates inflammatory cell death.  
658 *Proc Natl Acad Sci U S A* 109, E2343-2352.
- 659 Ko, D.C., Shukla, K.P., Fong, C., Wasnick, M., Brittnacher, M.J., Wurfel, M.M., Holden, T.D.,  
660 O'Keefe, G.E., Van Yserloo, B., Akey, J.M., *et al.* (2009). A genome-wide in vitro bacterial-  
661 infection screen reveals human variation in the host response associated with inflammatory  
662 disease. *Am J Hum Genet* 85, 214-227.
- 663 Ko, D.C., and Urban, T.J. (2013). Understanding human variation in infectious disease  
664 susceptibility through clinical and cellular GWAS. *PLoS Pathog* 9, e1003424.
- 665 Labbé, K., and Saleh, M. (2008). Cell death in the host response to infection. *Cell Death Differ*  
666 15, 1339-1349.

- 667 Lanzi, G., Moratto, D., Vairo, D., Masneri, S., Delmonte, O., Paganini, T., Parolini, S., Tabellini,  
668 G., Mazza, C., Savoldi, G., *et al.* (2012). A novel primary human immunodeficiency due to  
669 deficiency in the WASP-interacting protein WIP. *The Journal of experimental medicine* 209, 29-  
670 34.
- 671 Lawlor, D.A., Harbord, R.M., Sterne, J.A., Timpson, N., and Davey Smith, G. (2008). Mendelian  
672 randomization: using genes as instruments for making causal inferences in epidemiology. *Stat*  
673 *Med* 27, 1133-1163.
- 674 Liang, X., Gupta, K., Quintero, J.R., Cernadas, M., Kobzik, L., Christou, H., Pier, G.B., Owen,  
675 C.A., and Cataltepe, S. (2019). Macrophage FABP4 is required for neutrophil recruitment and  
676 bacterial clearance in *Pseudomonas aeruginosa* pneumonia. *Faseb j* 33, 3562-3574.
- 677 Locke, A.E., Steinberg, K.M., Chiang, C.W.K., Service, S.K., Havulinna, A.S., Stell, L., Pirinen,  
678 M., Abel, H.J., Chiang, C.C., Fulton, R.S., *et al.* (2019). Exome sequencing of Finnish isolates  
679 enhances rare-variant association power. *Nature* 572, 323-328.
- 680 Longworth, M.S., and Laimins, L.A. (2004). The binding of histone deacetylases and the  
681 integrity of zinc finger-like motifs of the E7 protein are essential for the life cycle of human  
682 papillomavirus type 31. *J Virol* 78, 3533-3541.
- 683 Lyczak, J.B., Cannon, C.L., and Pier, G.B. (2002). Lung infections associated with cystic  
684 fibrosis. *Clin Microbiol Rev* 15, 194-222.
- 685 Malaty, H.M., Engstrand, L., Pedersen, N.L., and Graham, D.Y. (1994). *Helicobacter pylori*  
686 infection: genetic and environmental influences. A study of twins. *Annals of internal medicine*  
687 120, 982-986.
- 688 Man, A., Slevin, M., Petcu, E., and Fraefel, C. (2019). The Cyclin-Dependent Kinase 5 Inhibitor  
689 Peptide Inhibits Herpes Simplex Virus Type 1 Replication. *Scientific reports* 9, 1260.
- 690 Murray, L.A., Sheng, X., and Cristea, I.M. (2018). Orchestration of protein acetylation as a  
691 toggle for cellular defense and virus replication. *Nat Commun* 9, 4967.
- 692 Na, Y.R., Jung, D., Gu, G.J., Jang, A.R., Suh, Y.-H., and Seok, S.H. (2015). The early synthesis  
693 of p35 and activation of CDK5 in LPS-stimulated macrophages suppresses interleukin-10  
694 production. *Science signaling* 8, ra121-ra121.
- 695 Niemöller, U.M., and Täuber, M.G. (1989). Brain edema and increased intracranial pressure in  
696 the pathophysiology of bacterial meningitis. *European journal of clinical microbiology &*  
697 *infectious diseases* : official publication of the European Society of Clinical Microbiology 8, 109-  
698 117.
- 699 Odds, F.C., Brown, A.J., and Gow, N.A. (2004). *Candida albicans* genome sequence: a platform  
700 for genomics in the absence of genetics. *Genome Biol* 5, 230.
- 701 Ojala, P.M., Tiainen, M., Salven, P., Veikkola, T., Castaños-Vélez, E., Sarid, R., Biberfeld, P.,  
702 and Mäkelä, T.P. (1999). Kaposi's sarcoma-associated herpesvirus-encoded v-cyclin triggers  
703 apoptosis in cells with high levels of cyclin-dependent kinase 6. *Cancer Res* 59, 4984-4989.

- 704 Ojala, P.M., Yamamoto, K., Castaños-Vélez, E., Biberfeld, P., Korsmeyer, S.J., and Mäkelä,  
705 T.P. (2000). The apoptotic v-cyclin-CDK6 complex phosphorylates and inactivates Bcl-2. *Nature*  
706 *cell biology* 2, 819-825.
- 707 Pan, Y., Tian, T., Park, C.O., Lofftus, S.Y., Mei, S., Liu, X., Luo, C., O'Malley, J.T., Gehad, A.,  
708 Teague, J.E., *et al.* (2017). Survival of tissue-resident memory T cells requires exogenous lipid  
709 uptake and metabolism. *Nature* 543, 252-256.
- 710 Patrick, G.N., Zukerberg, L., Nikolic, M., de la Monte, S., Dikkes, P., and Tsai, L.H. (1999).  
711 Conversion of p35 to p25 deregulates Cdk5 activity and promotes neurodegeneration. *Nature*  
712 402, 615-622.
- 713 Pfänder, P., Fidan, M., Burret, U., Lipinski, L., and Vettorazzi, S. (2019). Cdk5 Deletion  
714 Enhances the Anti-inflammatory Potential of GC-Mediated GR Activation During Inflammation.  
715 *Frontiers in Immunology* 10.
- 716 Phelps, W.C., Yee, C.L., Münger, K., and Howley, P.M. (1988). The human papillomavirus type  
717 16 E7 gene encodes transactivation and transformation functions similar to those of adenovirus  
718 E1A. *Cell* 53, 539-547.
- 719 Power, R.A., Parkhill, J., and de Oliveira, T. (2017). Microbial genome-wide association studies:  
720 lessons from human GWAS. *Nature Reviews Genetics* 18, 41-50.
- 721 Price, A.L., Patterson, N.J., Plenge, R.M., Weinblatt, M.E., Shadick, N.A., and Reich, D. (2006).  
722 Principal components analysis corrects for stratification in genome-wide association studies. *Nat*  
723 *Genet* 38, 904-909.
- 724 Pujol, C., and Bliska, J.B. (2003). The ability to replicate in macrophages is conserved between  
725 *Yersinia pestis* and *Yersinia pseudotuberculosis*. *Infect Immun* 71, 5892-5899.
- 726 Revill, K., Wang, T., Lachenmayer, A., Kojima, K., Harrington, A., Li, J., Hoshida, Y., Llovet,  
727 J.M., and Powers, S. (2013). Genome-wide methylation analysis and epigenetic unmasking  
728 identify tumor suppressor genes in hepatocellular carcinoma. *Gastroenterology* 145, 1424-  
729 1435.e1421-1425.
- 730 Roden, D.M., Pulley, J.M., Basford, M.A., Bernard, G.R., Clayton, E.W., Balsler, J.R., and  
731 Masys, D.R. (2008). Development of a large-scale de-identified DNA biobank to enable  
732 personalized medicine. *Clinical pharmacology and therapeutics* 84, 362-369.
- 733 Saitoh, T., Fujita, N., Hayashi, T., Takahara, K., Satoh, T., Lee, H., Matsunaga, K., Kageyama,  
734 S., Omori, H., Noda, T., *et al.* (2009). Atg9a controls dsDNA-driven dynamic translocation of  
735 STING and the innate immune response. *Proc Natl Acad Sci U S A* 106, 20842-20846.
- 736 Saka, H.A., Thompson, J.W., Chen, Y.S., Kumar, Y., Dubois, L.G., Moseley, M.A., and Valdivia,  
737 R.H. (2011). Quantitative proteomics reveals metabolic and pathogenic properties of *Chlamydia*  
738 *trachomatis* developmental forms. *Molecular microbiology* 82, 1185-1203.
- 739 Sharfe, N., Dadi, H.K., Shahar, M., and Roifman, C.M. (1997). Human immune disorder arising  
740 from mutation of the alpha chain of the interleukin-2 receptor. *Proc Natl Acad Sci U S A* 94,  
741 3168-3171.

- 742 Shi, H., Kichaev, G., and Pasaniuc, B. (2016). Contrasting the Genetic Architecture of 30  
743 Complex Traits from Summary Association Data. *Am J Hum Genet* 99, 139-153.
- 744 So, H.C., Chau, C.K., Chiu, W.T., Ho, K.S., Lo, C.P., Yim, S.H., and Sham, P.C. (2017).  
745 Analysis of genome-wide association data highlights candidates for drug repositioning in  
746 psychiatry. *Nat Neurosci* 20, 1342-1349.
- 747 Soderholm, S., Kainov, D.E., Ohman, T., Denisova, O.V., Schepens, B., Kuleskiy, E., Imanishi,  
748 S.Y., Corthals, G., Hintsanen, P., Aittokallio, T., *et al.* (2016). Phosphoproteomics to  
749 Characterize Host Response During Influenza A Virus Infection of Human Macrophages.  
750 *Molecular & cellular proteomics : MCP* 15, 3203-3219.
- 751 Stahl, J.A., Chavan, S.S., Sifford, J.M., MacLeod, V., Voth, D.E., Edmondson, R.D., and  
752 Forrest, J.C. (2013). Phosphoproteomic analyses reveal signaling pathways that facilitate lytic  
753 gammaherpesvirus replication. *PLoS Pathog* 9, e1003583.
- 754 Subramanian, A., Tamayo, P., Mootha, V.K., Mukherjee, S., Ebert, B.L., Gillette, M.A.,  
755 Paulovich, A., Pomeroy, S.L., Golub, T.R., Lander, E.S., *et al.* (2005). Gene set enrichment  
756 analysis: a knowledge-based approach for interpreting genome-wide expression profiles. *Proc*  
757 *Natl Acad Sci U S A* 102, 15545-15550.
- 758 Suetrong, B., and Walley, K.R. (2016). Lactic Acidosis in Sepsis: It's Not All Anaerobic:  
759 Implications for Diagnosis and Management. *Chest* 149, 252-261.
- 760 Sun, W., Li, J., Jiang, H.G., Ge, L.P., and Wang, Y. (2014). Diagnostic value of MUC1 and  
761 EpCAM mRNA as tumor markers in differentiating benign from malignant pleural effusion. *QJM :*  
762 *monthly journal of the Association of Physicians* 107, 1001-1007.
- 763 Tarricone, C., Dhavan, R., Peng, J., Areces, L.B., Tsai, L.H., and Musacchio, A. (2001).  
764 Structure and regulation of the CDK5-p25(ncK5a) complex. *Molecular cell* 8, 657-669.
- 765 Tartey, S., Matsushita, K., Imamura, T., Wakabayashi, A., Ori, D., Mino, T., and Takeuchi, O.  
766 (2015). Essential Function for the Nuclear Protein Akirin2 in B Cell Activation and Humoral  
767 Immune Responses. *J Immunol* 195, 519-527.
- 768 Tartey, S., Matsushita, K., Vandenbon, A., Ori, D., Imamura, T., Mino, T., Standley, D.M.,  
769 Hoffmann, J.A., Reichhart, J.M., Akira, S., *et al.* (2014). Akirin2 is critical for inducing  
770 inflammatory genes by bridging I $\kappa$ B-zeta and the SWI/SNF complex. *Embo j* 33, 2332-  
771 2348.
- 772 Taylor, A.E., Fluharty, M.E., Bjørngaard, J.H., Gabrielsen, M.E., Skorpen, F., Marioni, R.E.,  
773 Campbell, A., Engmann, J., Mirza, S.S., Loukola, A., *et al.* (2014). Investigating the possible  
774 causal association of smoking with depression and anxiety using Mendelian randomisation  
775 meta-analysis: the CARTA consortium. *BMJ Open* 4, e006141.
- 776 Taylor, M.P., Koyuncu, O.O., and Enquist, L.W. (2011). Subversion of the actin cytoskeleton  
777 during viral infection. *Nat Rev Microbiol* 9, 427-439.
- 778 Tian, C., Hromatka, B.S., Kiefer, A.K., Eriksson, N., Noble, S.M., Tung, J.Y., and Hinds, D.A.  
779 (2017). Genome-wide association and HLA region fine-mapping studies identify susceptibility  
780 loci for multiple common infections. *Nat Commun* 8, 599.

- 781 Tsuboi, S., and Meerloo, J. (2007). Wiskott-Aldrich syndrome protein is a key regulator of the  
782 phagocytic cup formation in macrophages. *The Journal of biological chemistry* 282, 34194-  
783 34203.
- 784 Unlu, G., Qi, X., Gamazon, E.R., Melville, D.B., Patel, N., Rushing, A.R., Hashem, M., Al-Faifi,  
785 A., Chen, R., Li, B., *et al.* (2020). Phenome-based approach identifies RIC1-linked Mendelian  
786 syndrome through zebrafish models, biobank associations and clinical studies. *Nat Med* 26, 98-  
787 109.
- 788 Walenna, N.F., Kurihara, Y., Chou, B., Ishii, K., Soejima, T., Itoh, R., Shimizu, A., Ichinohe, T.,  
789 and Hiromatsu, K. (2018). Chlamydia pneumoniae exploits adipocyte lipid chaperone FABP4 to  
790 facilitate fat mobilization and intracellular growth in murine adipocytes. *Biochem Biophys Res*  
791 *Commun* 495, 353-359.
- 792 Wang, L., Pittman, K.J., Barker, J.R., Salinas, R.E., Stanaway, I.B., Williams, G.D., Carroll, R.J.,  
793 Balmat, T., Ingham, A., Gopalakrishnan, A.M., *et al.* (2018). An Atlas of Genetic Variation  
794 Linking Pathogen-Induced Cellular Traits to Human Disease. *Cell Host Microbe* 24, 308-  
795 323.e306.
- 796 Watanabe, K., Stringer, S., Frei, O., Umicevic Mirkov, M., de Leeuw, C., Polderman, T.J.C., van  
797 der Sluis, S., Andreassen, O.A., Neale, B.M., and Posthuma, D. (2019). A global overview of  
798 pleiotropy and genetic architecture in complex traits. *Nat Genet.*
- 799 Wei, W.-Q., Bastarache, L.A., Carroll, R.J., Marlo, J.E., Osterman, T.J., Gamazon, E.R., Cox,  
800 N.J., Roden, D.M., and Denny, J.C. (2017). Evaluating phecodes, clinical classification software,  
801 and ICD-9-CM codes for phenome-wide association studies in the electronic health record. *PloS*  
802 *one* 12, e0175508-e0175508.
- 803 Willis, K.L., Patel, S., Xiang, Y., and Shisler, J.L. (2009). The effect of the vaccinia K1 protein on  
804 the PKR-eIF2alpha pathway in RK13 and HeLa cells. *Virology* 394, 73-81.
- 805 Xie, X., Lu, J., Kulbokas, E.J., Golub, T.R., Mootha, V., Lindblad-Toh, K., Lander, E.S., and  
806 Kellis, M. (2005). Systematic discovery of regulatory motifs in human promoters and 3' UTRs by  
807 comparison of several mammals. *Nature* 434, 338-345.
- 808 Yavorska, O.O., and Burgess, S. (2017). MendelianRandomization: an R package for  
809 performing Mendelian randomization analyses using summarized data. *Int J Epidemiol* 46,  
810 1734-1739.
- 811 Yu, B., Cheng, H.C., Brautigam, C.A., Tomchick, D.R., and Rosen, M.K. (2011). Mechanism of  
812 actin filament nucleation by the bacterial effector VopL. *Nat Struct Mol Biol* 18, 1068-1074.
- 813 Yu, Z., Song, H., Jia, M., Zhang, J., Wang, W., Li, Q., Zhang, L., and Zhao, W. (2017). USP1-  
814 UAF1 deubiquitinase complex stabilizes TBK1 and enhances antiviral responses. *The Journal*  
815 *of experimental medicine* 214, 3553-3563.
- 816 Zahm, J.A., Padrick, S.B., Chen, Z., Pak, C.W., Yunus, A.A., Henry, L., Tomchick, D.R., Chen,  
817 Z., and Rosen, M.K. (2013). The bacterial effector VopL organizes actin into filament-like  
818 structures. *Cell* 155, 423-434.

- 819 Zhang, X., Bogunovic, D., Payelle-Brogard, B., Francois-Newton, V., Speer, S.D., Yuan, C.,  
820 Volpi, S., Li, Z., Sanal, O., Mansouri, D., *et al.* (2015). Human intracellular ISG15 prevents  
821 interferon-alpha/beta over-amplification and auto-inflammation. *Nature* 517, 89-93.
- 822 Zheng, T., Liu, W., Oh, S.Y., Zhu, Z., Hu, B., Homer, R.J., Cohn, L., Grusby, M.J., and Elias,  
823 J.A. (2008). IL-13 receptor alpha2 selectively inhibits IL-13-induced responses in the murine  
824 lung. *J Immunol* 180, 522-529.  
825

826 **AUTHOR CONTRIBUTIONS**

827 Conceptualization, A.T.H. and E.R.G.; Methodology, A.T.H., D.Z., L.B., S.J.S., D.C.K., and  
828 E.R.G.; Investigation A.T.H., D.Z., L.B., L.W., S.S.Z., S.J.S., D.C.K., and E.R.G. Writing –  
829 Original Draft, A.T.H. and E.R.G.; Writing – Review and Editing, A.T.H., D.Z., L.B., L.W., S.S.Z.,  
830 S.J.S., D.C.K., and E.R.G, Funding Acquisition- A.T.H. and E.R.G., Supervision, E.R.G.

831

832 **ACKNOWLEDGEMENTS**

833 A.T.H. is supported by the National Institutes of Health (F30HL143826) and Vanderbilt  
834 University Medical Scientist Training Program (T32GM007347). E.R.G. is supported by the  
835 National Human Genome Research Institute of the National Institutes of Health under Award  
836 Number R35HG010718. E.R.G and S.S.Z. are funded by the National Heart, Lung, & Blood  
837 Institute of the National Institutes of Health under Award Number R01HL133559. The content is  
838 solely the responsibility of the authors and does not necessarily represent the official views of  
839 the National Institutes of Health. E.R.G. has also significantly benefitted from a Fellowship at  
840 Clare Hall, University of Cambridge (UK) and is grateful to the President and Fellows of the  
841 college for a stimulating intellectual home. Genomic data are also supported by individual  
842 investigator-led projects including U01-HG004798, R01-NS032830, RC2-GM092618, P50-  
843 GM115305, U01-HG006378, U19-HL065962, and R01-HD074711. Additional funding sources  
844 for BioVU are listed at <https://victr.vanderbilt.edu/pub/biovu/>. L.B. is supported by R01-  
845 LM010685. S.J.S. is supported R01-EB1019804, R01-AI145057, R01-EB014641, R01-  
846 HD085853, and DP1-HD086071. D.C.K. is supported by R01-AI118903, R21-AI144586, and  
847 R21-AI146520. D.C.K. and L.W. are supported by R21-AI133305.

848

849 **DECLARATION OF INTERESTS**



850 E.R.G. receives an honorarium from the journal *Circulation Research* of the American Heart  
851 Association, as a member of the Editorial Board. He performed consulting on pharmacogenetic  
852 analysis with the City of Hope / Beckman Research Institute.  
853

854 **FIGURE LEGENDS**

855 **Figure 1.** Overview of ID atlas resource. List of ID traits tested with corresponding Phecode  
 856 (phewascatalog.org) in parentheses.  
 857  
 858

| Infectious diseases                                                                                                                                                                                                                                                                                                                                                                                                                                                                                                                                                                                                                                                                                                                                                                                                                                                                                                                                                                                                                                                                                                                                                                                                                                                                                                                                                                                                                                                                                                                                                                                                                                                                                                                                                                                                                                                                                                                                                                                             | Study population                                                                                                                                                                                                                                          | Genetic analyses                                                                                                                                                                                                                                                                                                                                                                                                                                                                                                                |
|-----------------------------------------------------------------------------------------------------------------------------------------------------------------------------------------------------------------------------------------------------------------------------------------------------------------------------------------------------------------------------------------------------------------------------------------------------------------------------------------------------------------------------------------------------------------------------------------------------------------------------------------------------------------------------------------------------------------------------------------------------------------------------------------------------------------------------------------------------------------------------------------------------------------------------------------------------------------------------------------------------------------------------------------------------------------------------------------------------------------------------------------------------------------------------------------------------------------------------------------------------------------------------------------------------------------------------------------------------------------------------------------------------------------------------------------------------------------------------------------------------------------------------------------------------------------------------------------------------------------------------------------------------------------------------------------------------------------------------------------------------------------------------------------------------------------------------------------------------------------------------------------------------------------------------------------------------------------------------------------------------------------|-----------------------------------------------------------------------------------------------------------------------------------------------------------------------------------------------------------------------------------------------------------|---------------------------------------------------------------------------------------------------------------------------------------------------------------------------------------------------------------------------------------------------------------------------------------------------------------------------------------------------------------------------------------------------------------------------------------------------------------------------------------------------------------------------------|
| <p>Bacterial pneumonia (480.1)<br/>                     Candidiasis (112)<br/>                     Dermatophytosis and dermatomycosis (110)<br/>                     Encephalitis (323)<br/>                     Escherichia coli infection (041.4)<br/>                     Graft vs. host disease (081.1)<br/>                     Gram-negative septicemia (038.1)<br/>                     Gram-positive septicemia (038.2)<br/>                     Helicobacter pylori infection 041.8<br/>                     Helminthiasis (134)<br/>                     Hepatitis A infection (070.1)<br/>                     Hepatitis B infection (070.2)<br/>                     Hepatitis C infection (070.3)<br/>                     Herpes simplex infection (054)<br/>                     Herpes Zoster (053)<br/>                     Human Immunodeficiency Virus infection (071)<br/>                     Human papillomavirus infection (078)<br/>                     Infection with drug-resistant organism (041.9)<br/>                     Infectious mononucleosis (079.2)<br/>                     Influenza infection (481)<br/>                     Intestinal infection (008)<br/>                     Meningitis (320)<br/>                     Mycoses (117)<br/>                     Other central nervous system infections and poliomyelitis (324)<br/>                     Other infectious and parasitic diseases (136)<br/>                     Protozoan infection (131)<br/>                     Sepsis (994)<br/>                     Sexually transmitted disease excluding HIV and hepatitis (090)<br/>                     Spirochetal infection (130)<br/>                     Staphylococcus infection (041.1)<br/>                     Streptococcus infection (041.2)<br/>                     Tuberculosis (010)<br/>                     Varicella infection (079.1)<br/>                     Viral infection (079)<br/>                     Viral pneumonia (480.2)</p> |    | <p>GWAS for 35 ID traits</p> <p>TWAS for 35 ID traits</p> <p>Development of tissue-specific TWAS catalog of ID traits</p> <p>Gene-level replication in the UK Biobank &amp; FinnGen</p> <p>Pathogen genus determined by serology and culture linked to host genetic information</p> <p>Phenome scan across cardiac, hematologic, respiratory, and neurologic traits</p> <p>Development of tissue-specific TWAS catalog of pathogen-induced cellular phenotypes</p> <p>Mendelian Randomization to infer causal relationships</p> |

859  
 860

861 **Figure 2.** Genome-wide association study (GWAS) of ID traits. (A) Threshold for inclusion of  
 862 SNP associations was set at  $1.0 \times 10^{-4}$ . Genome-wide significance for an ID trait was set at  $p =$   
 863  $5.0 \times 10^{-8}$ , as indicated by the horizontal dotted line. The subset of 13 ID traits (among the full set  
 864 tested) with variants that meet the traditional genome-wide significance threshold are included.  
 865 The top variant association for each of the 13 traits is labeled. The most significant variant  
 866 association is with bacterial pneumonia ( $p < 1.0 \times 10^{-30}$ ). (B) LocusZoom plot at the sentinel  
 867 variant, rs17139584, associated with bacterial pneumonia. Several variants in low LD ( $r^2 < 0.20$ )  
 868 with the sentinel variant, including variants in the cystic fibrosis gene *CFTR* and in the *MET*  
 869 gene >650 Kb upstream, are genome-wide significant for bacterial pneumonia. The sentinel  
 870 variant remains statistically significant ( $p = 0.007$ ) after adjusting for a diagnosis of cystic  
 871 fibrosis.  
 872

A

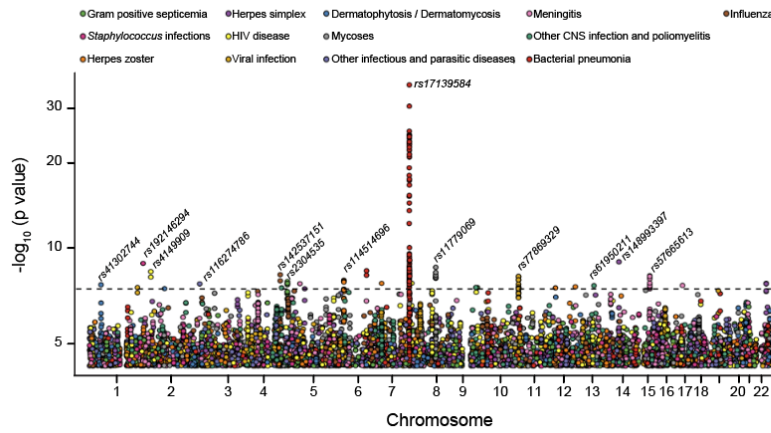

B

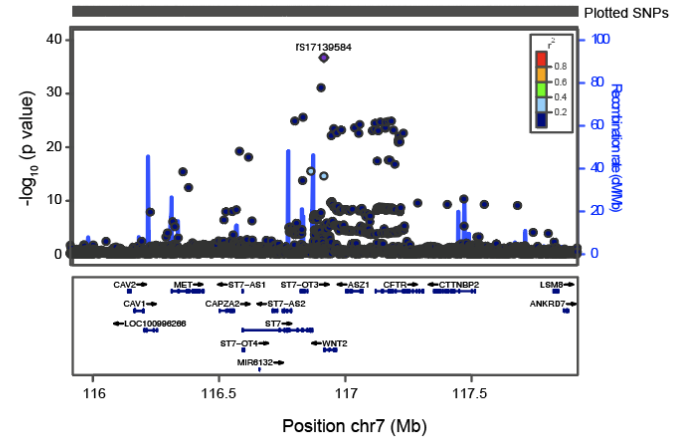

874 **Figure 3.** Transcriptome-wide association studies (TWAS) of 35 ID traits reveal novel ID-  
875 associated genes. The genetic component of gene expression for autosomal genes was  
876 individually tested for association with each of 35 ID traits (see Methods). (A) Experiment-wide  
877 or ID-specific significant genes are displayed on the ideogram using their chromosomal  
878 locations and color-coded using the associated ID traits. Most associations represent unique  
879 genes within the implicated loci, suggesting the genes are not tagging another causal gene. A  
880 locus on chromosome 9, by contrast, shows multiple associations with the same ID trait, which  
881 may indicate correlation of the expression traits with a single causal gene in the locus. (B)  
882 Manhattan plot shows the PrediXcan associations with sepsis (Phecode 994; number of cases  
883 2,921; number of controls 22,874). Dashed line represents  $p < 5 \times 10^{-5}$ . The gene *IKZF5* was  
884 significant ( $p = 8.16 \times 10^{-7}$ ) after Bonferroni correction for the number of genes tested. (C) Q-Q  
885 plot of FinnGen replication p-values for genes associated with intestinal infection ( $p < 0.05$ ) in  
886 BioVU (red) compared to the remaining set of genes (black). The ID-associated genes tended to  
887 be more significant in the independent dataset than the remaining genes, as evidenced by the  
888 leftward shift in the Q-Q plot.  
889

A

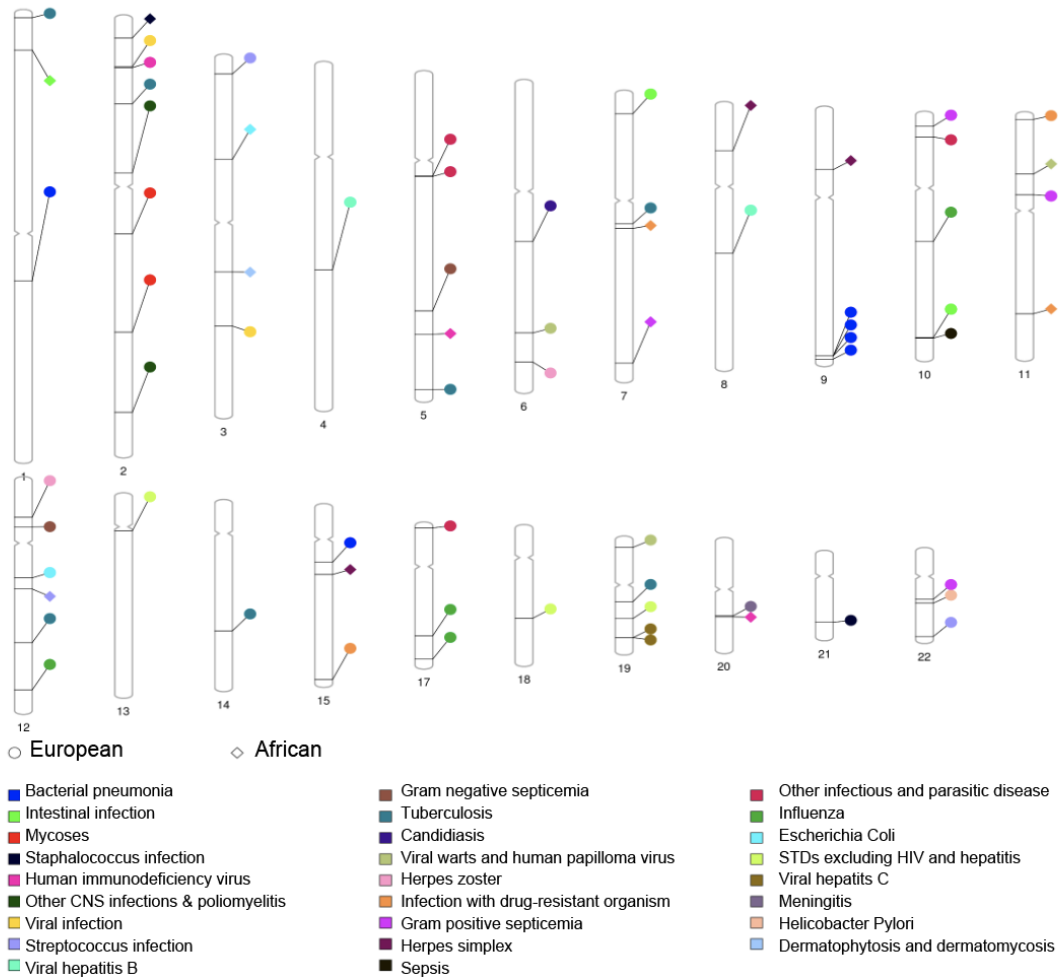

B

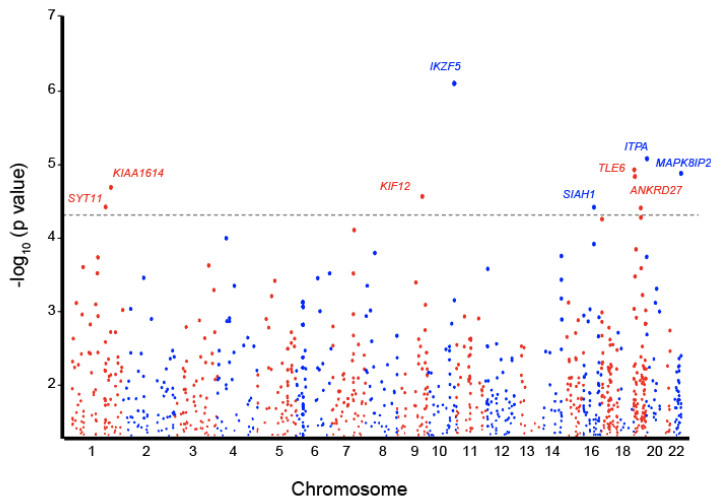

C

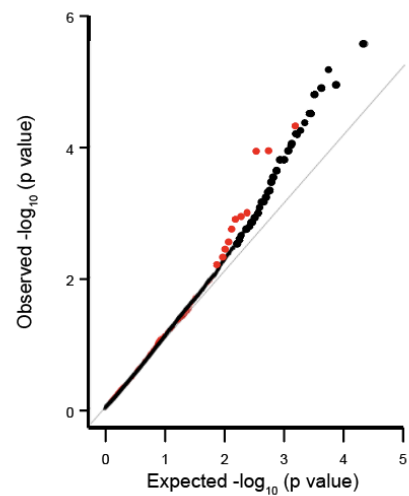

892 **Figure 4.** Enriched pathways across multiple ID traits and pathogen evolutionary strategies to  
 893 promote infection. (A) Gene set enrichment analysis of ID associated genes having also  
 894 nominal associations with additional ID traits. All gene sets satisfied false discovery rate < 0.05  
 895 for pathway enrichment and included known biological processes (e.g. protein complex  
 896 formation, cytoskeletal protein binding, cell death, actin motility, etc.) relevant to the biology of  
 897 infection. (B) Highly conserved motif “TCCCRNNRTGC”, within 4 kb of TSS of ID-associated  
 898 genes, is enriched among the multi-ID associated genes and does not match any known  
 899 transcription factor binding site. Genes with this motif near the TSS include *AKIRIN2*, *CDK5*,  
 900 *RAD50*, *PTCD3*, and *CERS3*. This suggests a strategy that the pathogens may broadly exploit  
 901 to hijack the host transcriptional machinery. (C) CDK5 is an example of a multi-ID associated  
 902 gene, significantly associated with Gram-positive septicemia and nominally associated with  
 903 other IDs, including herpes simplex virus. CDK5 is activated by its regulatory subunit p35/p25.  
 904 The CDK5-p25 complex regulates inflammation (whose large-scale disruption is characteristic  
 905 of septicemia) and induces cytoskeletal disruption in neurons (where the herpes virus promotes  
 906 lifelong latent infection). Structure of the CDK5-p25 complex (PDB: 1H4L, (Tarricone et al.,  
 907 2001)) is shown here. The A and B chains are required for cytoskeletal protein binding (CDK5),  
 908 whereas the D and E chains (p25) are involved in actin regulation and kinase function, all  
 909 functions implicated in our pathway analysis. (D) Multi-ID associated genes identified by our  
 910 study have also been observed in host-pathogen protein complexes (by coimmunoprecipitation,  
 911 affinity chromatography, and two-hybrid approaches, among others) for the specific pathogens  
 912 responsible for the ID traits. Interactions of pathogen proteins with CDK5 are shown here.  
 913 M2\_134A1 (UniProt: PO6821) is the matrix protein 2 component of the proton-selective ion  
 914 channel required for influenza A viral genome release during cellular entry and is targeted by  
 915 the anti-viral drug amantadine (Hay et al., 1985). VE7\_HP16 (UniProt: PO3129) is a  
 916 component of human papillomavirus (HPV) required for cellular transformation and trans-  
 917 activation through disassembly of E2F1 transcription factor from RB1 leading to impaired  
 918 production of type I interferons (Barnard et al., 2000; Chellappan et al., 1992; Phelps et al.,  
 919 1988). VE7\_HP31 (UnitProt: P17387) engages histone deacetylases 1 and 2 to promote  
 920 HPV31 genome maintenance (Longworth and Laimins, 2004). VCYCL\_HHV8P (UniProt:  
 921 Q77Q36) is a cyclin homolog within the human herpesvirus 8 genome that has been shown to  
 922 control cell cycle through CDK6 and induce apoptosis through Bcl2 (Duro et al., 1999; Ojala et  
 923 al., 1999; Ojala et al., 2000). F5HC81\_HHV8 (UniProt: F5HC81) is not well-characterized, but  
 924 predicted to act as a viral cyclin homolog. This suggests a second strategy that the pathogens  
 925 exploit, i.e., alteration of the host proteome, to promote infection.

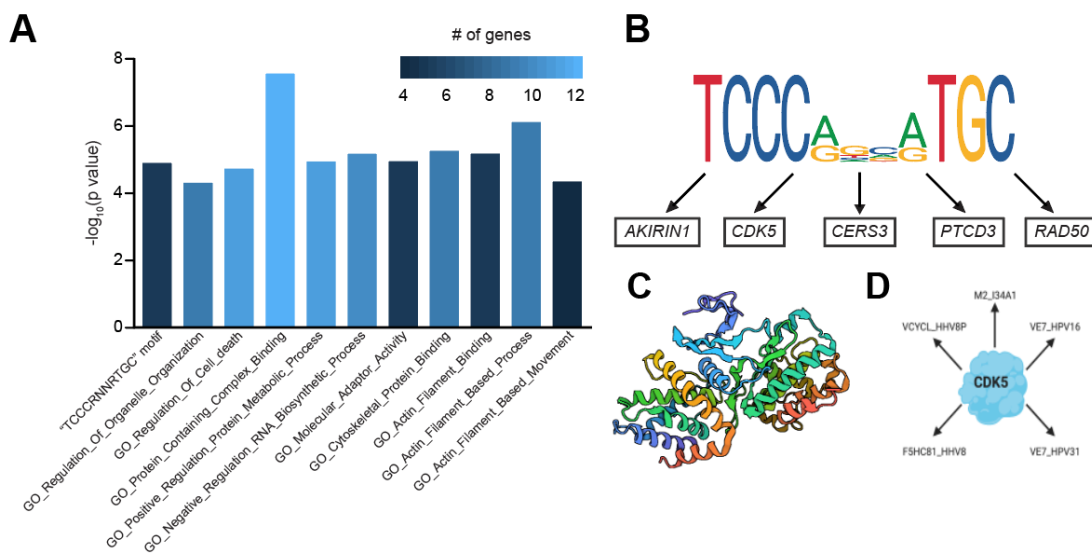

927 **Figure 5. Pathogen genus identification from clinical blood cultures linked to whole-**  
 928 **genome information reveals insights into host colonization and infection.** (A) Bacterial  
 929 and fungal pathogens identified from blood (n = 7,699 positive cultures across 94 genera) from  
 930 2,417 individuals. (B) Area under the receiver operating characteristic curve (AUC), showing that  
 931 the clinical trait *Staphylococcus* infection (Phecode = 041.1) performs well in classifying  
 932 *Staphylococcus aureus* infection based on blood culture data from (A), with AUC of 0.938 with  
 933 standard error of 0.008. The first PC in the European ancestry samples and a model with age,  
 934 sex, and the first 5 PCs, both with substantially lower performance (AUC of 0.514 and 0.568,  
 935 respectively), are also shown.  
 936  
 937

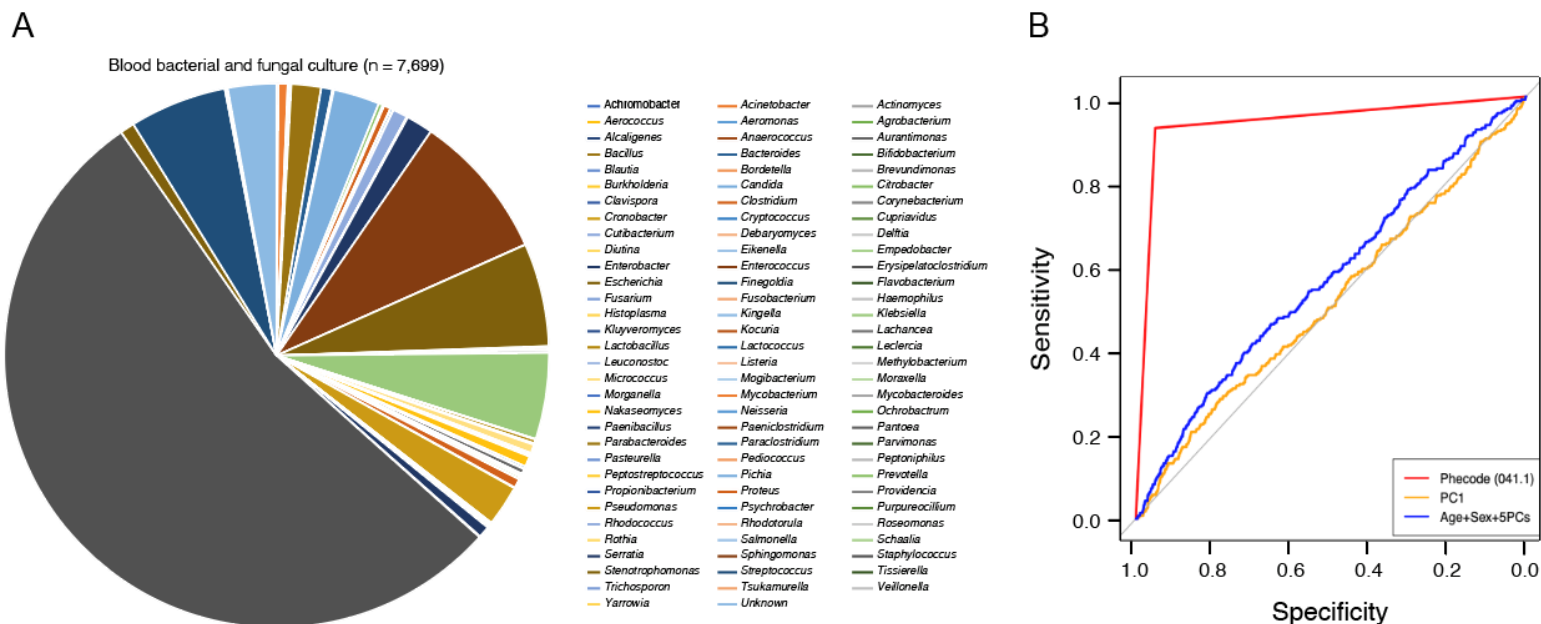

939 **Figure 6.** Phenome-scale scan of 70 ID-associated genes across 197 cardiovascular, 940 hematologic, neurologic, and respiratory phenotypes (cases > 200) in BioVU 941 (phewascatalog.org) identifies genes association with both disease risk and corresponding 942 known complications of the infection. (A) Each dot represents the association of an ID- 943 associated gene with one of the 197 (hematologic, respiratory, cardiovascular, and neurologic) 944 phenotypes. Horizontal red line indicates threshold for statistical significance correcting for 945 number of phenotypes and ID-associated genes tested. We identify four gene-phenotype pairs 946 reaching experiment-wide significance: 1) *WFDC12*, our most significant ( $p = 4.23 \times 10^{-6}$ ) 947 association with meningitis, is also associated with cerebral edema and compression of brain ( $p = 1.35 \times 10^{-6}$ ), a feared clinical complication of meningitis (Niemöller and Täuber, 1989); 2) 948 *TM7SF3*, the most significant gene with Gram-negative sepsis ( $p = 1.37 \times 10^{-6}$ ), is also 949 associated with acidosis ( $p = 1.95 \times 10^{-6}$ ), a known metabolic derangement associated with 950 severe sepsis (Suetrong and Walley, 2016); 3) *TXLNB*, the most significant gene associated 951 with viral warts and human papillomavirus infection ( $p = 4.35 \times 10^{-6}$ ), is also associated with 952 abnormal involuntary movements,  $p = 1.39 \times 10^{-6}$ ; and 4) *RAD18*, the most significant gene 953 associated with Streptococcus infection ( $p = 2.01 \times 10^{-6}$ ), is also associated with anemia in 954 neoplastic disease ( $p = 3.10 \times 10^{-6}$ ). (B) Mendelian randomization framework. P-value threshold 955 used to define an instrumental variable was set at  $p < 1.0 \times 10^{-5}$  and variants in linkage 956 equilibrium ( $r^2 = 0.01$ ) were used. (C) Mendelian Randomization provides strong support for 957 causal exposure-outcome relationships for 1) meningitis and compression of brain (left, median- 958 weighted estimator  $p = 2.7 \times 10^{-3}$ ); and 2) gram-negative septicemia and acidosis (right, median- 959 weighted estimator  $p = 2.0 \times 10^{-7}$ ). Grey lines indicate 95% confidence interval. 960

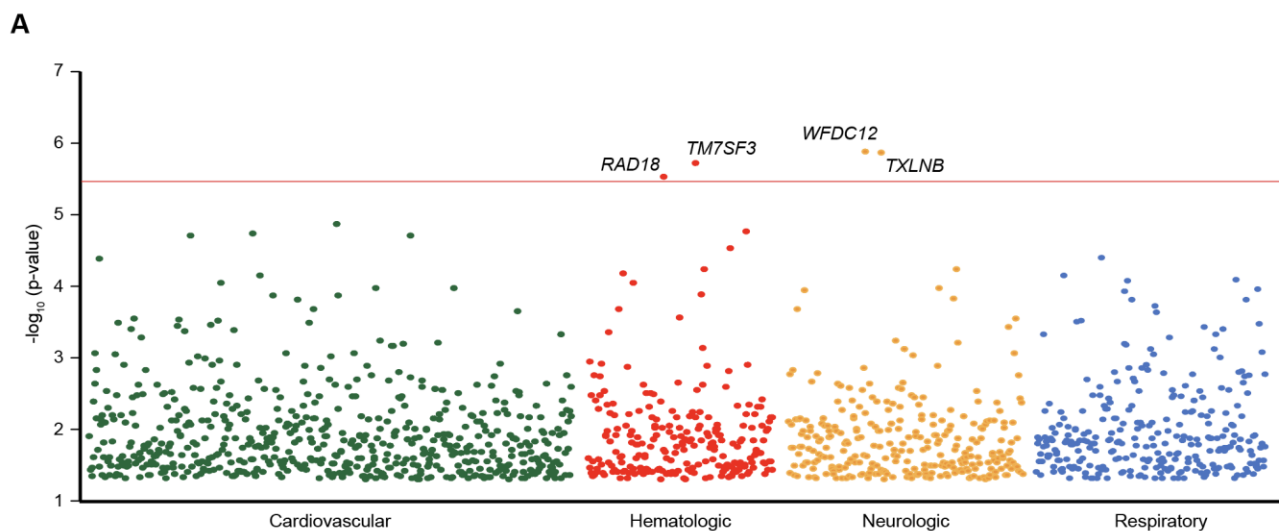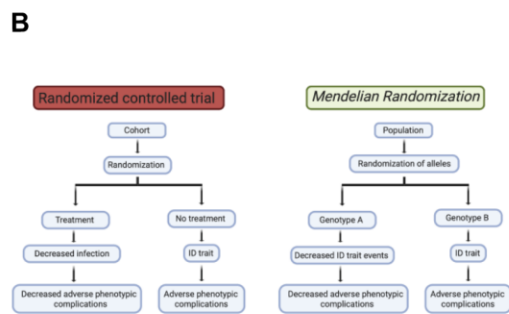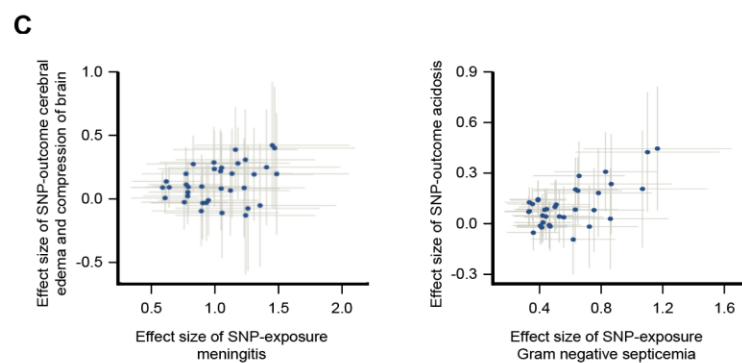



962 **Figure 7.** TWAS of 79 pathogen-exposure induced cellular traits improves identification of  
 963 pathogen-induced cellular mechanisms. (A) Genes reaching significance in Hi-HOST after  
 964 correction for the total number of genes and cellular phenotypes tested. (B) Integration of EHR  
 965 data into Hi-HOST facilitates replication of gene-level associations with a clinical ID trait. Genes  
 966 nominally associated ( $p < 0.05$ ) with Gram-positive septicemia (Phecode 038.2) in BioVU show  
 967 significant enrichment for *Staphylococcus* toxin exposure, a Hi-HOST phenotype. The Q-Q plot  
 968 shows the distribution of TWAS p-values in the Hi-HOST data for the top genes in the BioVU  
 969 data. False discovery rate (FDR) thresholds at 0.25 (blue), 0.10 (green), and 0.05 (red) are  
 970 shown. (C) Integration of EHR data into Hi-HOST also improves the signal-to-noise ratio in Hi-  
 971 HOST. For example, the top 300 genes nominally associated with *Staphylococcus* infection  
 972 (Phecode 041.1) in BioVU ( $p < 0.016$ , red) depart from null expectation for their TWAS  
 973 associations with *Staphylococcus* toxin exposure in Hi-HOST compared to the full set of genes  
 974 (black).  
 975  
 976

A

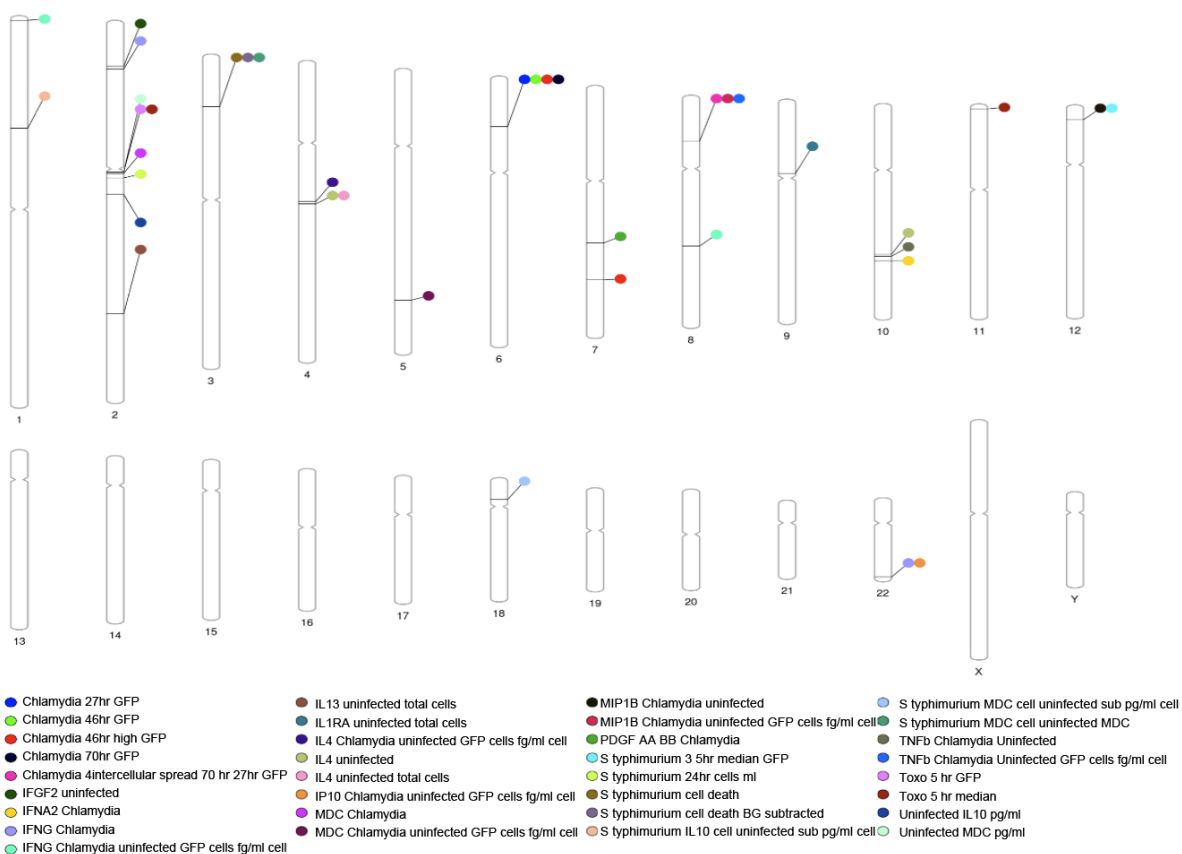

B

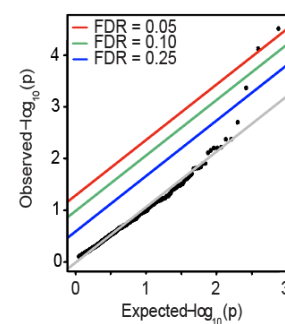

C

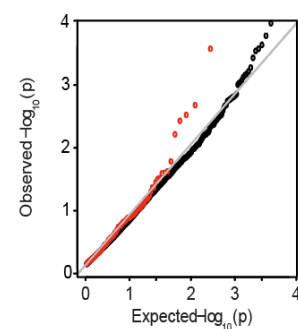

978

979

980 **Table 1.** Significant trait-specific gene-level associations with individual infectious  
 981 disease phenotypes (for which number of cases > 100). Experiment-wide findings are  
 982 noted in **bold**.

983

| Gene              | PheCode      | Phenotype                                      | Cases        | Controls      | Ancestry        | Odds ratio  | P value                     |
|-------------------|--------------|------------------------------------------------|--------------|---------------|-----------------|-------------|-----------------------------|
| IKZF5             | 994          | Sepsis                                         | 2,921        | 22,874        | European        | 0.91        | 8.16x10 <sup>-7</sup>       |
| AKIRIN2           | 112          | Candidiasis                                    | 2,284        | 21,426        | European        | 0.91        | 2.83x10 <sup>-6</sup>       |
| PSMG1             | 041.1        | <i>Staphylococcus</i> infection                | 2,180        | 19,844        | European        | 0.90        | 3.13x10 <sup>-6</sup>       |
| AGTR1             | 079          | Viral infection                                | 1,811        | 20,904        | European        | 1.12        | 1.49x10 <sup>-6</sup>       |
| SLC35F6           | 079          | Viral infection                                | 1,811        | 20,904        | European        | 0.89        | 3.30x10 <sup>-6</sup>       |
| <b>NDUFA4</b>     | <b>008</b>   | <b>Intestinal infection</b>                    | <b>1,608</b> | <b>24,187</b> | <b>European</b> | <b>1.16</b> | <b>1.83x10<sup>-9</sup></b> |
| <b>C10orf120</b>  | <b>008</b>   | <b>Intestinal infection</b>                    | <b>1,608</b> | <b>24,187</b> | <b>European</b> | <b>1.13</b> | <b>4.92x10<sup>-8</sup></b> |
| RAD18             | 041.2        | <i>Streptococcus</i> infection                 | 1,262        | 19,844        | European        | 1.16        | 2.01x10 <sup>-6</sup>       |
| MAPK8IP2          | 041.2        | <i>Streptococcus</i> infection                 | 1,262        | 19,844        | European        | 1.14        | 3.81x10 <sup>-6</sup>       |
| AVIL              | 041.4        | <i>Escherichia Coli</i>                        | 1,231        | 19,844        | European        | 1.16        | 1.58x10 <sup>-6</sup>       |
| STAP2             | 078          | Viral warts and human papilloma virus          | 1,152        | 20,904        | European        | 1.15        | 2.33x10 <sup>-6</sup>       |
| TXLNB             | 078          | Viral warts and human papilloma virus          | 1,152        | 20,904        | European        | 0.86        | 4.35x10 <sup>-6</sup>       |
| SLCO1A2           | 053          | Herpes zoster                                  | 989          | 20,904        | European        | 0.93        | 1.64x10 <sup>-7</sup>       |
| CLDN20            | 053          | Herpes zoster                                  | 989          | 20,904        | European        | 0.86        | 4.54x10 <sup>-6</sup>       |
| IGF2              | 041.9        | Infection with drug-resistant organism         | 893          | 19,844        | European        | 0.83        | 4.01x10 <sup>-7</sup>       |
| CERS3             | 041.9        | Infection with drug-resistant organism         | 893          | 19,844        | European        | 1.17        | 4.18x10 <sup>-6</sup>       |
| <b>TOR4A</b>      | <b>480.1</b> | <b>Bacterial pneumonia</b>                     | <b>862</b>   | <b>18,054</b> | <b>European</b> | <b>0.84</b> | <b>5.15x10<sup>-8</sup></b> |
| FAM166A           | 480.1        | Bacterial pneumonia                            | 862          | 18,054        | European        | 1.19        | 1.10x10 <sup>-7</sup>       |
| C9orf173          | 480.1        | Bacterial pneumonia                            | 862          | 18,054        | European        | 1.18        | 4.48x10 <sup>-7</sup>       |
| PIP5K1A           | 480.1        | Bacterial pneumonia                            | 862          | 18,054        | European        | 1.16        | 7.00x10 <sup>-7</sup>       |
| NELFB             | 480.1        | Bacterial pneumonia                            | 862          | 18,054        | European        | 0.86        | 1.87x10 <sup>-6</sup>       |
| AVEN              | 480.1        | Bacterial pneumonia                            | 862          | 18,054        | European        | 0.85        | 3.31x10 <sup>-6</sup>       |
| TM7SF3            | 038.1        | Gram negative septicemia                       | 820          | 19,844        | European        | 1.17        | 1.37x10 <sup>-6</sup>       |
| RAD50             | 038.1        | Gram negative septicemia                       | 820          | 19,844        | European        | 1.17        | 4.50x10 <sup>-6</sup>       |
| ZNF577            | 070.3        | Viral hepatitis C                              | 808          | 20,904        | European        | 0.84        | 6.21x10 <sup>-7</sup>       |
| ZNF649            | 070.3        | Viral hepatitis C                              | 808          | 20,904        | European        | 0.85        | 1.85x10 <sup>-6</sup>       |
| <b>SETD9</b>      | <b>136</b>   | <b>Other infectious and parasitic diseases</b> | <b>746</b>   | <b>24,770</b> | <b>European</b> | <b>0.83</b> | <b>3.04x10<sup>-8</sup></b> |
| <b>AC022431.1</b> | <b>136</b>   | <b>Other infectious and parasitic diseases</b> | <b>746</b>   | <b>24,770</b> | <b>European</b> | <b>1.20</b> | <b>7.92x10<sup>-8</sup></b> |
| MYO1C             | 136          | Other infectious and parasitic diseases        | 746          | 24,770        | European        | 1.10        | 2.97x10 <sup>-6</sup>       |
| NUDT5             | 136          | Other infectious and parasitic diseases        | 746          | 24,770        | European        | 0.84        | 3.52x10 <sup>-6</sup>       |
| MAATS1            | 110          | Dermatophytosis and dermatomycosis             | 654          | 3,330         | African         | 0.80        | 4.82x10 <sup>-6</sup>       |
| <b>PTPN4</b>      | <b>117</b>   | <b>Mycoses</b>                                 | <b>627</b>   | <b>21,426</b> | <b>European</b> | <b>0.79</b> | <b>1.56x10<sup>-7</sup></b> |
| WIPF1             | 117          | Mycoses                                        | 627          | 21,426        | European        | 1.20        | 2.72x10 <sup>-6</sup>       |
| <b>ALX4</b>       | <b>038.2</b> | <b>Gram positive septicemia</b>                | <b>613</b>   | <b>19,844</b> | <b>European</b> | <b>1.25</b> | <b>4.21x10<sup>-8</sup></b> |
| C22orf31          | 038.2        | Gram positive septicemia                       | 613          | 19,844        | European        | 0.81        | 2.05x10 <sup>-6</sup>       |
| IL2RA             | 038.2        | Gram positive septicemia                       | 613          | 19,844        | European        | 1.20        | 3.88x10 <sup>-6</sup>       |
| VVA5B1            | 008          | Intestinal infection                           | 368          | 4,060         | African         | 1.30        | 3.85x10 <sup>-6</sup>       |
| ATP6V1C2          | 041.1        | <i>Staphylococcus</i> infection                | 358          | 3,337         | African         | 1.33        | 1.51x10 <sup>-6</sup>       |
| WDR66             | 481          | Influenza                                      | 272          | 18,054        | European        | 0.71        | 3.47x10 <sup>-7</sup>       |
| FAM20A            | 481          | Influenza                                      | 272          | 18,054        | European        | 0.77        | 1.51x10 <sup>-6</sup>       |
| HKDC1             | 481          | Influenza                                      | 272          | 18,054        | European        | 1.34        | 2.20x10 <sup>-6</sup>       |
| ASPSCR1           | 481          | Influenza                                      | 272          | 18,054        | European        | 1.35        | 2.76x10 <sup>-6</sup>       |
| FAM208A           | 041.4        | <i>Escherichia Coli</i>                        | 243          | 3,337         | African         | 1.42        | 1.15x10 <sup>-6</sup>       |
| TBK1              | 041.2        | <i>Streptococcus</i> infection                 | 229          | 3,337         | African         | 1.41        | 4.70x10 <sup>-6</sup>       |
| DNAJC5G           | 071          | Human immunodeficiency virus                   | 196          | 20,904        | European        | 1.08        | 7.36x10 <sup>-7</sup>       |
| FABP4             | 070.2        | Viral hepatitis B                              | 166          | 20,904        | European        | 0.70        | 4.39x10 <sup>-6</sup>       |
| ANK2              | 070.2        | Viral hepatitis B                              | 166          | 20,904        | European        | 0.77        | 4.56x10 <sup>-6</sup>       |
| HIP1              | 041.9        | Infection with drug-resistant organism         | 165          | 3,337         | African         | 1.46        | 6.74x10 <sup>-7</sup>       |
| C11orf53          | 041.9        | Infection with drug-resistant organism         | 165          | 3,337         | African         | 0.72        | 4.98x10 <sup>-6</sup>       |
| <b>EPCAM</b>      | <b>010</b>   | <b>Tuberculosis</b>                            | <b>156</b>   | <b>19,844</b> | <b>European</b> | <b>1.40</b> | <b>5.04x10<sup>-8</sup></b> |
| <b>AL589739.1</b> | <b>010</b>   | <b>Tuberculosis</b>                            | <b>156</b>   | <b>19,844</b> | <b>European</b> | <b>1.55</b> | <b>9.46x10<sup>-8</sup></b> |
| PROX2             | 010          | Tuberculosis                                   | 156          | 19,844        | European        | 1.40        | 9.70x10 <sup>-7</sup>       |
| USP44             | 010          | Tuberculosis                                   | 156          | 19,844        | European        | 1.44        | 1.07x10 <sup>-6</sup>       |
| GPRIN1            | 010          | Tuberculosis                                   | 156          | 19,844        | European        | 1.49        | 2.55x10 <sup>-6</sup>       |
| NSUN5             | 010          | Tuberculosis                                   | 156          | 19,844        | European        | 0.75        | 2.76x10 <sup>-6</sup>       |
| C19orf55/PROSER3  | 010          | Tuberculosis                                   | 156          | 19,844        | European        | 1.51        | 3.30x10 <sup>-6</sup>       |
| DNAJC17           | 054          | Herpes simplex                                 | 154          | 3,241         | African         | 0.65        | 2.75x10 <sup>-7</sup>       |
| CHMP5             | 054          | Herpes simplex                                 | 154          | 3,241         | African         | 1.36        | 2.22x10 <sup>-6</sup>       |

|              |            |                                                             |            |               |                 |             |                             |
|--------------|------------|-------------------------------------------------------------|------------|---------------|-----------------|-------------|-----------------------------|
| GNRH1        | 054        | Herpes simplex                                              | 154        | 3,241         | African         | 1.47        | 4.64x10 <sup>-6</sup>       |
| TXNL1        | 152        | Sexually transmitted infections excluding HIV and hepatitis | 152        | 25,643        | European        | 0.64        | 3.92x10 <sup>-7</sup>       |
| LTBP4        | 152        | Sexually transmitted infections excluding HIV and hepatitis | 152        | 25,643        | European        | 0.70        | 2.13x10 <sup>-6</sup>       |
| CRYL1        | 152        | Sexually transmitted infections excluding HIV and hepatitis | 152        | 25,643        | European        | 0.70        | 2.23x10 <sup>-6</sup>       |
| LIMK2        | 041.8      | Helicobacter Pylori                                         | 150        | 19,844        | European        | 0.71        | 2.88x10 <sup>-6</sup>       |
| WFDC12       | 320        | Meningitis                                                  | 144        | 25,170        | European        | 1.16        | 4.23x10 <sup>-6</sup>       |
| TNNC2        | 071        | Human immunodeficiency virus                                | 139        | 3,241         | African         | 1.44        | 2.49x10 <sup>-6</sup>       |
| PRELID2      | 071        | Human immunodeficiency virus                                | 139        | 3,241         | African         | 1.47        | 2.68x10 <sup>-6</sup>       |
| <b>PTCD3</b> | <b>324</b> | <b>Other CNS infections and poliomyelitis</b>               | <b>136</b> | <b>25,170</b> | <b>European</b> | <b>0.89</b> | <b>3.74x10<sup>-8</sup></b> |
| ATG9A        | 324        | Other CNS infections and poliomyelitis                      | 136        | 25,170        | European        | 0.76        | 2.46x10 <sup>-6</sup>       |
| EIF3M        | 078        | Viral warts and human papilloma virus                       | 136        | 3,241         | African         | 1.48        | 3.22x10 <sup>-6</sup>       |
| CDK5         | 038.2      | Gram positive septicemia                                    | 114        | 3,337         | African         | 0.65        | 3.64x10 <sup>-6</sup>       |

984

985

986

987

988

989

990

991 **STAR★METHODS**

992 **CONTACT FOR REAGENT AND RESOURCE SHARING**

993 Further information and requests for resources and reagents should be directed to and will be  
994 fulfilled by the Lead Contact, Eric R. Gamazon ([eric.gamazon@vanderbilt.edu](mailto:eric.gamazon@vanderbilt.edu)).

995

996 **EXPERIMENTAL MODEL AND SUBJECT DETAILS**

997 *BioVU*

998 BioVU, one of the largest DNA biobanks tied to an EHR database, is a subset of the  
999 synthetic derivative (SD), a deidentified electronic health record, consisting of individuals with  
1000 whole-genome genetic information. Detailed information on the construction, utilization, ethics,  
1001 and policies of the BioVU resource is described elsewhere (Roden et al., 2008). ID traits were  
1002 defined based on a hierarchical grouping of International Classification of Diseases, Ninth  
1003 Revision (ICD-9) codes into phenotype codes (Phecodes) representing clinical traits, as  
1004 previously described (Denny et al., 2013; Denny et al., 2010). (See below for a description of  
1005 pathogen culture and viral test data in the BioVU individuals, including genera detected from  
1006 different types of cultures.) We used version 1.2 of the Phecode Map containing 1,965  
1007 Phecodes based on 20,203 ICD-9 codes, which substantially improves signal-to-noise and more  
1008 accurately reflects the clinical trait. Phecodes may exclude related phenotypes (e.g., in the case  
1009 of Gram negative septicemia (Phecode = 038.1), the range of Phecodes given by 010-041.99,  
1010 involving bacterial infection) and, importantly, include the definition of the appropriate control  
1011 group (Wei et al., 2017). Detailed description of Phecode trait maps can be found at  
1012 [pewascatalog.org](http://pewascatalog.org). As an efficient and viable model for human genetics research, the Phecode  
1013 system has been used to perform phenome-wide association studies (PheWAS) for validation of

1014 known genetic associations and discovery of new genetic disorders (Denny et al., 2013; Unlu et  
1015 al., 2020).

1016

1017 *Pathogen culture and virology data linked to whole-genome genetic information*

1018 The SD consists of a wide range of clinical microbiological data. For individuals with  
1019 whole-genome genetic information, we analyzed pathogen (bacterial, mycobacterial, and fungal)  
1020 culture data derived from the following positive cultures for the indicated clinical samples: 1)  
1021 blood (n = 7,699), 2) sputum (n = 2,478), 3) sinus/nasopharyngeal (n = 1,820), 4) bronchial-  
1022 alveolar lavage (n = 1,265), and 5) tracheal sampling (n = 422). Furthermore, we analyzed a  
1023 respiratory panel containing 28 viral strains from 2,890 individuals with whole-genome genetic  
1024 information. Viral strains included the following: 1) Adenovirus, 2) Bocavirus, 3) Bordetella  
1025 parapertussis, 4) Bordetella pertussis, 5) Chlamydia pneumoniae, 6) Coronavirus 229E, 7)  
1026 Coronavirus HKU1, 8) Coronavirus NL63, 9) Coronavirus NOS, 10) Coronavirus OC43, 11)  
1027 Enterovirus/Rhinovirus, 12) Human Metapneumovirus, 13) Influenza A, 14) Influenza A, H1, 15)  
1028 Influenza A, H1N1, 16) Influenza A, H3, 17) Influenza B, 18) Mycoplasma pneumoniae, 19)  
1029 Parainfluenza, 20) Parainfluenza 1, 21) Parainfluenza 2, 22) Parainfluenza 3, 23) Parainfluenza  
1030 4, 24) Respiratory syncytial virus (RSV), 25) RSV, A, 26) RSV, B, and 27) Rhinovirus. The  
1031 pathogen information for each individual in our study included: 1) Total number of cultures; 2)  
1032 Number of negative cultures (i.e., no pathogen growth); 3) Number of ambiguous cultures (i.e.,  
1033 normal upper respiratory bacteria or low level contamination); 4) Number of positive cultures  
1034 (i.e., the number of cultures with growth consistent with clinical infection); 5) Genus or genera  
1035 isolated (up to 96 unique genera per sample site), which ranged from zero to 10 per sample.

1036

1037 **METHODS DETAILS**

1038 *GWAS of ID traits*

1039 GWAS of the ID traits were performed on the 23,294 BioVU individuals of European  
1040 ancestry. Quality control pre-processing and SNP-level imputation were conducted, as  
1041 previously described (Unlu et al., 2020). Genomic ancestry was quantified using principal  
1042 components analysis of the genotype data (Derks et al., 2017; Price et al., 2006). The  
1043 association analysis was performed using age, gender, batch, and the first five principal  
1044 components as covariates.

1045

#### 1046 *Conditional SNP-level analysis*

1047 We performed conditional analysis on the top GWAS association with the ID trait (in this  
1048 case, bacterial pneumonia) to determine whether it was driven by a related covariate (in this  
1049 case, cystic fibrosis status). We used logistic regression to model the conditional probability of  
1050 the infectious disease:

$$1051 \ln \frac{P(Y=1 | s)}{1 - (P(Y=1 | s))} = \beta_0 + \beta_1 s + \beta_2 (CF)$$

1052 where  $s$  is the genotype at the sentinel variant,  $Y$  is the disease (i.e., bacterial pneumonia)  
1053 status, and  $CF$  is the covariate of interest (i.e., cystic fibrosis).

1054

#### 1055 *Transcriptome-wide association studies (TWAS) using PrediXcan*

1056 We performed multi-tissue PrediXcan (Barbeira et al., 2019; Gamazon et al., 2018; Gamazon et al., 2015) in the  
1057 23,294 BioVU subjects. Experiment-wide significance was determined using Bonferroni  
1058 correction for the total number of genes tested ( $n = 9,868$ ) across 35 phenotypes (i.e.,  $p <$   
1059  $1.4 \times 10^{-7}$ ). Trait-specific significance was determined using Bonferroni correction for the total  
1060 number of genes tested ( $n = 9,868$ ,  $p < 5.07 \times 10^{-6}$ ). Genomic ancestry was quantified using  
1061 principal components analysis (Derks et al., 2017; Price et al., 2006).

1062

1063 *GWAS and TWAS Replication in the UK Biobank and FinnGen consortia*

1064 Replication of GWAS and TWAS was performed in the UK Biobank (Bycroft et al., 2018)  
1065 and FinnGen consortia (Locke et al., 2019). We used the UK Biobank  
1066 (<http://www.nealelab.is/uk-biobank>) and the FinnGen ([https://www.finnngen.fi/en/access\\_results](https://www.finnngen.fi/en/access_results))  
1067 summary results to generate the gene-level associations.

1068  
1069 *Classification of pathogen infection based on serology and culture data using several classifiers*

1070 Let  $X$  be a classifier (e.g., the Phecode or a logistic regression classifier) of serology and  
1071 culture data based infection for a given pathogen, with probability density  $\varphi_+(x)$  for positive  
1072 instances and probability density  $\varphi_-(x)$  for negative instances. The ROC curve plots the  
1073 specificity (SP) and sensitivity (SN) at various thresholds:

1074 
$$SN(T) = \int_T^{\infty} \varphi_+(x) dx$$

1075 
$$SP(T) = 1 - \int_T^{\infty} \varphi_-(x) dx$$

1076 The area  $\Omega$  under the curve (AUC) is given by:

1077 
$$\Omega = \int_{-\infty}^{\infty} SN(T) SP'(T) dT = \int_{-\infty}^{\infty} \int_T^{\infty} \varphi_+(x) \varphi_-(T) dx dT = \int_{-\infty}^{\infty} \int_{-\infty}^{\infty} I(x > T) \varphi_+(x) \varphi_-(T) dx dT$$

1078 where  $I(A)$  is the indicator function, i.e., equal to one if  $(x, T) \in A$  and zero otherwise. The last  
1079 equals the probability that the classifier  $X$  ranks a randomly chosen positive instance (of culture  
1080 data based infection) higher than a randomly chosen negative instance. We estimated the  
1081 sampling distribution of  $\Omega$ , using bootstrapping ( $n = 100$ ) (Efron, 1979). We used the pROC  
1082 package for visualization.

1083  
1084 *Causal inference by Mendelian Randomization*

1085 To infer causality between the infectious diseases and potential complications, we  
1086 performed Mendelian Randomization (MR, (Davey Smith and Hemani, 2014; Lawlor et al.,

1087 2008)) in 23,294 individuals of European ancestry in BioVU. To define instrumental variables  
1088 (IVs), we clumped the exposure-associated SNPs with high linkage disequilibrium (LD) using  
1089 Plink1.9 ( $p < 1 \times 10^{-5}$ ,  $r^2 = 0.01$ ). Only biallelic non-palindromic variants were considered as IVs.  
1090 Considering the pervasive horizontal pleiotropy in human genetic variation (Jordan et al., 2019),  
1091 we applied summary statistics based MR-Egger regression (Bowden et al., 2015). MR-Egger  
1092 regression generalizes the inverse-variance weighted method, where the intercept is assumed  
1093 to be zero. We also used the weighted-median estimator (Bowden et al., 2016) to test the  
1094 causal effect of the exposure trait on the outcome. We leveraged the R package  
1095 'MendelianRandomization'.

1096

#### 1097 *High-throughput Human in vitro Susceptibility Testing (Hi-HOST)*

1098 We generated an atlas of TWAS associations with 79 pathogen-induced cellular traits –  
1099 including infectivity and replication, cytokine levels, and host cell death (Wang et al., 2018)  
1100 using the Hi-HOST platform (Ko et al., 2012; Ko et al., 2009). A list of populations, pathogens  
1101 and project description may be found at <http://h2p2.oit.duke.edu/About/>, and phenotype  
1102 definitions and family-based GWAS of the Hi-HOST Phenome Project were previously  
1103 described (Wang et al., 2018). Briefly, lymphoblastoid cell lines (LCLs) from the 1000 Genomes  
1104 Consortium (Auton et al., 2015) were obtained from the Coriell Institute. The LCLs represented  
1105 diverse populations, including ESN (Esan in Nigeria), GWD (Gambians in Western Divisions in  
1106 the Gambia), IBS (Iberian Population in Spain), and KHV (Kinh in Ho Chi Minh City, Vietnam).  
1107 LCLs were cultured in RPMI 1640 media containing 10% fetal bovine serum, 2 mM glutamine,  
1108 100 U/ml of penicillin-G, and 100 mg/ml streptomycin for 8 days prior to experimental use, as  
1109 previously described (Wang et al., 2018). *Chlamydia trachomatis* infection of LCLs was  
1110 performed using *C. trachomatis* LGV-L2 Rif<sup>R</sup> pGFP::SW2 (Saka et al., 2011). *Salmonella*  
1111 infection was performed using pMMB67GFP (Pujol and Bliska, 2003), and *sifA* deletion was  
1112 constructed using lambda red and validated using PCR (Datsenko and Wanner, 2000; Ko et al.,



1113 2009). *Candida albicans* SC5314 infection was performed as previously described (Odds et al.,  
1114 2004) and levels of fibroblast growth factor 2 were measured using enzyme linked  
1115 immunosorbent assays. *Staphylococcus aureus* toxin (alpha-hemolysin) was obtained from  
1116 Sigma and applied to LCLs at a concentration of 1  $\mu$ g/ml for 23 hours. Cell death was measured  
1117 using 7-AAD staining and flow cytometry. Additional experimental details can be found at  
1118 <http://h2p2.oit.duke.edu/About/>.

1119 We estimated the gene-level effect size on the Hi-HOST phenotypes, using GWAS  
1120 summary statistics (Barbeira et al., 2018) in each of the 44 GTEx tissues (version 6p) (Battle et  
1121 al., 2017). The gene expression prediction model was trained using GTEx as the reference  
1122 dataset (<https://zenodo.org/record/3572842/files/GTEx-V6p-HapMap-2016-09-08.tar.gz>). The  
1123 gene-level effect size was estimated using S-PrediXcan after allele harmonization (Barbeira et  
1124 al., 2018). We also applied MultiXcan to improve the ability to identify potential target genes  
1125 (Barbeira et al., 2019). In brief, MultiXcan regresses the cellular trait on the principal  
1126 components of the predicted expression data across all the available tissues. For each gene,  
1127 MultiXcan yields a joint effect estimate across the 44 tissues. We applied the summary-statistic  
1128 based version (S-MultiXcan) and followed the guides from the tool's webpage  
1129 <https://github.com/hakyimlab/MetaXcan>.

1130

1131

## 1132 **DATA AND SOFTWARE AVAILABILITY**

1133 All code is available at the project's github page:

1134 <https://github.com/gamazonlab/infectiousDiseaseResource>. All trait-level GWAS,

1135 PrediXcan, and Hi-HOST TWAS results are available at [www.phewascatalog.org](http://www.phewascatalog.org).

1136

1137

1138 **KEY RESOURCES TABLE**

| <b>REAGENT or RESOURCE</b>                      | <b>SOURCE</b>                                 | <b>IDENTIFIER</b>                                                                                                                                                                                 |
|-------------------------------------------------|-----------------------------------------------|---------------------------------------------------------------------------------------------------------------------------------------------------------------------------------------------------|
| PrediXcan genetic associations for 35 ID traits | This paper                                    | Available in Supplementary Materials.                                                                                                                                                             |
| BioVU                                           | (Denny et al., 2010; Roden et al., 2008)      | <a href="https://victr.vanderbilt.edu/pub/biovu/">https://victr.vanderbilt.edu/pub/biovu/</a>                                                                                                     |
| PrediXcan                                       | (Gamazon et al., 2018; Gamazon et al., 2015)  | <a href="https://github.com/hakyimlab/PrediXcan">https://github.com/hakyimlab/PrediXcan</a>                                                                                                       |
| GTEx                                            | (2015; Battle et al., 2017; Consortium, 2013) | <a href="https://gtexportal.org/home/">https://gtexportal.org/home/</a>                                                                                                                           |
| Gene Set Enrichment Analysis (GSEA)             | (Subramanian et al., 2005)                    | <a href="http://software.broadinstitute.org/gsea/index.jsp">http://software.broadinstitute.org/gsea/index.jsp</a>                                                                                 |
| Mendelian Randomization software package        | (Yavorska and Burgess, 2017)                  | <a href="https://cran.r-project.org/web/packages/MendelianRandomization/MendelianRandomization.pdf">https://cran.r-project.org/web/packages/MendelianRandomization/MendelianRandomization.pdf</a> |
| Hi-HOST GWAS                                    | (Ko et al., 2012; Wang et al., 2018)          | <a href="http://h2p2.oit.duke.edu/About/">http://h2p2.oit.duke.edu/About/</a>                                                                                                                     |
| Hi-HOST TWAS                                    | This paper.                                   | Available in Supplementary Materials.                                                                                                                                                             |

1139

1140
